# Supplementary material
Source: PubMed Central journal article supplement (PMC2787796)
Supplement: NIHMS159462-supplement-2_si_003.pdf [file NIHMS159462-supplement-2_si_003.pdf]

# Supporting Information for

## **H<sub>aq</sub><sup>+</sup> Structures in Proton Wires inside Nanotubes**

Evgenii S. Stoyanov, Irina V. Stoyanova, Fook S. Tham and Christopher A. Reed\*

(93 pages)

## X-Ray Structure Determination of $\text{H}(\text{CHB}_{11}\text{I}_{11})\cdot 8\text{H}_2\text{O}$

Most methods used for obtaining crystals of  $[\text{H}^+(\text{H}_2\text{O})_n][\text{CHB}_{11}\text{I}_{11}^-]$  gave  $[\text{H}_9\text{O}_4][\text{CHB}_{11}\text{I}_{11}]$ . Single crystals with the present channel structure were first obtained when dichloromethane solutions of  $[\text{H}^+(\text{H}_2\text{O})_n][\text{CHB}_{11}\text{I}_{11}^-]$  were equilibrated with water and slowly evaporated. However, the thin needles formed on the glass wall of the vial in this manner were not of sufficient quality for single crystal diffraction. Suitable crystals were obtained in the following manner. A concentrated water solution of the  $\text{CHB}_{11}\text{I}_{11}^-$  acid was evaporated under vacuum until a viscous oil of the consistency of honey was obtained. (Further removal of water produced crystals of  $[\text{H}_9\text{O}_4][\text{CHB}_{11}\text{I}_{11}]$ ). The ATR IR spectrum of this oil showed that bands from bulk water at 3400 and 1625  $\text{cm}^{-1}$  were practically absent suggesting that it represented something close to the formula of the octahydrate that was eventually obtained. A drop of this oil was aged for about three months in a closed vial as it slowly converted to solid. The final product contained clusters of needles which were gently separated and used for the diffraction study, along with a lesser amount of crystals of  $[\text{H}_9\text{O}_4][\text{CHB}_{11}\text{I}_{11}]$ .

A colorless needle fragment ( $0.29 \times 0.15 \times 0.10 \text{ mm}^3$ ) was used for the single crystal x-ray diffraction study of  $[[\text{H}_2\text{O}]_n\text{H}]^+[\text{CHB}_{11}\text{I}_{11}]^-$  (sample cr301r\_0m-6). The crystal was coated with perfluoropolyethers (PFPE) oil and mounted on to a cryo-loop glass fiber. X-ray intensity data were collected at 100(2) K on a Bruker APEX2 (version 2.0-22, **ref. 1**) platform-CCD x-ray diffractometer system (Mo-radiation,  $\lambda = 0.71073 \text{ \AA}$ , 50KV/40mA power). The CCD detector was placed at a distance of 5.0500 cm from the crystal.

A total of 3600 frames were collected for a sphere of reflections (with scan width of  $0.3^\circ$  in  $\omega$ , starting  $\omega$  and  $2\theta$  angles of  $-30^\circ$ , and  $\phi$  angles of  $0^\circ, 90^\circ, 120^\circ, 180^\circ, 240^\circ$ , and  $270^\circ$  for every 600 frames, 10 sec/frame exposure time). The frames were integrated using the Bruker SAINT software package (version V7.23A, **ref. 2**) and using a narrow-frame integration algorithm. Based on a triclinic crystal system, the integrated frames yielded a total of 104083 reflections at a maximum  $2\theta$  angle of  $56.56^\circ$  ( $0.75 \text{ \AA}$  resolution), of which 25033 were independent reflections ( $R_{\text{int}} = 0.0312$ ,  $R_{\text{sig}} = 0.0251$ , redundancy = 4.2, completeness = 99.8%) and 23101 (92.3%) reflections were greater than  $2\sigma(I)$ . The unit cell parameters were,  $\mathbf{a} = 9.9261(1) \text{ \AA}$ ,  $\mathbf{b} = 21.6927(3) \text{ \AA}$ ,  $\mathbf{c} = 23.8136(3) \text{ \AA}$ ,  $\alpha = 87.5427(5)^\circ$ ,  $\beta = 84.6721(5)^\circ$ ,  $\gamma = 81.8380(5)^\circ$ ,  $V = 5051.48(11) \text{ \AA}^3$ ,  $Z = 2$ , calculated density  $D_c = 3.289 \text{ g/cm}^3$ . Absorption corrections were applied (absorption coefficient  $\mu = 10.141 \text{ mm}^{-1}$ ; max/min transmission = 0.4304/0.1563) to the raw intensity data using the SADABS program (version 2004/1, **ref. 3**).

The Bruker SHELXTL software package (Version 6.14, **ref. 4**) was used for phase determination and structure refinement. The distribution of intensities ( $E^2 - 1 = 0.971$ ) and no systematic absent reflections indicated two possible space groups, P-1 and P1. The space group P-1 (#2) was later determined to be correct. Direct methods of phase determination followed by two Fourier cycles of refinement led to an electron density map from which most of the non-hydrogen atoms were identified in the asymmetry unit of the unit cell. With subsequent isotropic refinement, all of the non-hydrogen atoms were identified. There were three  $[[\text{H}_2\text{O}]_n\text{H}]^+$  cations and three anions of  $[\text{CHB}_{11}\text{I}_{11}]^-$  present in the asymmetry unit of the unit cell. The O-H distance and H-O-H angle for all water molecules were restrained to ice-structure,  $1.00 \text{ \AA}$  and  $107^\circ$  (averaged angle used), respectively using DFIX. The O22 and O23 water molecules were modeled as 50%/50% disorder

and O21 and O24 were modeled as partially occupied molecules, 78% and 38% occupied, respectively. The possible hydrogen bond angles and distances are given in Table 7. The CH distances for the carborane anions were restrained to 0.96 Å. The anti-bumping restraint, BUMP was used to allow short possible hydrogen bond between O---O or O---I atoms. The  $[\text{H}_7\text{O}_3]^+$  and  $[\text{H}_{17}\text{O}_8]^+$  clusters were generated through the inversion symmetry for the ordered water clusters.

**Alerts A and B** suggested by the PLATON cif-check program are possible false alarms:

**Alerts A:** The  $\text{H}^+$  ion [H10C is not an isolated H-atom] was assigned at the inversion center as required by the symmetrical H-bonding in the Zundel-type  $\text{H}_5\text{O}_2^+$  ion. There is no O-H bond between O23D and H23A because O23D is the 50% disordered water molecule of O23 where H23A is bonded. This is a possible false alarm because the two disordered molecules were refined using the PART 1 and PART 2 command to separate the two 50%/50% disordered water using SHELXTL refinement program. There is no O23D-H23A bonding.

**Alerts B:** The D-H...H-X short contacts of 1.97 and 1.98 Å for H10A...H10C, H10B...H10C, respectively, are considered possible false alarms because the three H-atoms belong to the Zundel-type  $\text{H}_5\text{O}_2^+$  ion, where H10C is the symmetrical H-bond between the oxygen. The D-H...H-X short contacts of 2.09 Å for H1WA...H6WC, H3WA...H5WA, and H5WB...H12B are considered possible false alarms because all these H-atoms belong either to the  $\text{H}_5\text{O}_2^+$ ,  $\text{H}_7\text{O}_3^+$ , or  $\text{H}_{17}\text{O}_8^+$  ions. The H20A...H22D short contact is probably due to the 50%/50% disordered water molecule of O22D/O22 (refined using the PART 1 and PART 2 command to separate disordered water). The O21-H21B group is part of a water molecule (not an OH-alcohol group) and the closest non-H atom is O20, which is 2.826 Å from H21B where the O-H...O angle is 97.08 degree. Similarly, O18-H18B...O16 distance is 2.556 and O-H...O angle is 79.51 degree and O19-H19B...I21 distance is 3.270 Å and is too far away to be considered D-H...A acceptor by the SHELXTL refinement program. The H16C...H18B short contact (2.09 Å) belongs to the water **channel-B** where some of the  $\text{H}_2\text{O}$  molecules are disordered. O16 water belongs to a  $\text{H}^+[\text{H}_2\text{O}]_n$  ionic group where H16C could be a covalent or ionic hydrogen instead of atomic-H as PLATON program suggested (H...H Van Der Waals contact is 2.18 Å). The characteristics of the  $\text{H}_2\text{O}$ -ionic groups in **channel-B** cannot be clearly identified as in **channel-A** because several of the water molecules are disordered or partially occupied.

Atomic coordinates, isotropic and anisotropic displacement parameters of all the non-hydrogen atoms were refined by means of a full matrix least-squares procedure on  $F^2$ . The refinement converged at  $R1 = 0.0260$ ,  $wR2 = 0.0588$ , with intensity,  $I > 2\sigma(I)$ . The largest peak/hole in the final difference map was 2.527/-1.492  $\text{e}/\text{Å}^3$ . The high difference electronic density peaks (next to iodine atoms) were probably due to absorption correction errors where the face indexed numerical absorption correction could not be applied because the crystal faces could not be clearly indexed when the sample was coated with PFPE oil.

## REFERENCES

1. *APEX 2*, version 2.0-22, Bruker (2004), Bruker AXS Inc., Madison, Wisconsin, USA.
2. *SAINT*, version V7.23A, Bruker (2003), Bruker AXS Inc., Madison, Wisconsin, USA.
3. *SADABS*, version 2004/1, Bruker (2004), Bruker AXS Inc., Madison, Wisconsin, USA.
4. *SHELXTL*, version 6.14, Bruker (2008), Bruker AXS Inc., Madison, Wisconsin, USA.

**Table 1.** Crystal data and structure refinement for [H(H<sub>2</sub>O)<sub>8</sub>][CHB<sub>11</sub>I<sub>11</sub>].

|                                   |                                                                                      |                  |
|-----------------------------------|--------------------------------------------------------------------------------------|------------------|
| Identification code               | cr301r_0m-6                                                                          |                  |
| Empirical formula                 | C <sub>3</sub> H <sub>51.81</sub> B <sub>33</sub> I <sub>33</sub> O <sub>23.15</sub> |                  |
| Formula weight                    | 5003.08                                                                              |                  |
| Temperature                       | 100(2) K                                                                             |                  |
| Wavelength                        | 0.71073 Å                                                                            |                  |
| Crystal system                    | Triclinic                                                                            |                  |
| Space group                       | P-1                                                                                  |                  |
| Unit cell dimensions              | a = 9.92610(10) Å                                                                    | α = 87.5427(5)°. |
|                                   | b = 21.6927(3) Å                                                                     | β = 84.6721(5)°. |
|                                   | c = 23.8136(3) Å                                                                     | γ = 81.8380(5)°. |
| Volume                            | 5051.48(11) Å <sup>3</sup>                                                           |                  |
| Z                                 | 2                                                                                    |                  |
| Density (calculated)              | 3.289 Mg/m <sup>3</sup>                                                              |                  |
| Absorption coefficient            | 10.141 mm <sup>-1</sup>                                                              |                  |
| F(000)                            | 4338                                                                                 |                  |
| Crystal size                      | 0.29 x 0.15 x 0.10 mm <sup>3</sup>                                                   |                  |
| Theta range for data collection   | 0.95 to 28.28°.                                                                      |                  |
| Index ranges                      | -13 ≤ h ≤ 13, -28 ≤ k ≤ 28, -31 ≤ l ≤ 31                                             |                  |
| Reflections collected             | 104083                                                                               |                  |
| Independent reflections           | 25033 [R(int) = 0.0312]                                                              |                  |
| Completeness to theta = 28.28°    | 99.8 %                                                                               |                  |
| Absorption correction             | Semi-empirical from equivalents                                                      |                  |
| Max. and min. transmission        | 0.4304 and 0.1563                                                                    |                  |
| Refinement method                 | Full-matrix least-squares on F <sup>2</sup>                                          |                  |
| Data / restraints / parameters    | 25033 / 294 / 1029                                                                   |                  |
| Goodness-of-fit on F <sup>2</sup> | 1.137                                                                                |                  |
| Final R indices [I > 2σ(I)]       | R1 = 0.0260, wR2 = 0.0588                                                            |                  |
| R indices (all data)              | R1 = 0.0295, wR2 = 0.0601                                                            |                  |
| Largest diff. peak and hole       | 2.527 and -1.492 e.Å <sup>-3</sup>                                                   |                  |

**Table 2.** Atomic coordinates ( x 10<sup>4</sup>) and equivalent isotropic displacement parameters (Å<sup>2</sup>x 10<sup>3</sup>) for cr301r\_0m-6. U(eq) is defined as one third of the trace of the orthogonalized U<sup>ij</sup> tensor.

|       | x        | y        | z       | U(eq) |
|-------|----------|----------|---------|-------|
| C(1)  | 6104(4)  | 8948(2)  | 4706(2) | 13(1) |
| B(2)  | 5262(4)  | 8395(2)  | 4441(2) | 12(1) |
| B(3)  | 5529(4)  | 9098(2)  | 4046(2) | 13(1) |
| B(4)  | 7131(5)  | 9315(2)  | 4208(2) | 15(1) |
| B(5)  | 7853(4)  | 8742(2)  | 4706(2) | 14(1) |
| B(6)  | 6684(5)  | 8187(2)  | 4849(2) | 16(1) |
| B(7)  | 6588(5)  | 7799(2)  | 4212(2) | 14(1) |
| B(8)  | 5873(5)  | 8365(2)  | 3714(2) | 15(1) |
| B(9)  | 7025(5)  | 8929(2)  | 3570(2) | 14(1) |
| B(10) | 8451(5)  | 8707(2)  | 3973(2) | 14(1) |
| B(11) | 8177(5)  | 8008(2)  | 4378(2) | 15(1) |
| B(12) | 7689(5)  | 8123(2)  | 3670(2) | 15(1) |
| I(1)  | 3251(1)  | 8227(1)  | 4767(1) | 16(1) |
| I(2)  | 3824(1)  | 9794(1)  | 3913(1) | 16(1) |
| I(3)  | 7323(1)  | 10277(1) | 4276(1) | 18(1) |
| I(4)  | 9028(1)  | 8998(1)  | 5350(1) | 19(1) |
| I(5)  | 6362(1)  | 7803(1)  | 5691(1) | 20(1) |
| I(6)  | 6198(1)  | 6844(1)  | 4227(1) | 22(1) |
| I(7)  | 4610(1)  | 8133(1)  | 3088(1) | 17(1) |
| I(8)  | 7168(1)  | 9429(1)  | 2768(1) | 19(1) |
| I(9)  | 10474(1) | 8908(1)  | 3694(1) | 21(1) |
| I(10) | 9802(1)  | 7318(1)  | 4639(1) | 23(1) |
| I(11) | 8749(1)  | 7564(1)  | 2992(1) | 22(1) |
| C(2)  | 1214(4)  | 2092(2)  | 3076(2) | 16(1) |
| B(13) | 605(5)   | 1529(2)  | 2716(2) | 16(1) |
| B(14) | -511(5)  | 2199(2)  | 2982(2) | 18(1) |
| B(15) | 456(5)   | 2844(2)  | 2942(2) | 19(1) |
| B(16) | 2153(5)  | 2576(2)  | 2653(2) | 19(1) |
| B(17) | 2249(5)  | 1764(2)  | 2518(2) | 17(1) |
| B(18) | 1125(5)  | 1686(2)  | 1992(2) | 18(1) |
| B(19) | -605(5)  | 1960(2)  | 2278(2) | 18(1) |

|       |          |         |         |       |
|-------|----------|---------|---------|-------|
| B(20) | -692(5)  | 2771(2) | 2421(2) | 20(1) |
| B(21) | 959(5)   | 3000(2) | 2213(2) | 20(1) |
| B(22) | 2076(5)  | 2331(2) | 1954(2) | 18(1) |
| B(23) | 317(5)   | 2452(2) | 1804(2) | 19(1) |
| I(12) | 408(1)   | 624(1)  | 3083(1) | 18(1) |
| I(13) | -2026(1) | 2083(1) | 3667(1) | 22(1) |
| I(14) | 79(1)    | 3518(1) | 3597(1) | 25(1) |
| I(15) | 3909(1)  | 2944(1) | 2895(1) | 23(1) |
| I(16) | 4071(1)  | 1135(1) | 2662(1) | 21(1) |
| I(17) | 1559(1)  | 934(1)  | 1412(1) | 27(1) |
| I(18) | -2357(1) | 1573(1) | 2074(1) | 29(1) |
| I(19) | -2518(1) | 3416(1) | 2365(1) | 29(1) |
| I(20) | 1184(1)  | 3934(1) | 1916(1) | 28(1) |
| I(21) | 3748(1)  | 2408(1) | 1321(1) | 26(1) |
| I(22) | -305(1)  | 2690(1) | 969(1)  | 27(1) |
| C(3)  | 5162(4)  | 5714(2) | 766(2)  | 12(1) |
| B(24) | 5736(5)  | 6422(2) | 632(2)  | 14(1) |
| B(25) | 6032(4)  | 5988(2) | 1275(2) | 13(1) |
| B(26) | 4585(5)  | 5578(2) | 1463(2) | 14(1) |
| B(27) | 3420(5)  | 5759(2) | 927(2)  | 15(1) |
| B(28) | 4135(5)  | 6279(2) | 413(2)  | 15(1) |
| B(29) | 4254(5)  | 6985(2) | 758(2)  | 14(1) |
| B(30) | 5424(5)  | 6808(2) | 1288(2) | 15(1) |
| B(31) | 4729(5)  | 6279(2) | 1803(2) | 16(1) |
| B(32) | 3107(5)  | 6135(2) | 1592(2) | 14(1) |
| B(33) | 2823(4)  | 6572(2) | 942(2)  | 13(1) |
| B(34) | 3613(5)  | 6896(2) | 1484(2) | 14(1) |
| I(23) | 7427(1)  | 6551(1) | 27(1)   | 16(1) |
| I(24) | 8066(1)  | 5562(1) | 1415(1) | 20(1) |
| I(25) | 4838(1)  | 4672(1) | 1864(1) | 18(1) |
| I(26) | 2304(1)  | 5067(1) | 658(1)  | 18(1) |
| I(27) | 3872(1)  | 6216(1) | -463(1) | 18(1) |
| I(28) | 4040(1)  | 7863(1) | 294(1)  | 21(1) |
| I(29) | 6720(1)  | 7459(1) | 1515(1) | 20(1) |
| I(30) | 5193(1)  | 6261(1) | 2671(1) | 18(1) |
| I(31) | 1443(1)  | 5948(1) | 2189(1) | 18(1) |

|        |          |          |          |        |
|--------|----------|----------|----------|--------|
| I(32)  | 778(1)   | 6899(1)  | 724(1)   | 19(1)  |
| I(33)  | 2543(1)  | 7682(1)  | 1942(1)  | 20(1)  |
| O(1)   | 3058(6)  | 4735(2)  | 3365(2)  | 67(2)  |
| O(2)   | 2452(5)  | 6870(2)  | 3645(2)  | 67(2)  |
| O(3)   | 3024(5)  | 6269(2)  | 4779(2)  | 63(2)  |
| O(4)   | 5799(5)  | 4701(2)  | 3599(2)  | 59(1)  |
| O(5)   | 937(5)   | 5646(2)  | 5207(2)  | 56(1)  |
| O(6)   | 1584(5)  | 5747(2)  | 3760(2)  | 59(1)  |
| O(7)   | 3133(5)  | 3944(2)  | 4308(2)  | 55(1)  |
| O(8)   | 8127(5)  | 4967(2)  | 2874(2)  | 46(1)  |
| O(9)   | 5993(4)  | 3562(2)  | 4192(2)  | 47(1)  |
| O(10)  | 5104(7)  | 5346(3)  | 4551(3)  | 80(2)  |
| O(11)  | -975(6)  | 5816(3)  | 3540(3)  | 76(2)  |
| O(12)  | 1453(6)  | 4420(3)  | 5200(3)  | 80(2)  |
| O(13)  | 3229(4)  | 9537(2)  | 2339(2)  | 41(1)  |
| O(14)  | 721(4)   | 9164(2)  | 2113(2)  | 46(1)  |
| O(15)  | 2255(5)  | 11728(2) | -74(2)   | 51(1)  |
| O(16)  | 4087(6)  | 10706(3) | 148(3)   | 100(2) |
| O(17)  | 4609(8)  | 9098(3)  | 1356(3)  | 118(3) |
| O(18)  | 3252(8)  | 9676(3)  | 503(3)   | 103(2) |
| O(19)  | 5684(10) | 10910(4) | 895(4)   | 137(4) |
| O(20)  | -244(7)  | 11470(3) | -372(4)  | 117(3) |
| O(21)  | 1737(10) | 8916(4)  | -620(4)  | 109(4) |
| O(22)  | 669(18)  | 9393(6)  | 1001(7)  | 126(6) |
| O(22D) | 483(12)  | 10593(5) | -1241(4) | 60(3)  |
| O(23)  | 7054(11) | 9781(5)  | 1326(6)  | 83(4)  |
| O(23D) | 7077(15) | 9267(6)  | 1112(6)  | 114(5) |
| O(24)  | -792(16) | 8433(6)  | 1519(7)  | 107(8) |

---



**Table 3.** Bond lengths [Å] and angles [°] for cr301r\_0m-6.

---

|            |          |
|------------|----------|
| C(1)-B(6)  | 1.702(6) |
| C(1)-B(3)  | 1.723(6) |
| C(1)-B(2)  | 1.728(6) |
| C(1)-B(5)  | 1.730(6) |
| C(1)-B(4)  | 1.732(6) |
| C(1)-H(1)  | 0.959(9) |
| B(2)-B(7)  | 1.774(6) |
| B(2)-B(8)  | 1.782(6) |
| B(2)-B(6)  | 1.783(6) |
| B(2)-B(3)  | 1.796(6) |
| B(2)-I(1)  | 2.148(4) |
| B(3)-B(8)  | 1.781(7) |
| B(3)-B(9)  | 1.786(6) |
| B(3)-B(4)  | 1.800(7) |
| B(3)-I(2)  | 2.140(4) |
| B(4)-B(9)  | 1.783(7) |
| B(4)-B(10) | 1.789(7) |
| B(4)-B(5)  | 1.800(6) |
| B(4)-I(3)  | 2.138(5) |
| B(5)-B(11) | 1.779(7) |
| B(5)-B(6)  | 1.790(7) |
| B(5)-B(10) | 1.791(6) |
| B(5)-I(4)  | 2.146(5) |
| B(6)-B(11) | 1.781(7) |
| B(6)-B(7)  | 1.782(7) |
| B(6)-I(5)  | 2.151(5) |
| B(7)-B(11) | 1.785(7) |
| B(7)-B(8)  | 1.791(6) |
| B(7)-B(12) | 1.799(6) |
| B(7)-I(6)  | 2.158(5) |
| B(8)-B(9)  | 1.790(7) |
| B(8)-B(12) | 1.799(7) |
| B(8)-I(7)  | 2.153(5) |
| B(9)-B(10) | 1.781(6) |

|             |          |
|-------------|----------|
| B(9)-B(12)  | 1.793(6) |
| B(9)-I(8)   | 2.159(4) |
| B(10)-B(12) | 1.777(7) |
| B(10)-B(11) | 1.802(6) |
| B(10)-I(9)  | 2.154(4) |
| B(11)-B(12) | 1.796(7) |
| B(11)-I(10) | 2.157(4) |
| B(12)-I(11) | 2.161(5) |
| C(2)-B(17)  | 1.717(6) |
| C(2)-B(15)  | 1.726(6) |
| C(2)-B(13)  | 1.727(7) |
| C(2)-B(14)  | 1.729(6) |
| C(2)-B(16)  | 1.731(6) |
| C(2)-H(2)   | 0.956(9) |
| B(13)-B(18) | 1.786(7) |
| B(13)-B(17) | 1.794(7) |
| B(13)-B(14) | 1.797(7) |
| B(13)-B(19) | 1.799(7) |
| B(13)-I(12) | 2.141(5) |
| B(14)-B(20) | 1.787(7) |
| B(14)-B(19) | 1.791(7) |
| B(14)-B(15) | 1.799(7) |
| B(14)-I(13) | 2.146(5) |
| B(15)-B(16) | 1.785(7) |
| B(15)-B(20) | 1.787(7) |
| B(15)-B(21) | 1.793(7) |
| B(15)-I(14) | 2.156(5) |
| B(16)-B(22) | 1.781(7) |
| B(16)-B(21) | 1.787(7) |
| B(16)-B(17) | 1.791(7) |
| B(16)-I(15) | 2.151(5) |
| B(17)-B(18) | 1.780(7) |
| B(17)-B(22) | 1.784(6) |
| B(17)-I(16) | 2.150(5) |
| B(18)-B(22) | 1.790(7) |
| B(18)-B(23) | 1.798(7) |

|             |          |
|-------------|----------|
| B(18)-B(19) | 1.814(7) |
| B(18)-I(17) | 2.154(5) |
| B(19)-B(20) | 1.795(7) |
| B(19)-B(23) | 1.798(7) |
| B(19)-I(18) | 2.138(5) |
| B(20)-B(21) | 1.800(7) |
| B(20)-B(23) | 1.804(7) |
| B(20)-I(19) | 2.138(5) |
| B(21)-B(23) | 1.788(8) |
| B(21)-B(22) | 1.792(7) |
| B(21)-I(20) | 2.152(5) |
| B(22)-B(23) | 1.795(7) |
| B(22)-I(21) | 2.156(5) |
| B(23)-I(22) | 2.157(5) |
| C(3)-B(24)  | 1.718(6) |
| C(3)-B(25)  | 1.721(6) |
| C(3)-B(28)  | 1.722(6) |
| C(3)-B(27)  | 1.725(6) |
| C(3)-B(26)  | 1.730(6) |
| C(3)-H(3)   | 0.960(9) |
| B(24)-B(30) | 1.784(7) |
| B(24)-B(29) | 1.785(6) |
| B(24)-B(25) | 1.787(6) |
| B(24)-B(28) | 1.789(7) |
| B(24)-I(23) | 2.150(5) |
| B(25)-B(31) | 1.786(6) |
| B(25)-B(30) | 1.796(6) |
| B(25)-B(26) | 1.806(6) |
| B(25)-I(24) | 2.147(4) |
| B(26)-B(32) | 1.775(6) |
| B(26)-B(31) | 1.784(7) |
| B(26)-B(27) | 1.794(6) |
| B(26)-I(25) | 2.140(4) |
| B(27)-B(33) | 1.779(6) |
| B(27)-B(32) | 1.793(7) |
| B(27)-B(28) | 1.795(6) |

|             |           |
|-------------|-----------|
| B(27)-I(26) | 2.140(5)  |
| B(28)-B(29) | 1.791(7)  |
| B(28)-B(33) | 1.793(6)  |
| B(28)-I(27) | 2.139(5)  |
| B(29)-B(30) | 1.786(7)  |
| B(29)-B(33) | 1.796(6)  |
| B(29)-B(34) | 1.797(7)  |
| B(29)-I(28) | 2.155(4)  |
| B(30)-B(34) | 1.799(6)  |
| B(30)-B(31) | 1.801(7)  |
| B(30)-I(29) | 2.157(5)  |
| B(31)-B(34) | 1.800(6)  |
| B(31)-B(32) | 1.803(7)  |
| B(31)-I(30) | 2.156(5)  |
| B(32)-B(34) | 1.793(7)  |
| B(32)-B(33) | 1.803(6)  |
| B(32)-I(31) | 2.149(4)  |
| B(33)-B(34) | 1.788(7)  |
| B(33)-I(32) | 2.156(4)  |
| B(34)-I(33) | 2.159(5)  |
| O(1)-H(1WA) | 1.001(9)  |
| O(1)-H(1WB) | 0.997(10) |
| O(2)-H(2WA) | 1.000(10) |
| O(2)-H(2WB) | 0.999(10) |
| O(3)-H(3WA) | 1.001(9)  |
| O(3)-H(3WB) | 0.999(9)  |
| O(4)-H(4WA) | 1.001(10) |
| O(4)-H(4WB) | 1.001(10) |
| O(5)-H(5WA) | 1.000(9)  |
| O(5)-H(5WB) | 0.997(9)  |
| O(6)-H(6WA) | 1.004(9)  |
| O(6)-H(6WB) | 1.002(10) |
| O(6)-H(6WC) | 1.000(10) |
| O(7)-H(7WA) | 1.002(10) |
| O(7)-H(7WB) | 1.000(10) |
| O(8)-H(8WA) | 0.999(10) |

|               |           |
|---------------|-----------|
| O(8)-H(8WB)   | 0.998(10) |
| O(9)-H(9WA)   | 1.000(10) |
| O(9)-H(9WB)   | 0.999(10) |
| O(10)-H(10C)  | 1.283(6)  |
| O(10)-H(10A)  | 1.003(9)  |
| O(10)-H(10B)  | 0.999(9)  |
| O(10)-H(10C)  | 1.283(6)  |
| O(11)-H(11A)  | 1.002(10) |
| O(11)-H(11B)  | 1.003(10) |
| O(12)-H(12A)  | 1.006(10) |
| O(12)-H(12B)  | 1.007(10) |
| O(13)-H(13A)  | 0.998(10) |
| O(13)-H(13B)  | 0.998(10) |
| O(14)-H(14A)  | 0.996(10) |
| O(14)-H(14B)  | 0.995(10) |
| O(15)-H(15A)  | 0.997(10) |
| O(15)-H(15B)  | 0.996(10) |
| O(16)-H(16A)  | 1.002(10) |
| O(16)-H(16B)  | 1.000(10) |
| O(16)-H(16C)  | 1.001(10) |
| O(17)-H(17A)  | 0.999(9)  |
| O(17)-H(17B)  | 0.999(10) |
| O(18)-H(18A)  | 1.000(10) |
| O(18)-H(18B)  | 1.004(10) |
| O(19)-H(19A)  | 1.005(10) |
| O(19)-H(19B)  | 1.003(10) |
| O(20)-H(20A)  | 1.002(9)  |
| O(20)-H(20B)  | 1.000(10) |
| O(21)-H(21A)  | 1.002(10) |
| O(21)-H(21B)  | 1.012(10) |
| O(22)-H(22A)  | 1.004(10) |
| O(22)-H(22B)  | 1.001(10) |
| O(22D)-H(22C) | 1.011(10) |
| O(22D)-H(22D) | 1.004(10) |
| O(23)-H(23A)  | 1.000(10) |
| O(23)-H(23B)  | 1.005(10) |

|                |           |
|----------------|-----------|
| O(23D)-H(23A)  | 1.31(5)   |
| O(23D)-H(23C)  | 1.000(10) |
| O(23D)-H(23D)  | 1.002(10) |
| O(24)-H(24A)   | 1.000(10) |
| O(24)-H(24B)   | 1.000(10) |
|                |           |
| B(6)-C(1)-B(3) | 114.7(3)  |
| B(6)-C(1)-B(2) | 62.6(3)   |
| B(3)-C(1)-B(2) | 62.7(3)   |
| B(6)-C(1)-B(5) | 62.9(3)   |
| B(3)-C(1)-B(5) | 114.7(3)  |
| B(2)-C(1)-B(5) | 114.7(3)  |
| B(6)-C(1)-B(4) | 114.9(3)  |
| B(3)-C(1)-B(4) | 62.8(3)   |
| B(2)-C(1)-B(4) | 114.8(3)  |
| B(5)-C(1)-B(4) | 62.7(2)   |
| B(6)-C(1)-H(1) | 118.7(8)  |
| B(3)-C(1)-H(1) | 117.0(8)  |
| B(2)-C(1)-H(1) | 118.2(8)  |
| B(5)-C(1)-H(1) | 117.9(8)  |
| B(4)-C(1)-H(1) | 116.7(8)  |
| C(1)-B(2)-B(7) | 104.2(3)  |
| C(1)-B(2)-B(8) | 104.2(3)  |
| B(7)-B(2)-B(8) | 60.5(3)   |
| C(1)-B(2)-B(6) | 58.0(2)   |
| B(7)-B(2)-B(6) | 60.1(3)   |
| B(8)-B(2)-B(6) | 108.2(3)  |
| C(1)-B(2)-B(3) | 58.5(2)   |
| B(7)-B(2)-B(3) | 108.0(3)  |
| B(8)-B(2)-B(3) | 59.7(2)   |
| B(6)-B(2)-B(3) | 107.4(3)  |
| C(1)-B(2)-I(1) | 123.1(3)  |
| B(7)-B(2)-I(1) | 123.8(3)  |
| B(8)-B(2)-I(1) | 124.3(3)  |
| B(6)-B(2)-I(1) | 120.6(3)  |
| B(3)-B(2)-I(1) | 121.3(3)  |

|                  |          |
|------------------|----------|
| C(1)-B(3)-B(8)   | 104.5(3) |
| C(1)-B(3)-B(9)   | 104.4(3) |
| B(8)-B(3)-B(9)   | 60.3(3)  |
| C(1)-B(3)-B(2)   | 58.8(2)  |
| B(8)-B(3)-B(2)   | 59.8(2)  |
| B(9)-B(3)-B(2)   | 108.0(3) |
| C(1)-B(3)-B(4)   | 58.8(2)  |
| B(8)-B(3)-B(4)   | 108.1(3) |
| B(9)-B(3)-B(4)   | 59.6(3)  |
| B(2)-B(3)-B(4)   | 108.3(3) |
| C(1)-B(3)-I(2)   | 121.2(3) |
| B(8)-B(3)-I(2)   | 125.0(3) |
| B(9)-B(3)-I(2)   | 125.8(3) |
| B(2)-B(3)-I(2)   | 119.7(3) |
| B(4)-B(3)-I(2)   | 120.6(3) |
| C(1)-B(4)-B(9)   | 104.1(3) |
| C(1)-B(4)-B(10)  | 104.2(3) |
| B(9)-B(4)-B(10)  | 59.8(3)  |
| C(1)-B(4)-B(3)   | 58.4(2)  |
| B(9)-B(4)-B(3)   | 59.8(3)  |
| B(10)-B(4)-B(3)  | 107.5(3) |
| C(1)-B(4)-B(5)   | 58.6(2)  |
| B(9)-B(4)-B(5)   | 107.7(3) |
| B(10)-B(4)-B(5)  | 59.9(3)  |
| B(3)-B(4)-B(5)   | 107.7(3) |
| C(1)-B(4)-I(3)   | 120.5(3) |
| B(9)-B(4)-I(3)   | 125.9(3) |
| B(10)-B(4)-I(3)  | 126.7(3) |
| B(3)-B(4)-I(3)   | 119.6(3) |
| B(5)-B(4)-I(3)   | 120.6(3) |
| C(1)-B(5)-B(11)  | 104.0(3) |
| C(1)-B(5)-B(6)   | 57.8(2)  |
| B(11)-B(5)-B(6)  | 59.9(3)  |
| C(1)-B(5)-B(10)  | 104.2(3) |
| B(11)-B(5)-B(10) | 60.6(3)  |
| B(6)-B(5)-B(10)  | 107.9(3) |

|                  |          |
|------------------|----------|
| C(1)-B(5)-B(4)   | 58.7(2)  |
| B(11)-B(5)-B(4)  | 108.3(3) |
| B(6)-B(5)-B(4)   | 107.4(3) |
| B(10)-B(5)-B(4)  | 59.7(2)  |
| C(1)-B(5)-I(4)   | 123.7(3) |
| B(11)-B(5)-I(4)  | 123.5(3) |
| B(6)-B(5)-I(4)   | 121.2(3) |
| B(10)-B(5)-I(4)  | 123.9(3) |
| B(4)-B(5)-I(4)   | 121.0(3) |
| C(1)-B(6)-B(11)  | 105.1(3) |
| C(1)-B(6)-B(7)   | 105.0(3) |
| B(11)-B(6)-B(7)  | 60.1(3)  |
| C(1)-B(6)-B(2)   | 59.4(2)  |
| B(11)-B(6)-B(2)  | 108.3(3) |
| B(7)-B(6)-B(2)   | 59.7(3)  |
| C(1)-B(6)-B(5)   | 59.3(2)  |
| B(11)-B(6)-B(5)  | 59.7(3)  |
| B(7)-B(6)-B(5)   | 108.1(3) |
| B(2)-B(6)-B(5)   | 109.2(3) |
| C(1)-B(6)-I(5)   | 119.9(3) |
| B(11)-B(6)-I(5)  | 125.8(3) |
| B(7)-B(6)-I(5)   | 126.0(3) |
| B(2)-B(6)-I(5)   | 119.5(3) |
| B(5)-B(6)-I(5)   | 119.7(3) |
| B(2)-B(7)-B(6)   | 60.2(3)  |
| B(2)-B(7)-B(11)  | 108.5(3) |
| B(6)-B(7)-B(11)  | 59.9(3)  |
| B(2)-B(7)-B(8)   | 60.0(2)  |
| B(6)-B(7)-B(8)   | 107.8(3) |
| B(11)-B(7)-B(8)  | 108.3(3) |
| B(2)-B(7)-B(12)  | 108.4(3) |
| B(6)-B(7)-B(12)  | 107.9(3) |
| B(11)-B(7)-B(12) | 60.2(3)  |
| B(8)-B(7)-B(12)  | 60.1(2)  |
| B(2)-B(7)-I(6)   | 119.8(3) |
| B(6)-B(7)-I(6)   | 121.1(3) |



|                  |          |
|------------------|----------|
| B(11)-B(7)-I(6)  | 122.5(3) |
| B(8)-B(7)-I(6)   | 121.5(3) |
| B(12)-B(7)-I(6)  | 123.0(3) |
| B(3)-B(8)-B(2)   | 60.5(3)  |
| B(3)-B(8)-B(9)   | 60.0(3)  |
| B(2)-B(8)-B(9)   | 108.4(3) |
| B(3)-B(8)-B(7)   | 107.9(3) |
| B(2)-B(8)-B(7)   | 59.5(2)  |
| B(9)-B(8)-B(7)   | 108.0(3) |
| B(3)-B(8)-B(12)  | 108.0(3) |
| B(2)-B(8)-B(12)  | 108.0(3) |
| B(9)-B(8)-B(12)  | 59.9(3)  |
| B(7)-B(8)-B(12)  | 60.1(3)  |
| B(3)-B(8)-I(7)   | 121.0(3) |
| B(2)-B(8)-I(7)   | 121.0(3) |
| B(9)-B(8)-I(7)   | 121.8(3) |
| B(7)-B(8)-I(7)   | 122.2(3) |
| B(12)-B(8)-I(7)  | 122.4(3) |
| B(10)-B(9)-B(4)  | 60.2(3)  |
| B(10)-B(9)-B(3)  | 108.5(3) |
| B(4)-B(9)-B(3)   | 60.6(3)  |
| B(10)-B(9)-B(8)  | 108.0(3) |
| B(4)-B(9)-B(8)   | 108.3(3) |
| B(3)-B(9)-B(8)   | 59.7(3)  |
| B(10)-B(9)-B(12) | 59.6(3)  |
| B(4)-B(9)-B(12)  | 108.1(3) |
| B(3)-B(9)-B(12)  | 108.1(3) |
| B(8)-B(9)-B(12)  | 60.3(3)  |
| B(10)-B(9)-I(8)  | 123.1(3) |
| B(4)-B(9)-I(8)   | 120.3(3) |
| B(3)-B(9)-I(8)   | 119.5(3) |
| B(8)-B(9)-I(8)   | 121.5(3) |
| B(12)-B(9)-I(8)  | 123.7(3) |
| B(12)-B(10)-B(9) | 60.5(3)  |
| B(12)-B(10)-B(4) | 108.6(3) |
| B(9)-B(10)-B(4)  | 59.9(3)  |

|                   |          |
|-------------------|----------|
| B(12)-B(10)-B(5)  | 108.1(3) |
| B(9)-B(10)-B(5)   | 108.2(3) |
| B(4)-B(10)-B(5)   | 60.4(3)  |
| B(12)-B(10)-B(11) | 60.2(3)  |
| B(9)-B(10)-B(11)  | 108.2(3) |
| B(4)-B(10)-B(11)  | 107.8(3) |
| B(5)-B(10)-B(11)  | 59.3(3)  |
| B(12)-B(10)-I(9)  | 122.6(3) |
| B(9)-B(10)-I(9)   | 122.6(3) |
| B(4)-B(10)-I(9)   | 120.9(3) |
| B(5)-B(10)-I(9)   | 120.2(3) |
| B(11)-B(10)-I(9)  | 121.7(3) |
| B(5)-B(11)-B(6)   | 60.4(3)  |
| B(5)-B(11)-B(7)   | 108.5(3) |
| B(6)-B(11)-B(7)   | 60.0(3)  |
| B(5)-B(11)-B(12)  | 107.9(3) |
| B(6)-B(11)-B(12)  | 108.1(3) |
| B(7)-B(11)-B(12)  | 60.3(3)  |
| B(5)-B(11)-B(10)  | 60.0(3)  |
| B(6)-B(11)-B(10)  | 107.8(3) |
| B(7)-B(11)-B(10)  | 107.5(3) |
| B(12)-B(11)-B(10) | 59.2(3)  |
| B(5)-B(11)-I(10)  | 119.6(3) |
| B(6)-B(11)-I(10)  | 118.8(3) |
| B(7)-B(11)-I(10)  | 121.6(3) |
| B(12)-B(11)-I(10) | 124.7(3) |
| B(10)-B(11)-I(10) | 123.9(3) |
| B(10)-B(12)-B(9)  | 59.9(3)  |
| B(10)-B(12)-B(11) | 60.6(3)  |
| B(9)-B(12)-B(11)  | 108.0(3) |
| B(10)-B(12)-B(7)  | 108.0(3) |
| B(9)-B(12)-B(7)   | 107.5(3) |
| B(11)-B(12)-B(7)  | 59.5(3)  |
| B(10)-B(12)-B(8)  | 107.8(3) |
| B(9)-B(12)-B(8)   | 59.8(3)  |
| B(11)-B(12)-B(8)  | 107.4(3) |

|                   |          |
|-------------------|----------|
| B(7)-B(12)-B(8)   | 59.7(3)  |
| B(10)-B(12)-I(11) | 121.7(3) |
| B(9)-B(12)-I(11)  | 122.7(3) |
| B(11)-B(12)-I(11) | 121.2(3) |
| B(7)-B(12)-I(11)  | 121.5(3) |
| B(8)-B(12)-I(11)  | 122.3(3) |
| B(17)-C(2)-B(15)  | 114.2(3) |
| B(17)-C(2)-B(13)  | 62.8(3)  |
| B(15)-C(2)-B(13)  | 114.6(3) |
| B(17)-C(2)-B(14)  | 114.6(3) |
| B(15)-C(2)-B(14)  | 62.8(3)  |
| B(13)-C(2)-B(14)  | 62.7(3)  |
| B(17)-C(2)-B(16)  | 62.6(3)  |
| B(15)-C(2)-B(16)  | 62.2(3)  |
| B(13)-C(2)-B(16)  | 114.5(3) |
| B(14)-C(2)-B(16)  | 114.3(3) |
| B(17)-C(2)-H(2)   | 118.1(8) |
| B(15)-C(2)-H(2)   | 117.7(9) |
| B(13)-C(2)-H(2)   | 117.9(8) |
| B(14)-C(2)-H(2)   | 117.6(8) |
| B(16)-C(2)-H(2)   | 118.1(9) |
| C(2)-B(13)-B(18)  | 104.3(3) |
| C(2)-B(13)-B(17)  | 58.3(3)  |
| B(18)-B(13)-B(17) | 59.6(3)  |
| C(2)-B(13)-B(14)  | 58.7(3)  |
| B(18)-B(13)-B(14) | 108.2(3) |
| B(17)-B(13)-B(14) | 107.7(3) |
| C(2)-B(13)-B(19)  | 104.6(3) |
| B(18)-B(13)-B(19) | 60.8(3)  |
| B(17)-B(13)-B(19) | 108.2(3) |
| B(14)-B(13)-B(19) | 59.7(3)  |
| C(2)-B(13)-I(12)  | 122.1(3) |
| B(18)-B(13)-I(12) | 125.0(3) |
| B(17)-B(13)-I(12) | 121.4(3) |
| B(14)-B(13)-I(12) | 119.9(3) |
| B(19)-B(13)-I(12) | 124.1(3) |

|                   |          |
|-------------------|----------|
| C(2)-B(14)-B(20)  | 104.6(3) |
| C(2)-B(14)-B(19)  | 104.9(3) |
| B(20)-B(14)-B(19) | 60.2(3)  |
| C(2)-B(14)-B(13)  | 58.6(3)  |
| B(20)-B(14)-B(13) | 108.2(3) |
| B(19)-B(14)-B(13) | 60.2(3)  |
| C(2)-B(14)-B(15)  | 58.5(2)  |
| B(20)-B(14)-B(15) | 59.8(3)  |
| B(19)-B(14)-B(15) | 107.9(3) |
| B(13)-B(14)-B(15) | 107.7(3) |
| C(2)-B(14)-I(13)  | 121.7(3) |
| B(20)-B(14)-I(13) | 125.4(3) |
| B(19)-B(14)-I(13) | 124.0(3) |
| B(13)-B(14)-I(13) | 119.5(3) |
| B(15)-B(14)-I(13) | 121.7(3) |
| C(2)-B(15)-B(16)  | 59.0(3)  |
| C(2)-B(15)-B(20)  | 104.7(3) |
| B(16)-B(15)-B(20) | 108.4(4) |
| C(2)-B(15)-B(21)  | 104.9(3) |
| B(16)-B(15)-B(21) | 59.9(3)  |
| B(20)-B(15)-B(21) | 60.4(3)  |
| C(2)-B(15)-B(14)  | 58.7(3)  |
| B(16)-B(15)-B(14) | 108.3(3) |
| B(20)-B(15)-B(14) | 59.8(3)  |
| B(21)-B(15)-B(14) | 108.1(4) |
| C(2)-B(15)-I(14)  | 121.0(3) |
| B(16)-B(15)-I(14) | 121.1(3) |
| B(20)-B(15)-I(14) | 124.4(3) |
| B(21)-B(15)-I(14) | 125.9(3) |
| B(14)-B(15)-I(14) | 119.2(3) |
| C(2)-B(16)-B(22)  | 104.6(3) |
| C(2)-B(16)-B(15)  | 58.8(2)  |
| B(22)-B(16)-B(15) | 108.4(3) |
| C(2)-B(16)-B(21)  | 104.9(3) |
| B(22)-B(16)-B(21) | 60.3(3)  |
| B(15)-B(16)-B(21) | 60.2(3)  |

|                   |          |
|-------------------|----------|
| C(2)-B(16)-B(17)  | 58.3(3)  |
| B(22)-B(16)-B(17) | 59.9(3)  |
| B(15)-B(16)-B(17) | 107.9(3) |
| B(21)-B(16)-B(17) | 108.1(4) |
| C(2)-B(16)-I(15)  | 124.9(3) |
| B(22)-B(16)-I(15) | 121.5(3) |
| B(15)-B(16)-I(15) | 122.5(3) |
| B(21)-B(16)-I(15) | 122.9(3) |
| B(17)-B(16)-I(15) | 120.5(3) |
| C(2)-B(17)-B(18)  | 105.0(3) |
| C(2)-B(17)-B(22)  | 105.0(3) |
| B(18)-B(17)-B(22) | 60.3(3)  |
| C(2)-B(17)-B(16)  | 59.1(3)  |
| B(18)-B(17)-B(16) | 108.1(3) |
| B(22)-B(17)-B(16) | 59.7(3)  |
| C(2)-B(17)-B(13)  | 58.9(3)  |
| B(18)-B(17)-B(13) | 60.0(3)  |
| B(22)-B(17)-B(13) | 108.3(3) |
| B(16)-B(17)-B(13) | 108.4(3) |
| C(2)-B(17)-I(16)  | 120.4(3) |
| B(18)-B(17)-I(16) | 125.4(3) |
| B(22)-B(17)-I(16) | 125.6(3) |
| B(16)-B(17)-I(16) | 120.2(3) |
| B(13)-B(17)-I(16) | 119.8(3) |
| B(17)-B(18)-B(13) | 60.4(3)  |
| B(17)-B(18)-B(22) | 60.0(3)  |
| B(13)-B(18)-B(22) | 108.4(3) |
| B(17)-B(18)-B(23) | 107.9(4) |
| B(13)-B(18)-B(23) | 107.8(3) |
| B(22)-B(18)-B(23) | 60.0(3)  |
| B(17)-B(18)-B(19) | 108.1(3) |
| B(13)-B(18)-B(19) | 60.0(3)  |
| B(22)-B(18)-B(19) | 107.9(4) |
| B(23)-B(18)-B(19) | 59.7(3)  |
| B(17)-B(18)-I(17) | 120.8(3) |
| B(13)-B(18)-I(17) | 119.9(3) |

|                   |          |
|-------------------|----------|
| B(22)-B(18)-I(17) | 122.7(3) |
| B(23)-B(18)-I(17) | 123.4(3) |
| B(19)-B(18)-I(17) | 121.6(3) |
| B(14)-B(19)-B(20) | 59.8(3)  |
| B(14)-B(19)-B(23) | 107.8(4) |
| B(20)-B(19)-B(23) | 60.3(3)  |
| B(14)-B(19)-B(13) | 60.1(3)  |
| B(20)-B(19)-B(13) | 107.8(3) |
| B(23)-B(19)-B(13) | 107.3(3) |
| B(14)-B(19)-B(18) | 107.3(3) |
| B(20)-B(19)-B(18) | 107.7(3) |
| B(23)-B(19)-B(18) | 59.7(3)  |
| B(13)-B(19)-B(18) | 59.2(3)  |
| B(14)-B(19)-I(18) | 119.7(3) |
| B(20)-B(19)-I(18) | 121.7(3) |
| B(23)-B(19)-I(18) | 124.1(3) |
| B(13)-B(19)-I(18) | 120.7(3) |
| B(18)-B(19)-I(18) | 123.6(3) |
| B(14)-B(20)-B(15) | 60.5(3)  |
| B(14)-B(20)-B(19) | 60.0(3)  |
| B(15)-B(20)-B(19) | 108.3(3) |
| B(14)-B(20)-B(21) | 108.3(3) |
| B(15)-B(20)-B(21) | 60.0(3)  |
| B(19)-B(20)-B(21) | 107.9(3) |
| B(14)-B(20)-B(23) | 107.7(3) |
| B(15)-B(20)-B(23) | 107.4(3) |
| B(19)-B(20)-B(23) | 59.9(3)  |
| B(21)-B(20)-B(23) | 59.5(3)  |
| B(14)-B(20)-I(19) | 122.0(3) |
| B(15)-B(20)-I(19) | 121.1(3) |
| B(19)-B(20)-I(19) | 122.4(3) |
| B(21)-B(20)-I(19) | 121.0(3) |
| B(23)-B(20)-I(19) | 122.3(3) |
| B(16)-B(21)-B(23) | 107.9(4) |
| B(16)-B(21)-B(22) | 59.7(3)  |
| B(23)-B(21)-B(22) | 60.2(3)  |

|                   |          |
|-------------------|----------|
| B(16)-B(21)-B(15) | 59.8(3)  |
| B(23)-B(21)-B(15) | 107.9(3) |
| B(22)-B(21)-B(15) | 107.6(3) |
| B(16)-B(21)-B(20) | 107.7(3) |
| B(23)-B(21)-B(20) | 60.4(3)  |
| B(22)-B(21)-B(20) | 108.3(4) |
| B(15)-B(21)-B(20) | 59.7(3)  |
| B(16)-B(21)-I(20) | 120.8(3) |
| B(23)-B(21)-I(20) | 123.3(3) |
| B(22)-B(21)-I(20) | 122.7(3) |
| B(15)-B(21)-I(20) | 120.4(3) |
| B(20)-B(21)-I(20) | 121.7(3) |
| B(16)-B(22)-B(17) | 60.3(3)  |
| B(16)-B(22)-B(18) | 108.2(3) |
| B(17)-B(22)-B(18) | 59.7(3)  |
| B(16)-B(22)-B(21) | 60.0(3)  |
| B(17)-B(22)-B(21) | 108.2(3) |
| B(18)-B(22)-B(21) | 108.2(3) |
| B(16)-B(22)-B(23) | 107.8(3) |
| B(17)-B(22)-B(23) | 107.8(3) |
| B(18)-B(22)-B(23) | 60.2(3)  |
| B(21)-B(22)-B(23) | 59.8(3)  |
| B(16)-B(22)-I(21) | 120.4(3) |
| B(17)-B(22)-I(21) | 120.6(3) |
| B(18)-B(22)-I(21) | 122.2(3) |
| B(21)-B(22)-I(21) | 122.0(3) |
| B(23)-B(22)-I(21) | 123.3(3) |
| B(21)-B(23)-B(22) | 60.0(3)  |
| B(21)-B(23)-B(19) | 108.3(3) |
| B(22)-B(23)-B(19) | 108.4(3) |
| B(21)-B(23)-B(18) | 108.0(3) |
| B(22)-B(23)-B(18) | 59.7(3)  |
| B(19)-B(23)-B(18) | 60.6(3)  |
| B(21)-B(23)-B(20) | 60.2(3)  |
| B(22)-B(23)-B(20) | 108.0(4) |
| B(19)-B(23)-B(20) | 59.8(3)  |

|                   |          |
|-------------------|----------|
| B(18)-B(23)-B(20) | 108.0(3) |
| B(21)-B(23)-I(22) | 121.7(3) |
| B(22)-B(23)-I(22) | 122.6(3) |
| B(19)-B(23)-I(22) | 120.8(3) |
| B(18)-B(23)-I(22) | 122.1(3) |
| B(20)-B(23)-I(22) | 121.0(3) |
| B(24)-C(3)-B(25)  | 62.6(3)  |
| B(24)-C(3)-B(28)  | 62.7(3)  |
| B(25)-C(3)-B(28)  | 114.9(3) |
| B(24)-C(3)-B(27)  | 114.5(3) |
| B(25)-C(3)-B(27)  | 115.0(3) |
| B(28)-C(3)-B(27)  | 62.8(3)  |
| B(24)-C(3)-B(26)  | 114.7(3) |
| B(25)-C(3)-B(26)  | 63.1(3)  |
| B(28)-C(3)-B(26)  | 114.7(3) |
| B(27)-C(3)-B(26)  | 62.6(3)  |
| B(24)-C(3)-H(3)   | 118.4(8) |
| B(25)-C(3)-H(3)   | 117.5(8) |
| B(28)-C(3)-H(3)   | 117.9(8) |
| B(27)-C(3)-H(3)   | 117.4(8) |
| B(26)-C(3)-H(3)   | 117.2(8) |
| C(3)-B(24)-B(30)  | 105.0(3) |
| C(3)-B(24)-B(29)  | 104.7(3) |
| B(30)-B(24)-B(29) | 60.1(3)  |
| C(3)-B(24)-B(25)  | 58.8(2)  |
| B(30)-B(24)-B(25) | 60.4(3)  |
| B(29)-B(24)-B(25) | 108.4(3) |
| C(3)-B(24)-B(28)  | 58.8(2)  |
| B(30)-B(24)-B(28) | 108.5(3) |
| B(29)-B(24)-B(28) | 60.2(3)  |
| B(25)-B(24)-B(28) | 108.5(3) |
| C(3)-B(24)-I(23)  | 123.0(3) |
| B(30)-B(24)-I(23) | 123.1(3) |
| B(29)-B(24)-I(23) | 124.2(3) |
| B(25)-B(24)-I(23) | 119.8(3) |
| B(28)-B(24)-I(23) | 121.2(3) |



|                   |          |
|-------------------|----------|
| C(3)-B(25)-B(31)  | 104.5(3) |
| C(3)-B(25)-B(24)  | 58.6(2)  |
| B(31)-B(25)-B(24) | 108.1(3) |
| C(3)-B(25)-B(30)  | 104.4(3) |
| B(31)-B(25)-B(30) | 60.4(3)  |
| B(24)-B(25)-B(30) | 59.7(3)  |
| C(3)-B(25)-B(26)  | 58.7(2)  |
| B(31)-B(25)-B(26) | 59.6(3)  |
| B(24)-B(25)-B(26) | 107.8(3) |
| B(30)-B(25)-B(26) | 107.7(3) |
| C(3)-B(25)-I(24)  | 120.4(3) |
| B(31)-B(25)-I(24) | 126.3(3) |
| B(24)-B(25)-I(24) | 119.4(3) |
| B(30)-B(25)-I(24) | 125.7(3) |
| B(26)-B(25)-I(24) | 120.8(3) |
| C(3)-B(26)-B(32)  | 105.0(3) |
| C(3)-B(26)-B(31)  | 104.2(3) |
| B(32)-B(26)-B(31) | 60.9(3)  |
| C(3)-B(26)-B(27)  | 58.6(2)  |
| B(32)-B(26)-B(27) | 60.3(3)  |
| B(31)-B(26)-B(27) | 108.5(3) |
| C(3)-B(26)-B(25)  | 58.2(2)  |
| B(32)-B(26)-B(25) | 108.5(3) |
| B(31)-B(26)-B(25) | 59.7(3)  |
| B(27)-B(26)-B(25) | 107.7(3) |
| C(3)-B(26)-I(25)  | 122.8(3) |
| B(32)-B(26)-I(25) | 123.5(3) |
| B(31)-B(26)-I(25) | 124.1(3) |
| B(27)-B(26)-I(25) | 120.6(3) |
| B(25)-B(26)-I(25) | 121.0(3) |
| C(3)-B(27)-B(33)  | 104.6(3) |
| C(3)-B(27)-B(32)  | 104.5(3) |
| B(33)-B(27)-B(32) | 60.6(3)  |
| C(3)-B(27)-B(26)  | 58.8(2)  |
| B(33)-B(27)-B(26) | 107.9(3) |
| B(32)-B(27)-B(26) | 59.3(3)  |

|                   |          |
|-------------------|----------|
| C(3)-B(27)-B(28)  | 58.5(2)  |
| B(33)-B(27)-B(28) | 60.2(3)  |
| B(32)-B(27)-B(28) | 108.7(3) |
| B(26)-B(27)-B(28) | 108.2(3) |
| C(3)-B(27)-I(26)  | 121.2(3) |
| B(33)-B(27)-I(26) | 125.0(3) |
| B(32)-B(27)-I(26) | 125.4(3) |
| B(26)-B(27)-I(26) | 120.8(3) |
| B(28)-B(27)-I(26) | 119.5(3) |
| C(3)-B(28)-B(24)  | 58.6(2)  |
| C(3)-B(28)-B(29)  | 104.3(3) |
| B(24)-B(28)-B(29) | 59.8(3)  |
| C(3)-B(28)-B(33)  | 104.1(3) |
| B(24)-B(28)-B(33) | 107.7(3) |
| B(29)-B(28)-B(33) | 60.1(3)  |
| C(3)-B(28)-B(27)  | 58.7(2)  |
| B(24)-B(28)-B(27) | 107.9(3) |
| B(29)-B(28)-B(27) | 107.7(3) |
| B(33)-B(28)-B(27) | 59.4(2)  |
| C(3)-B(28)-I(27)  | 121.8(3) |
| B(24)-B(28)-I(27) | 120.5(3) |
| B(29)-B(28)-I(27) | 125.0(3) |
| B(33)-B(28)-I(27) | 125.2(3) |
| B(27)-B(28)-I(27) | 120.6(3) |
| B(24)-B(29)-B(30) | 60.0(3)  |
| B(24)-B(29)-B(28) | 60.0(3)  |
| B(30)-B(29)-B(28) | 108.3(3) |
| B(24)-B(29)-B(33) | 107.8(3) |
| B(30)-B(29)-B(33) | 108.1(3) |
| B(28)-B(29)-B(33) | 60.0(3)  |
| B(24)-B(29)-B(34) | 107.8(3) |
| B(30)-B(29)-B(34) | 60.3(3)  |
| B(28)-B(29)-B(34) | 107.8(3) |
| B(33)-B(29)-B(34) | 59.7(3)  |
| B(24)-B(29)-I(28) | 121.1(3) |
| B(30)-B(29)-I(28) | 122.5(3) |

|                   |          |
|-------------------|----------|
| B(28)-B(29)-I(28) | 120.1(3) |
| B(33)-B(29)-I(28) | 121.6(3) |
| B(34)-B(29)-I(28) | 123.3(3) |
| B(24)-B(30)-B(29) | 60.0(3)  |
| B(24)-B(30)-B(25) | 59.9(2)  |
| B(29)-B(30)-B(25) | 108.0(3) |
| B(24)-B(30)-B(34) | 107.8(3) |
| B(29)-B(30)-B(34) | 60.2(3)  |
| B(25)-B(30)-B(34) | 107.5(3) |
| B(24)-B(30)-B(31) | 107.5(3) |
| B(29)-B(30)-B(31) | 108.2(3) |
| B(25)-B(30)-B(31) | 59.5(2)  |
| B(34)-B(30)-B(31) | 60.0(3)  |
| B(24)-B(30)-I(29) | 121.4(3) |
| B(29)-B(30)-I(29) | 122.6(3) |
| B(25)-B(30)-I(29) | 120.6(3) |
| B(34)-B(30)-I(29) | 123.1(3) |
| B(31)-B(30)-I(29) | 121.5(3) |
| B(26)-B(31)-B(25) | 60.8(3)  |
| B(26)-B(31)-B(34) | 107.2(3) |
| B(25)-B(31)-B(34) | 107.9(3) |
| B(26)-B(31)-B(30) | 108.4(3) |
| B(25)-B(31)-B(30) | 60.1(3)  |
| B(34)-B(31)-B(30) | 59.9(3)  |
| B(26)-B(31)-B(32) | 59.3(3)  |
| B(25)-B(31)-B(32) | 108.2(3) |
| B(34)-B(31)-B(32) | 59.7(3)  |
| B(30)-B(31)-B(32) | 108.0(3) |
| B(26)-B(31)-I(30) | 120.9(3) |
| B(25)-B(31)-I(30) | 119.4(3) |
| B(34)-B(31)-I(30) | 123.9(3) |
| B(30)-B(31)-I(30) | 121.2(3) |
| B(32)-B(31)-I(30) | 123.3(3) |
| B(26)-B(32)-B(34) | 107.9(3) |
| B(26)-B(32)-B(27) | 60.4(3)  |
| B(34)-B(32)-B(27) | 107.2(3) |

|                   |          |
|-------------------|----------|
| B(26)-B(32)-B(31) | 59.8(3)  |
| B(34)-B(32)-B(31) | 60.1(3)  |
| B(27)-B(32)-B(31) | 107.7(3) |
| B(26)-B(32)-B(33) | 107.7(3) |
| B(34)-B(32)-B(33) | 59.6(3)  |
| B(27)-B(32)-B(33) | 59.3(3)  |
| B(31)-B(32)-B(33) | 107.5(3) |
| B(26)-B(32)-I(31) | 121.6(3) |
| B(34)-B(32)-I(31) | 122.5(3) |
| B(27)-B(32)-I(31) | 121.2(3) |
| B(31)-B(32)-I(31) | 122.7(3) |
| B(33)-B(32)-I(31) | 121.7(3) |
| B(27)-B(33)-B(34) | 108.1(3) |
| B(27)-B(33)-B(28) | 60.3(3)  |
| B(34)-B(33)-B(28) | 108.1(3) |
| B(27)-B(33)-B(29) | 108.2(3) |
| B(34)-B(33)-B(29) | 60.2(3)  |
| B(28)-B(33)-B(29) | 59.9(3)  |
| B(27)-B(33)-B(32) | 60.1(3)  |
| B(34)-B(33)-B(32) | 59.9(3)  |
| B(28)-B(33)-B(32) | 108.3(3) |
| B(29)-B(33)-B(32) | 108.2(3) |
| B(27)-B(33)-I(32) | 118.9(3) |
| B(34)-B(33)-I(32) | 123.8(3) |
| B(28)-B(33)-I(32) | 120.7(3) |
| B(29)-B(33)-I(32) | 123.8(3) |
| B(32)-B(33)-I(32) | 120.7(3) |
| B(33)-B(34)-B(32) | 60.5(3)  |
| B(33)-B(34)-B(29) | 60.1(3)  |
| B(32)-B(34)-B(29) | 108.6(3) |
| B(33)-B(34)-B(30) | 107.9(3) |
| B(32)-B(34)-B(30) | 108.5(3) |
| B(29)-B(34)-B(30) | 59.5(3)  |
| B(33)-B(34)-B(31) | 108.3(3) |
| B(32)-B(34)-B(31) | 60.2(3)  |
| B(29)-B(34)-B(31) | 107.7(3) |

|                     |           |
|---------------------|-----------|
| B(30)-B(34)-B(31)   | 60.0(3)   |
| B(33)-B(34)-I(33)   | 120.1(3)  |
| B(32)-B(34)-I(33)   | 121.2(3)  |
| B(29)-B(34)-I(33)   | 120.9(3)  |
| B(30)-B(34)-I(33)   | 122.6(3)  |
| B(31)-B(34)-I(33)   | 123.2(3)  |
| H(1WA)-O(1)-H(1WB)  | 107.3(13) |
| H(2WA)-O(2)-H(2WB)  | 107.2(14) |
| H(3WA)-O(3)-H(3WB)  | 107.4(13) |
| H(4WA)-O(4)-H(4WB)  | 107.1(14) |
| H(5WA)-O(5)-H(5WB)  | 107.5(13) |
| H(6WA)-O(6)-H(6WB)  | 116.8(16) |
| H(6WA)-O(6)-H(6WC)  | 117.1(15) |
| H(6WB)-O(6)-H(6WC)  | 117.8(18) |
| H(7WA)-O(7)-H(7WB)  | 107.0(14) |
| H(8WA)-O(8)-H(8WB)  | 107.3(14) |
| H(9WA)-O(9)-H(9WB)  | 107.2(14) |
| H(10C)-O(10)-H(10A) | 118.9(16) |
| H(10C)-O(10)-H(10B) | 119.9(19) |
| H(10A)-O(10)-H(10B) | 107.0(14) |
| H(10C)-O(10)-H(10C) | 0.0       |
| H(10A)-O(10)-H(10C) | 118.9(16) |
| H(10B)-O(10)-H(10C) | 119.9(19) |
| H(11A)-O(11)-H(11B) | 106.9(14) |
| H(12A)-O(12)-H(12B) | 106.1(13) |
| H(13A)-O(13)-H(13B) | 107.5(14) |
| H(14A)-O(14)-H(14B) | 108.0(14) |
| H(15A)-O(15)-H(15B) | 108.1(14) |
| H(16A)-O(16)-H(16B) | 109(2)    |
| H(16A)-O(16)-H(16C) | 108.2(19) |
| H(16B)-O(16)-H(16C) | 108(2)    |
| H(17A)-O(17)-H(17B) | 107.4(14) |
| H(18A)-O(18)-H(18B) | 106.7(14) |
| H(19A)-O(19)-H(19B) | 106.4(14) |
| H(20A)-O(20)-H(20B) | 107.3(13) |
| H(21A)-O(21)-H(21B) | 105.8(14) |

|                      |           |
|----------------------|-----------|
| H(22A)-O(22)-H(22B)  | 106.8(13) |
| H(22C)-O(22D)-H(22D) | 105.7(14) |
| H(23A)-O(23)-H(23B)  | 106.9(14) |
| H(23A)-O(23D)-H(23C) | 96(5)     |
| H(23A)-O(23D)-H(23D) | 135(5)    |
| H(23C)-O(23D)-H(23D) | 107.1(15) |
| H(24A)-O(24)-H(24B)  | 107.3(15) |

---

Symmetry transformations used to generate equivalent atoms:

**Table 4.** Anisotropic displacement parameters ( $\text{\AA}^2 \times 10^3$ ) for cr301r\_0m-6. The anisotropic displacement factor exponent takes the form:  $-2\pi^2 [ h^2 a^{*2} U^{11} + \dots + 2 h k a^* b^* U^{12} ]$

|       | U <sup>11</sup> | U <sup>22</sup> | U <sup>33</sup> | U <sup>23</sup> | U <sup>13</sup> | U <sup>12</sup> |
|-------|-----------------|-----------------|-----------------|-----------------|-----------------|-----------------|
| C(1)  | 10(2)           | 17(2)           | 11(2)           | 0(1)            | 1(1)            | -4(1)           |
| B(2)  | 10(2)           | 16(2)           | 11(2)           | 0(2)            | -1(2)           | -3(2)           |
| B(3)  | 12(2)           | 17(2)           | 10(2)           | 2(2)            | -1(2)           | -3(2)           |
| B(4)  | 11(2)           | 21(2)           | 14(2)           | 1(2)            | -1(2)           | -4(2)           |
| B(5)  | 10(2)           | 19(2)           | 12(2)           | 4(2)            | -4(2)           | -2(2)           |
| B(6)  | 14(2)           | 21(2)           | 13(2)           | 1(2)            | -2(2)           | -5(2)           |
| B(7)  | 15(2)           | 16(2)           | 13(2)           | 3(2)            | -1(2)           | -3(2)           |
| B(8)  | 12(2)           | 21(2)           | 12(2)           | 1(2)            | 0(2)            | -4(2)           |
| B(9)  | 10(2)           | 19(2)           | 13(2)           | 3(2)            | -1(2)           | 0(2)            |
| B(10) | 10(2)           | 21(2)           | 12(2)           | 1(2)            | 2(2)            | -4(2)           |
| B(11) | 15(2)           | 16(2)           | 15(2)           | 3(2)            | -3(2)           | -1(2)           |
| B(12) | 14(2)           | 20(2)           | 11(2)           | 3(2)            | -1(2)           | -1(2)           |
| I(1)  | 12(1)           | 22(1)           | 15(1)           | 1(1)            | 0(1)            | -6(1)           |
| I(2)  | 12(1)           | 17(1)           | 17(1)           | 1(1)            | -2(1)           | 0(1)            |
| I(3)  | 18(1)           | 17(1)           | 21(1)           | 0(1)            | -1(1)           | -7(1)           |
| I(4)  | 14(1)           | 26(1)           | 16(1)           | -2(1)           | -6(1)           | -4(1)           |
| I(5)  | 19(1)           | 27(1)           | 13(1)           | 7(1)            | -3(1)           | -8(1)           |
| I(6)  | 29(1)           | 15(1)           | 23(1)           | 1(1)            | -5(1)           | -5(1)           |
| I(7)  | 19(1)           | 20(1)           | 14(1)           | -2(1)           | -5(1)           | -4(1)           |
| I(8)  | 17(1)           | 26(1)           | 13(1)           | 6(1)            | 0(1)            | -3(1)           |
| I(9)  | 10(1)           | 31(1)           | 21(1)           | 7(1)            | 0(1)            | -4(1)           |
| I(10) | 18(1)           | 25(1)           | 22(1)           | 4(1)            | -4(1)           | 5(1)            |
| I(11) | 22(1)           | 26(1)           | 16(1)           | -4(1)           | 2(1)            | 4(1)            |
| C(2)  | 12(2)           | 18(2)           | 15(2)           | 9(2)            | 0(2)            | -1(2)           |
| B(13) | 12(2)           | 21(2)           | 15(2)           | 5(2)            | 0(2)            | -4(2)           |
| B(14) | 11(2)           | 23(2)           | 18(2)           | 7(2)            | 2(2)            | -4(2)           |
| B(15) | 12(2)           | 21(2)           | 23(2)           | 5(2)            | -2(2)           | -5(2)           |
| B(16) | 12(2)           | 29(2)           | 15(2)           | 11(2)           | -3(2)           | -4(2)           |
| B(17) | 12(2)           | 20(2)           | 17(2)           | 7(2)            | 0(2)            | -3(2)           |
| B(18) | 12(2)           | 27(2)           | 15(2)           | 6(2)            | -4(2)           | -5(2)           |
| B(19) | 10(2)           | 27(2)           | 19(2)           | 9(2)            | -2(2)           | -6(2)           |

|       |       |       |       |       |       |        |
|-------|-------|-------|-------|-------|-------|--------|
| B(20) | 13(2) | 24(2) | 22(2) | 6(2)  | -2(2) | -2(2)  |
| B(21) | 15(2) | 26(2) | 20(2) | 10(2) | -3(2) | -4(2)  |
| B(22) | 11(2) | 27(2) | 17(2) | 10(2) | -2(2) | -7(2)  |
| B(23) | 12(2) | 27(2) | 17(2) | 10(2) | -2(2) | -4(2)  |
| I(12) | 17(1) | 19(1) | 17(1) | 4(1)  | 1(1)  | -5(1)  |
| I(13) | 16(1) | 25(1) | 23(1) | 6(1)  | 7(1)  | -3(1)  |
| I(14) | 24(1) | 23(1) | 27(1) | 1(1)  | 0(1)  | -4(1)  |
| I(15) | 16(1) | 32(1) | 23(1) | 12(1) | -5(1) | -12(1) |
| I(16) | 11(1) | 27(1) | 24(1) | 11(1) | -1(1) | -1(1)  |
| I(17) | 27(1) | 33(1) | 19(1) | -1(1) | 0(1)  | -2(1)  |
| I(18) | 16(1) | 43(1) | 32(1) | 5(1)  | -6(1) | -13(1) |
| I(19) | 13(1) | 31(1) | 41(1) | 13(1) | -2(1) | 2(1)   |
| I(20) | 21(1) | 27(1) | 37(1) | 19(1) | -4(1) | -7(1)  |
| I(21) | 15(1) | 42(1) | 19(1) | 14(1) | 3(1)  | -5(1)  |
| I(22) | 19(1) | 44(1) | 19(1) | 13(1) | -6(1) | -4(1)  |
| C(3)  | 12(2) | 13(2) | 10(2) | -1(1) | 0(1)  | -3(1)  |
| B(24) | 12(2) | 16(2) | 14(2) | 3(2)  | -2(2) | -1(2)  |
| B(25) | 10(2) | 19(2) | 10(2) | -1(2) | -1(2) | -1(2)  |
| B(26) | 13(2) | 17(2) | 11(2) | 0(2)  | 0(2)  | -2(2)  |
| B(27) | 13(2) | 17(2) | 15(2) | 1(2)  | -2(2) | -5(2)  |
| B(28) | 16(2) | 16(2) | 12(2) | 5(2)  | -2(2) | -2(2)  |
| B(29) | 10(2) | 16(2) | 16(2) | 1(2)  | -2(2) | -3(2)  |
| B(30) | 14(2) | 14(2) | 17(2) | -2(2) | -2(2) | -3(2)  |
| B(31) | 16(2) | 17(2) | 15(2) | -2(2) | -2(2) | -1(2)  |
| B(32) | 11(2) | 19(2) | 11(2) | 2(2)  | 0(2)  | -2(2)  |
| B(33) | 9(2)  | 16(2) | 14(2) | 1(2)  | 0(2)  | -1(2)  |
| B(34) | 11(2) | 19(2) | 12(2) | 0(2)  | -1(2) | -3(2)  |
| I(23) | 13(1) | 21(1) | 14(1) | 1(1)  | 2(1)  | -5(1)  |
| I(24) | 11(1) | 29(1) | 18(1) | 2(1)  | -3(1) | 1(1)   |
| I(25) | 21(1) | 17(1) | 15(1) | 4(1)  | -2(1) | 0(1)   |
| I(26) | 18(1) | 19(1) | 18(1) | 0(1)  | -3(1) | -8(1)  |
| I(27) | 18(1) | 25(1) | 10(1) | 2(1)  | -3(1) | -4(1)  |
| I(28) | 20(1) | 16(1) | 25(1) | 7(1)  | 0(1)  | -2(1)  |
| I(29) | 17(1) | 23(1) | 23(1) | -6(1) | -1(1) | -9(1)  |
| I(30) | 18(1) | 26(1) | 11(1) | -3(1) | -3(1) | 0(1)   |
| I(31) | 14(1) | 26(1) | 15(1) | 2(1)  | 3(1)  | -5(1)  |



|        |         |         |         |         |         |         |
|--------|---------|---------|---------|---------|---------|---------|
| I(32)  | 11(1)   | 25(1)   | 20(1)   | 3(1)    | -4(1)   | 0(1)    |
| I(33)  | 16(1)   | 20(1)   | 23(1)   | -7(1)   | 1(1)    | 0(1)    |
| O(1)   | 72(4)   | 72(3)   | 47(3)   | 17(3)   | -5(3)   | 13(3)   |
| O(2)   | 47(3)   | 54(3)   | 87(4)   | 6(3)    | 38(3)   | 4(2)    |
| O(3)   | 45(3)   | 58(3)   | 87(4)   | 13(3)   | -19(3)  | -6(2)   |
| O(4)   | 59(3)   | 58(3)   | 57(3)   | 11(2)   | -1(2)   | -4(2)   |
| O(5)   | 39(2)   | 73(3)   | 58(3)   | -13(3)  | 1(2)    | -16(2)  |
| O(6)   | 68(3)   | 63(3)   | 43(3)   | -6(2)   | -1(2)   | -3(3)   |
| O(7)   | 46(3)   | 57(3)   | 57(3)   | 14(2)   | -6(2)   | 3(2)    |
| O(8)   | 53(3)   | 41(2)   | 38(2)   | 8(2)    | -5(2)   | 10(2)   |
| O(9)   | 40(2)   | 36(2)   | 61(3)   | 4(2)    | 2(2)    | 0(2)    |
| O(10)  | 101(5)  | 51(3)   | 85(4)   | -11(3)  | -5(4)   | 7(3)    |
| O(11)  | 83(4)   | 53(3)   | 90(4)   | -19(3)  | -3(3)   | 1(3)    |
| O(12)  | 53(3)   | 70(4)   | 109(5)  | 29(3)   | 4(3)    | 2(3)    |
| O(13)  | 43(2)   | 32(2)   | 48(2)   | 1(2)    | -17(2)  | 4(2)    |
| O(14)  | 41(2)   | 59(3)   | 39(2)   | -17(2)  | 4(2)    | -9(2)   |
| O(15)  | 41(2)   | 49(2)   | 61(3)   | 18(2)   | 2(2)    | -12(2)  |
| O(16)  | 86(4)   | 84(4)   | 109(5)  | 25(4)   | 49(4)   | 14(4)   |
| O(17)  | 186(8)  | 53(4)   | 106(6)  | -31(4)  | 47(5)   | -12(4)  |
| O(18)  | 156(7)  | 79(4)   | 84(5)   | -23(4)  | 9(5)    | -52(4)  |
| O(19)  | 189(9)  | 79(5)   | 125(7)  | 7(5)    | 32(7)   | 7(6)    |
| O(20)  | 85(5)   | 47(3)   | 229(9)  | -3(4)   | -67(5)  | -5(3)   |
| O(21)  | 131(8)  | 109(7)  | 103(7)  | 39(5)   | -72(6)  | -46(6)  |
| O(22)  | 118(12) | 95(11)  | 178(17) | -22(11) | -78(12) | -6(10)  |
| O(22D) | 77(7)   | 59(6)   | 45(5)   | 5(5)    | -17(5)  | -5(6)   |
| O(23)  | 86(8)   | 61(7)   | 100(10) | 25(7)   | -20(7)  | 0(6)    |
| O(23D) | 106(11) | 139(13) | 97(11)  | -5(10)  | 22(9)   | -31(10) |
| O(24)  | 101(12) | 69(10)  | 161(17) | -52(10) | -92(12) | 19(9)   |

---

**Table 5.** Hydrogen coordinates ( $\times 10^4$ ) and isotropic displacement parameters ( $\text{\AA}^2 \times 10^{-3}$ ) for cr301r\_0m-6.

|        | x         | y        | z        | U(eq) |
|--------|-----------|----------|----------|-------|
| H(1)   | 5641(12)  | 9198(5)  | 5006(5)  | 15    |
| H(2)   | 1474(13)  | 1987(6)  | 3448(4)  | 19    |
| H(3)   | 5612(12)  | 5363(5)  | 559(5)   | 14    |
| H(1WA) | 2900(50)  | 4417(8)  | 3673(8)  | 80    |
| H(1WB) | 3310(30)  | 4507(12) | 3007(6)  | 80    |
| H(2WA) | 1561(17)  | 7152(15) | 3666(18) | 80    |
| H(2WB) | 3000(30)  | 6990(30) | 3295(13) | 80    |
| H(3WA) | 2840(30)  | 6485(11) | 5146(5)  | 76    |
| H(3WB) | 2510(20)  | 6534(10) | 4494(7)  | 76    |
| H(4WA) | 6673(14)  | 4730(30) | 3360(11) | 71    |
| H(4WB) | 5053(18)  | 4740(30) | 3339(10) | 71    |
| H(5WA) | 1664(16)  | 5813(13) | 4950(11) | 67    |
| H(5WB) | 176(18)   | 5590(20) | 4975(10) | 67    |
| H(6WA) | 1940(20)  | 6157(7)  | 3770(13) | 70    |
| H(6WB) | 624(17)   | 5760(14) | 3660(20) | 70    |
| H(6WC) | 2260(20)  | 5378(9)  | 3640(20) | 70    |
| H(7WA) | 2250(20)  | 4075(14) | 4541(16) | 66    |
| H(7WB) | 3160(40)  | 3494(8)  | 4230(20) | 66    |
| H(8WA) | 7640(30)  | 5186(14) | 2558(10) | 55    |
| H(8WB) | 8510(50)  | 4539(9)  | 2747(16) | 55    |
| H(9WA) | 6180(50)  | 3906(8)  | 3917(12) | 56    |
| H(9WB) | 6320(60)  | 3161(6)  | 4000(14) | 56    |
| H(10A) | 4380(30)  | 5711(11) | 4498(11) | 97    |
| H(10B) | 5340(60)  | 5151(14) | 4176(6)  | 97    |
| H(10C) | 5000      | 5000     | 5000     | 97    |
| H(11A) | -1320(40) | 5484(9)  | 3333(17) | 91    |
| H(11B) | -1760(20) | 6158(14) | 3610(30) | 91    |
| H(12A) | 1950(30)  | 4777(10) | 5276(15) | 96    |
| H(12B) | 1370(30)  | 4174(15) | 5567(9)  | 96    |
| H(13A) | 3580(40)  | 9272(11) | 2661(10) | 49    |

|        |           |           |           |     |
|--------|-----------|-----------|-----------|-----|
| H(13B) | 3090(60)  | 9979(5)   | 2458(15)  | 49  |
| H(14A) | 1150(30)  | 9327(15)  | 2428(8)   | 55  |
| H(14B) | 680(30)   | 9486(11)  | 1803(9)   | 55  |
| H(15A) | 1850(40)  | 11872(16) | 305(8)    | 61  |
| H(15B) | 2490(50)  | 12099(11) | -305(14)  | 61  |
| H(16A) | 3850(30)  | 11119(10) | -49(18)   | 120 |
| H(16B) | 4860(20)  | 10730(20) | 383(12)   | 120 |
| H(16C) | 3275(19)  | 10619(16) | 404(12)   | 120 |
| H(17A) | 3621(12)  | 9080(15)  | 1472(14)  | 142 |
| H(17B) | 4800(40)  | 9523(13)  | 1440(40)  | 142 |
| H(18A) | 2620(30)  | 9480(20)  | 780(12)   | 124 |
| H(18B) | 2770(30)  | 9774(19)  | 151(9)    | 124 |
| H(19A) | 6420(20)  | 10545(11) | 927(11)   | 164 |
| H(19B) | 5170(40)  | 10950(30) | 1278(10)  | 164 |
| H(20A) | -20(40)   | 11113(6)  | -101(7)   | 141 |
| H(20B) | -440(100) | 11857(7)  | -148(12)  | 141 |
| H(21A) | 2080(50)  | 8639(16)  | -300(12)  | 130 |
| H(21B) | 1370(50)  | 9334(8)   | -450(16)  | 130 |
| H(22A) | 450(140)  | 9649(10)  | 652(18)   | 152 |
| H(22B) | 680(110)  | 8947(7)   | 910(20)   | 152 |
| H(22C) | 1060(40)  | 10198(13) | -1380(12) | 72  |
| H(22D) | 550(90)   | 10590(20) | -823(8)   | 72  |
| H(23A) | 7130(30)  | 9446(16)  | 1628(17)  | 100 |
| H(23B) | 7977(17)  | 9920(20)  | 1260(30)  | 100 |
| H(23C) | 7040(60)  | 8817(10)  | 1210(30)  | 137 |
| H(23D) | 6440(60)  | 9380(40)  | 810(20)   | 137 |
| H(24A) | -730(60)  | 7971(8)   | 1500(40)  | 128 |
| H(24B) | -230(80)  | 8580(30)  | 1180(30)  | 128 |

---

**Table 6.** Torsion angles [°] for cr301r\_0m-6.

---

|                     |           |
|---------------------|-----------|
| B(6)-C(1)-B(2)-B(7) | -40.2(3)  |
| B(3)-C(1)-B(2)-B(7) | 102.7(3)  |
| B(5)-C(1)-B(2)-B(7) | -3.6(4)   |
| B(4)-C(1)-B(2)-B(7) | 66.3(4)   |
| B(6)-C(1)-B(2)-B(8) | -102.8(3) |
| B(3)-C(1)-B(2)-B(8) | 40.0(3)   |
| B(5)-C(1)-B(2)-B(8) | -66.2(4)  |
| B(4)-C(1)-B(2)-B(8) | 3.7(4)    |
| B(3)-C(1)-B(2)-B(6) | 142.8(3)  |
| B(5)-C(1)-B(2)-B(6) | 36.6(3)   |
| B(4)-C(1)-B(2)-B(6) | 106.5(3)  |
| B(6)-C(1)-B(2)-B(3) | -142.8(3) |
| B(5)-C(1)-B(2)-B(3) | -106.2(3) |
| B(4)-C(1)-B(2)-B(3) | -36.4(3)  |
| B(6)-C(1)-B(2)-I(1) | 108.0(3)  |
| B(3)-C(1)-B(2)-I(1) | -109.1(3) |
| B(5)-C(1)-B(2)-I(1) | 144.6(3)  |
| B(4)-C(1)-B(2)-I(1) | -145.5(3) |
| B(6)-C(1)-B(3)-B(8) | -3.9(4)   |
| B(2)-C(1)-B(3)-B(8) | -40.2(3)  |
| B(5)-C(1)-B(3)-B(8) | 66.1(4)   |
| B(4)-C(1)-B(3)-B(8) | 102.6(3)  |
| B(6)-C(1)-B(3)-B(9) | -66.4(4)  |
| B(2)-C(1)-B(3)-B(9) | -102.6(3) |
| B(5)-C(1)-B(3)-B(9) | 3.7(4)    |
| B(4)-C(1)-B(3)-B(9) | 40.1(3)   |
| B(6)-C(1)-B(3)-B(2) | 36.2(3)   |
| B(5)-C(1)-B(3)-B(2) | 106.3(3)  |
| B(4)-C(1)-B(3)-B(2) | 142.7(3)  |
| B(6)-C(1)-B(3)-B(4) | -106.5(4) |
| B(2)-C(1)-B(3)-B(4) | -142.7(3) |
| B(5)-C(1)-B(3)-B(4) | -36.5(3)  |
| B(6)-C(1)-B(3)-I(2) | 144.2(3)  |
| B(2)-C(1)-B(3)-I(2) | 108.0(3)  |

|                      |           |
|----------------------|-----------|
| B(5)-C(1)-B(3)-I(2)  | -145.7(3) |
| B(4)-C(1)-B(3)-I(2)  | -109.3(3) |
| B(7)-B(2)-B(3)-C(1)  | -95.9(3)  |
| B(8)-B(2)-B(3)-C(1)  | -133.7(3) |
| B(6)-B(2)-B(3)-C(1)  | -32.5(3)  |
| I(1)-B(2)-B(3)-C(1)  | 112.2(3)  |
| C(1)-B(2)-B(3)-B(8)  | 133.7(3)  |
| B(7)-B(2)-B(3)-B(8)  | 37.8(3)   |
| B(6)-B(2)-B(3)-B(8)  | 101.3(3)  |
| I(1)-B(2)-B(3)-B(8)  | -114.1(3) |
| C(1)-B(2)-B(3)-B(9)  | 96.2(3)   |
| B(7)-B(2)-B(3)-B(9)  | 0.3(4)    |
| B(8)-B(2)-B(3)-B(9)  | -37.5(3)  |
| B(6)-B(2)-B(3)-B(9)  | 63.7(4)   |
| I(1)-B(2)-B(3)-B(9)  | -151.6(3) |
| C(1)-B(2)-B(3)-B(4)  | 33.1(3)   |
| B(7)-B(2)-B(3)-B(4)  | -62.8(4)  |
| B(8)-B(2)-B(3)-B(4)  | -100.7(3) |
| B(6)-B(2)-B(3)-B(4)  | 0.6(4)    |
| I(1)-B(2)-B(3)-B(4)  | 145.2(3)  |
| C(1)-B(2)-B(3)-I(2)  | -110.6(3) |
| B(7)-B(2)-B(3)-I(2)  | 153.4(3)  |
| B(8)-B(2)-B(3)-I(2)  | 115.6(3)  |
| B(6)-B(2)-B(3)-I(2)  | -143.1(3) |
| I(1)-B(2)-B(3)-I(2)  | 1.5(4)    |
| B(6)-C(1)-B(4)-B(9)  | 66.1(4)   |
| B(3)-C(1)-B(4)-B(9)  | -40.2(3)  |
| B(2)-C(1)-B(4)-B(9)  | -3.8(4)   |
| B(5)-C(1)-B(4)-B(9)  | 102.4(3)  |
| B(6)-C(1)-B(4)-B(10) | 4.2(4)    |
| B(3)-C(1)-B(4)-B(10) | -102.1(3) |
| B(2)-C(1)-B(4)-B(10) | -65.7(4)  |
| B(5)-C(1)-B(4)-B(10) | 40.5(3)   |
| B(6)-C(1)-B(4)-B(3)  | 106.2(4)  |
| B(2)-C(1)-B(4)-B(3)  | 36.3(3)   |
| B(5)-C(1)-B(4)-B(3)  | 142.6(3)  |

|                      |           |
|----------------------|-----------|
| B(6)-C(1)-B(4)-B(5)  | -36.3(3)  |
| B(3)-C(1)-B(4)-B(5)  | -142.6(3) |
| B(2)-C(1)-B(4)-B(5)  | -106.2(3) |
| B(6)-C(1)-B(4)-I(3)  | -145.7(3) |
| B(3)-C(1)-B(4)-I(3)  | 108.1(3)  |
| B(2)-C(1)-B(4)-I(3)  | 144.4(3)  |
| B(5)-C(1)-B(4)-I(3)  | -109.4(3) |
| B(8)-B(3)-B(4)-C(1)  | -96.3(3)  |
| B(9)-B(3)-B(4)-C(1)  | -133.6(3) |
| B(2)-B(3)-B(4)-C(1)  | -33.0(3)  |
| I(2)-B(3)-B(4)-C(1)  | 110.2(3)  |
| C(1)-B(3)-B(4)-B(9)  | 133.6(3)  |
| B(8)-B(3)-B(4)-B(9)  | 37.3(3)   |
| B(2)-B(3)-B(4)-B(9)  | 100.6(3)  |
| I(2)-B(3)-B(4)-B(9)  | -116.1(3) |
| C(1)-B(3)-B(4)-B(10) | 96.2(3)   |
| B(8)-B(3)-B(4)-B(10) | -0.1(4)   |
| B(9)-B(3)-B(4)-B(10) | -37.5(3)  |
| B(2)-B(3)-B(4)-B(10) | 63.1(4)   |
| I(2)-B(3)-B(4)-B(10) | -153.6(3) |
| C(1)-B(3)-B(4)-B(5)  | 33.0(3)   |
| B(8)-B(3)-B(4)-B(5)  | -63.3(4)  |
| B(9)-B(3)-B(4)-B(5)  | -100.6(3) |
| B(2)-B(3)-B(4)-B(5)  | 0.0(4)    |
| I(2)-B(3)-B(4)-B(5)  | 143.3(3)  |
| C(1)-B(3)-B(4)-I(3)  | -109.6(3) |
| B(8)-B(3)-B(4)-I(3)  | 154.0(3)  |
| B(9)-B(3)-B(4)-I(3)  | 116.7(3)  |
| B(2)-B(3)-B(4)-I(3)  | -142.7(3) |
| I(2)-B(3)-B(4)-I(3)  | 0.6(4)    |
| B(6)-C(1)-B(5)-B(11) | 39.7(3)   |
| B(3)-C(1)-B(5)-B(11) | -66.6(4)  |
| B(2)-C(1)-B(5)-B(11) | 3.2(4)    |
| B(4)-C(1)-B(5)-B(11) | -103.2(3) |
| B(3)-C(1)-B(5)-B(6)  | -106.4(4) |
| B(2)-C(1)-B(5)-B(6)  | -36.5(3)  |

|                       |           |
|-----------------------|-----------|
| B(4)-C(1)-B(5)-B(6)   | -142.9(3) |
| B(6)-C(1)-B(5)-B(10)  | 102.4(3)  |
| B(3)-C(1)-B(5)-B(10)  | -3.9(4)   |
| B(2)-C(1)-B(5)-B(10)  | 65.9(4)   |
| B(4)-C(1)-B(5)-B(10)  | -40.4(3)  |
| B(6)-C(1)-B(5)-B(4)   | 142.9(3)  |
| B(3)-C(1)-B(5)-B(4)   | 36.5(3)   |
| B(2)-C(1)-B(5)-B(4)   | 106.4(3)  |
| B(6)-C(1)-B(5)-I(4)   | -108.4(3) |
| B(3)-C(1)-B(5)-I(4)   | 145.2(3)  |
| B(2)-C(1)-B(5)-I(4)   | -144.9(3) |
| B(4)-C(1)-B(5)-I(4)   | 108.7(3)  |
| B(9)-B(4)-B(5)-C(1)   | -96.0(3)  |
| B(10)-B(4)-B(5)-C(1)  | -133.3(3) |
| B(3)-B(4)-B(5)-C(1)   | -32.9(3)  |
| I(3)-B(4)-B(5)-C(1)   | 109.3(3)  |
| C(1)-B(4)-B(5)-B(11)  | 95.6(3)   |
| B(9)-B(4)-B(5)-B(11)  | -0.4(4)   |
| B(10)-B(4)-B(5)-B(11) | -37.7(3)  |
| B(3)-B(4)-B(5)-B(11)  | 62.7(4)   |
| I(3)-B(4)-B(5)-B(11)  | -155.1(3) |
| C(1)-B(4)-B(5)-B(6)   | 32.4(3)   |
| B(9)-B(4)-B(5)-B(6)   | -63.7(4)  |
| B(10)-B(4)-B(5)-B(6)  | -100.9(3) |
| B(3)-B(4)-B(5)-B(6)   | -0.6(4)   |
| I(3)-B(4)-B(5)-B(6)   | 141.7(3)  |
| C(1)-B(4)-B(5)-B(10)  | 133.3(3)  |
| B(9)-B(4)-B(5)-B(10)  | 37.3(3)   |
| B(3)-B(4)-B(5)-B(10)  | 100.4(3)  |
| I(3)-B(4)-B(5)-B(10)  | -117.4(3) |
| C(1)-B(4)-B(5)-I(4)   | -113.0(3) |
| B(9)-B(4)-B(5)-I(4)   | 151.0(3)  |
| B(10)-B(4)-B(5)-I(4)  | 113.7(3)  |
| B(3)-B(4)-B(5)-I(4)   | -146.0(3) |
| I(3)-B(4)-B(5)-I(4)   | -3.7(4)   |
| B(3)-C(1)-B(6)-B(11)  | 66.4(4)   |

|                      |           |
|----------------------|-----------|
| B(2)-C(1)-B(6)-B(11) | 102.6(3)  |
| B(5)-C(1)-B(6)-B(11) | -39.9(3)  |
| B(4)-C(1)-B(6)-B(11) | -3.7(4)   |
| B(3)-C(1)-B(6)-B(7)  | 3.9(4)    |
| B(2)-C(1)-B(6)-B(7)  | 40.1(3)   |
| B(5)-C(1)-B(6)-B(7)  | -102.4(3) |
| B(4)-C(1)-B(6)-B(7)  | -66.2(4)  |
| B(3)-C(1)-B(6)-B(2)  | -36.2(3)  |
| B(5)-C(1)-B(6)-B(2)  | -142.5(3) |
| B(4)-C(1)-B(6)-B(2)  | -106.3(4) |
| B(3)-C(1)-B(6)-B(5)  | 106.3(3)  |
| B(2)-C(1)-B(6)-B(5)  | 142.5(3)  |
| B(4)-C(1)-B(6)-B(5)  | 36.2(3)   |
| B(3)-C(1)-B(6)-I(5)  | -144.9(3) |
| B(2)-C(1)-B(6)-I(5)  | -108.6(3) |
| B(5)-C(1)-B(6)-I(5)  | 108.9(3)  |
| B(4)-C(1)-B(6)-I(5)  | 145.1(3)  |
| B(7)-B(2)-B(6)-C(1)  | 133.9(3)  |
| B(8)-B(2)-B(6)-C(1)  | 95.7(3)   |
| B(3)-B(2)-B(6)-C(1)  | 32.7(3)   |
| I(1)-B(2)-B(6)-C(1)  | -112.2(3) |
| C(1)-B(2)-B(6)-B(11) | -97.1(3)  |
| B(7)-B(2)-B(6)-B(11) | 36.7(3)   |
| B(8)-B(2)-B(6)-B(11) | -1.4(4)   |
| B(3)-B(2)-B(6)-B(11) | -64.4(4)  |
| I(1)-B(2)-B(6)-B(11) | 150.7(3)  |
| C(1)-B(2)-B(6)-B(7)  | -133.9(3) |
| B(8)-B(2)-B(6)-B(7)  | -38.2(3)  |
| B(3)-B(2)-B(6)-B(7)  | -101.2(3) |
| I(1)-B(2)-B(6)-B(7)  | 113.9(3)  |
| C(1)-B(2)-B(6)-B(5)  | -33.7(3)  |
| B(7)-B(2)-B(6)-B(5)  | 100.2(3)  |
| B(8)-B(2)-B(6)-B(5)  | 62.0(4)   |
| B(3)-B(2)-B(6)-B(5)  | -1.0(4)   |
| I(1)-B(2)-B(6)-B(5)  | -145.9(3) |
| C(1)-B(2)-B(6)-I(5)  | 109.4(3)  |



|                       |           |
|-----------------------|-----------|
| B(7)-B(2)-B(6)-I(5)   | -116.8(3) |
| B(8)-B(2)-B(6)-I(5)   | -155.0(3) |
| B(3)-B(2)-B(6)-I(5)   | 142.0(3)  |
| I(1)-B(2)-B(6)-I(5)   | -2.9(4)   |
| B(11)-B(5)-B(6)-C(1)  | -134.2(3) |
| B(10)-B(5)-B(6)-C(1)  | -95.8(3)  |
| B(4)-B(5)-B(6)-C(1)   | -32.7(3)  |
| I(4)-B(5)-B(6)-C(1)   | 112.6(3)  |
| C(1)-B(5)-B(6)-B(11)  | 134.2(3)  |
| B(10)-B(5)-B(6)-B(11) | 38.4(3)   |
| B(4)-B(5)-B(6)-B(11)  | 101.5(3)  |
| I(4)-B(5)-B(6)-B(11)  | -113.2(3) |
| C(1)-B(5)-B(6)-B(7)   | 97.0(3)   |
| B(11)-B(5)-B(6)-B(7)  | -37.2(3)  |
| B(10)-B(5)-B(6)-B(7)  | 1.3(4)    |
| B(4)-B(5)-B(6)-B(7)   | 64.3(4)   |
| I(4)-B(5)-B(6)-B(7)   | -150.4(3) |
| C(1)-B(5)-B(6)-B(2)   | 33.7(3)   |
| B(11)-B(5)-B(6)-B(2)  | -100.5(3) |
| B(10)-B(5)-B(6)-B(2)  | -62.1(4)  |
| B(4)-B(5)-B(6)-B(2)   | 1.0(4)    |
| I(4)-B(5)-B(6)-B(2)   | 146.3(3)  |
| C(1)-B(5)-B(6)-I(5)   | -109.2(3) |
| B(11)-B(5)-B(6)-I(5)  | 116.6(3)  |
| B(10)-B(5)-B(6)-I(5)  | 155.0(3)  |
| B(4)-B(5)-B(6)-I(5)   | -142.0(3) |
| I(4)-B(5)-B(6)-I(5)   | 3.3(4)    |
| C(1)-B(2)-B(7)-B(6)   | 39.1(3)   |
| B(8)-B(2)-B(7)-B(6)   | 137.6(3)  |
| B(3)-B(2)-B(7)-B(6)   | 100.1(3)  |
| I(1)-B(2)-B(7)-B(6)   | -108.8(3) |
| C(1)-B(2)-B(7)-B(11)  | 2.4(4)    |
| B(8)-B(2)-B(7)-B(11)  | 100.9(3)  |
| B(6)-B(2)-B(7)-B(11)  | -36.7(3)  |
| B(3)-B(2)-B(7)-B(11)  | 63.4(4)   |
| I(1)-B(2)-B(7)-B(11)  | -145.5(3) |

|                       |           |
|-----------------------|-----------|
| C(1)-B(2)-B(7)-B(8)   | -98.5(3)  |
| B(6)-B(2)-B(7)-B(8)   | -137.6(3) |
| B(3)-B(2)-B(7)-B(8)   | -37.4(3)  |
| I(1)-B(2)-B(7)-B(8)   | 113.6(3)  |
| C(1)-B(2)-B(7)-B(12)  | -61.4(4)  |
| B(8)-B(2)-B(7)-B(12)  | 37.1(3)   |
| B(6)-B(2)-B(7)-B(12)  | -100.5(4) |
| B(3)-B(2)-B(7)-B(12)  | -0.4(4)   |
| I(1)-B(2)-B(7)-B(12)  | 150.7(3)  |
| C(1)-B(2)-B(7)-I(6)   | 150.1(3)  |
| B(8)-B(2)-B(7)-I(6)   | -111.4(3) |
| B(6)-B(2)-B(7)-I(6)   | 111.0(3)  |
| B(3)-B(2)-B(7)-I(6)   | -148.9(3) |
| I(1)-B(2)-B(7)-I(6)   | 2.2(5)    |
| C(1)-B(6)-B(7)-B(2)   | -40.0(3)  |
| B(11)-B(6)-B(7)-B(2)  | -139.1(3) |
| B(5)-B(6)-B(7)-B(2)   | -102.1(3) |
| I(5)-B(6)-B(7)-B(2)   | 106.3(4)  |
| C(1)-B(6)-B(7)-B(11)  | 99.1(3)   |
| B(2)-B(6)-B(7)-B(11)  | 139.1(3)  |
| B(5)-B(6)-B(7)-B(11)  | 37.0(3)   |
| I(5)-B(6)-B(7)-B(11)  | -114.7(4) |
| C(1)-B(6)-B(7)-B(8)   | -2.1(4)   |
| B(11)-B(6)-B(7)-B(8)  | -101.2(3) |
| B(2)-B(6)-B(7)-B(8)   | 37.9(3)   |
| B(5)-B(6)-B(7)-B(8)   | -64.2(4)  |
| I(5)-B(6)-B(7)-B(8)   | 144.1(3)  |
| C(1)-B(6)-B(7)-B(12)  | 61.4(4)   |
| B(11)-B(6)-B(7)-B(12) | -37.7(3)  |
| B(2)-B(6)-B(7)-B(12)  | 101.4(3)  |
| B(5)-B(6)-B(7)-B(12)  | -0.7(4)   |
| I(5)-B(6)-B(7)-B(12)  | -152.3(3) |
| C(1)-B(6)-B(7)-I(6)   | -148.9(3) |
| B(11)-B(6)-B(7)-I(6)  | 112.1(3)  |
| B(2)-B(6)-B(7)-I(6)   | -108.9(3) |
| B(5)-B(6)-B(7)-I(6)   | 149.1(3)  |

|                      |           |
|----------------------|-----------|
| I(5)-B(6)-B(7)-I(6)  | -2.6(5)   |
| C(1)-B(3)-B(8)-B(2)  | 39.7(3)   |
| B(9)-B(3)-B(8)-B(2)  | 138.2(3)  |
| B(4)-B(3)-B(8)-B(2)  | 101.1(3)  |
| I(2)-B(3)-B(8)-B(2)  | -106.9(3) |
| C(1)-B(3)-B(8)-B(9)  | -98.5(3)  |
| B(2)-B(3)-B(8)-B(9)  | -138.2(3) |
| B(4)-B(3)-B(8)-B(9)  | -37.0(3)  |
| I(2)-B(3)-B(8)-B(9)  | 114.9(3)  |
| C(1)-B(3)-B(8)-B(7)  | 2.3(4)    |
| B(9)-B(3)-B(8)-B(7)  | 100.8(3)  |
| B(2)-B(3)-B(8)-B(7)  | -37.3(3)  |
| B(4)-B(3)-B(8)-B(7)  | 63.8(4)   |
| I(2)-B(3)-B(8)-B(7)  | -144.3(3) |
| C(1)-B(3)-B(8)-B(12) | -61.3(4)  |
| B(9)-B(3)-B(8)-B(12) | 37.2(3)   |
| B(2)-B(3)-B(8)-B(12) | -100.9(3) |
| B(4)-B(3)-B(8)-B(12) | 0.2(4)    |
| I(2)-B(3)-B(8)-B(12) | 152.2(3)  |
| C(1)-B(3)-B(8)-I(7)  | 150.2(3)  |
| B(9)-B(3)-B(8)-I(7)  | -111.3(3) |
| B(2)-B(3)-B(8)-I(7)  | 110.6(3)  |
| B(4)-B(3)-B(8)-I(7)  | -148.3(3) |
| I(2)-B(3)-B(8)-I(7)  | 3.7(5)    |
| C(1)-B(2)-B(8)-B(3)  | -39.5(3)  |
| B(7)-B(2)-B(8)-B(3)  | -137.9(3) |
| B(6)-B(2)-B(8)-B(3)  | -99.9(3)  |
| I(1)-B(2)-B(8)-B(3)  | 109.2(3)  |
| C(1)-B(2)-B(8)-B(9)  | -1.9(4)   |
| B(7)-B(2)-B(8)-B(9)  | -100.4(3) |
| B(6)-B(2)-B(8)-B(9)  | -62.4(4)  |
| B(3)-B(2)-B(8)-B(9)  | 37.5(3)   |
| I(1)-B(2)-B(8)-B(9)  | 146.8(3)  |
| C(1)-B(2)-B(8)-B(7)  | 98.5(3)   |
| B(6)-B(2)-B(8)-B(7)  | 38.0(3)   |
| B(3)-B(2)-B(8)-B(7)  | 137.9(3)  |

|                       |           |
|-----------------------|-----------|
| I(1)-B(2)-B(8)-B(7)   | -112.8(3) |
| C(1)-B(2)-B(8)-B(12)  | 61.5(4)   |
| B(7)-B(2)-B(8)-B(12)  | -37.0(3)  |
| B(6)-B(2)-B(8)-B(12)  | 1.0(4)    |
| B(3)-B(2)-B(8)-B(12)  | 101.0(3)  |
| I(1)-B(2)-B(8)-B(12)  | -149.8(3) |
| C(1)-B(2)-B(8)-I(7)   | -150.0(3) |
| B(7)-B(2)-B(8)-I(7)   | 111.6(3)  |
| B(6)-B(2)-B(8)-I(7)   | 149.6(3)  |
| B(3)-B(2)-B(8)-I(7)   | -110.5(3) |
| I(1)-B(2)-B(8)-I(7)   | -1.3(5)   |
| B(2)-B(7)-B(8)-B(3)   | 37.8(3)   |
| B(6)-B(7)-B(8)-B(3)   | -0.1(4)   |
| B(11)-B(7)-B(8)-B(3)  | -63.5(4)  |
| B(12)-B(7)-B(8)-B(3)  | -100.9(3) |
| I(6)-B(7)-B(8)-B(3)   | 146.4(3)  |
| B(6)-B(7)-B(8)-B(2)   | -37.9(3)  |
| B(11)-B(7)-B(8)-B(2)  | -101.3(4) |
| B(12)-B(7)-B(8)-B(2)  | -138.7(3) |
| I(6)-B(7)-B(8)-B(2)   | 108.6(3)  |
| B(2)-B(7)-B(8)-B(9)   | 101.2(3)  |
| B(6)-B(7)-B(8)-B(9)   | 63.3(4)   |
| B(11)-B(7)-B(8)-B(9)  | 0.0(4)    |
| B(12)-B(7)-B(8)-B(9)  | -37.5(3)  |
| I(6)-B(7)-B(8)-B(9)   | -150.1(3) |
| B(2)-B(7)-B(8)-B(12)  | 138.7(3)  |
| B(6)-B(7)-B(8)-B(12)  | 100.8(3)  |
| B(11)-B(7)-B(8)-B(12) | 37.5(3)   |
| I(6)-B(7)-B(8)-B(12)  | -112.6(3) |
| B(2)-B(7)-B(8)-I(7)   | -109.7(3) |
| B(6)-B(7)-B(8)-I(7)   | -147.6(3) |
| B(11)-B(7)-B(8)-I(7)  | 149.1(3)  |
| B(12)-B(7)-B(8)-I(7)  | 111.6(3)  |
| I(6)-B(7)-B(8)-I(7)   | -1.0(5)   |
| C(1)-B(4)-B(9)-B(10)  | -98.4(3)  |
| B(3)-B(4)-B(9)-B(10)  | -137.8(3) |

|                       |           |
|-----------------------|-----------|
| B(5)-B(4)-B(9)-B(10)  | -37.3(3)  |
| I(3)-B(4)-B(9)-B(10)  | 115.7(4)  |
| C(1)-B(4)-B(9)-B(3)   | 39.5(3)   |
| B(10)-B(4)-B(9)-B(3)  | 137.8(3)  |
| B(5)-B(4)-B(9)-B(3)   | 100.6(3)  |
| I(3)-B(4)-B(9)-B(3)   | -106.5(3) |
| C(1)-B(4)-B(9)-B(8)   | 2.3(4)    |
| B(10)-B(4)-B(9)-B(8)  | 100.7(3)  |
| B(3)-B(4)-B(9)-B(8)   | -37.2(3)  |
| B(5)-B(4)-B(9)-B(8)   | 63.4(4)   |
| I(3)-B(4)-B(9)-B(8)   | -143.6(3) |
| C(1)-B(4)-B(9)-B(12)  | -61.5(4)  |
| B(10)-B(4)-B(9)-B(12) | 36.9(3)   |
| B(3)-B(4)-B(9)-B(12)  | -101.0(3) |
| B(5)-B(4)-B(9)-B(12)  | -0.4(4)   |
| I(3)-B(4)-B(9)-B(12)  | 152.5(3)  |
| C(1)-B(4)-B(9)-I(8)   | 148.4(3)  |
| B(10)-B(4)-B(9)-I(8)  | -113.2(3) |
| B(3)-B(4)-B(9)-I(8)   | 109.0(3)  |
| B(5)-B(4)-B(9)-I(8)   | -150.5(3) |
| I(3)-B(4)-B(9)-I(8)   | 2.5(5)    |
| C(1)-B(3)-B(9)-B(10)  | -1.8(4)   |
| B(8)-B(3)-B(9)-B(10)  | -100.5(3) |
| B(2)-B(3)-B(9)-B(10)  | -63.2(4)  |
| B(4)-B(3)-B(9)-B(10)  | 37.9(3)   |
| I(2)-B(3)-B(9)-B(10)  | 145.7(3)  |
| C(1)-B(3)-B(9)-B(4)   | -39.7(3)  |
| B(8)-B(3)-B(9)-B(4)   | -138.4(3) |
| B(2)-B(3)-B(9)-B(4)   | -101.1(3) |
| I(2)-B(3)-B(9)-B(4)   | 107.8(4)  |
| C(1)-B(3)-B(9)-B(8)   | 98.7(3)   |
| B(2)-B(3)-B(9)-B(8)   | 37.3(3)   |
| B(4)-B(3)-B(9)-B(8)   | 138.4(3)  |
| I(2)-B(3)-B(9)-B(8)   | -113.8(4) |
| C(1)-B(3)-B(9)-B(12)  | 61.3(4)   |
| B(8)-B(3)-B(9)-B(12)  | -37.4(3)  |

|                       |           |
|-----------------------|-----------|
| B(2)-B(3)-B(9)-B(12)  | -0.1(4)   |
| B(4)-B(3)-B(9)-B(12)  | 101.0(3)  |
| I(2)-B(3)-B(9)-B(12)  | -151.2(3) |
| C(1)-B(3)-B(9)-I(8)   | -150.0(3) |
| B(8)-B(3)-B(9)-I(8)   | 111.4(3)  |
| B(2)-B(3)-B(9)-I(8)   | 148.7(3)  |
| B(4)-B(3)-B(9)-I(8)   | -110.2(3) |
| I(2)-B(3)-B(9)-I(8)   | -2.4(5)   |
| B(3)-B(8)-B(9)-B(10)  | 101.3(3)  |
| B(2)-B(8)-B(9)-B(10)  | 63.5(4)   |
| B(7)-B(8)-B(9)-B(10)  | 0.5(4)    |
| B(12)-B(8)-B(9)-B(10) | -37.1(3)  |
| I(7)-B(8)-B(9)-B(10)  | -148.7(3) |
| B(3)-B(8)-B(9)-B(4)   | 37.5(3)   |
| B(2)-B(8)-B(9)-B(4)   | -0.2(4)   |
| B(7)-B(8)-B(9)-B(4)   | -63.2(4)  |
| B(12)-B(8)-B(9)-B(4)  | -100.8(3) |
| I(7)-B(8)-B(9)-B(4)   | 147.5(3)  |
| B(2)-B(8)-B(9)-B(3)   | -37.8(3)  |
| B(7)-B(8)-B(9)-B(3)   | -100.7(3) |
| B(12)-B(8)-B(9)-B(3)  | -138.3(3) |
| I(7)-B(8)-B(9)-B(3)   | 110.0(3)  |
| B(3)-B(8)-B(9)-B(12)  | 138.3(3)  |
| B(2)-B(8)-B(9)-B(12)  | 100.6(3)  |
| B(7)-B(8)-B(9)-B(12)  | 37.6(3)   |
| I(7)-B(8)-B(9)-B(12)  | -111.7(3) |
| B(3)-B(8)-B(9)-I(8)   | -108.1(3) |
| B(2)-B(8)-B(9)-I(8)   | -145.9(3) |
| B(7)-B(8)-B(9)-I(8)   | 151.1(3)  |
| B(12)-B(8)-B(9)-I(8)  | 113.5(3)  |
| I(7)-B(8)-B(9)-I(8)   | 1.9(5)    |
| B(4)-B(9)-B(10)-B(12) | 138.6(3)  |
| B(3)-B(9)-B(10)-B(12) | 100.6(3)  |
| B(8)-B(9)-B(10)-B(12) | 37.3(3)   |
| I(8)-B(9)-B(10)-B(12) | -112.7(4) |
| B(3)-B(9)-B(10)-B(4)  | -38.0(3)  |

|                        |           |
|------------------------|-----------|
| B(8)-B(9)-B(10)-B(4)   | -101.3(3) |
| B(12)-B(9)-B(10)-B(4)  | -138.6(3) |
| I(8)-B(9)-B(10)-B(4)   | 108.7(4)  |
| B(4)-B(9)-B(10)-B(5)   | 37.6(3)   |
| B(3)-B(9)-B(10)-B(5)   | -0.4(4)   |
| B(8)-B(9)-B(10)-B(5)   | -63.6(4)  |
| B(12)-B(9)-B(10)-B(5)  | -101.0(3) |
| I(8)-B(9)-B(10)-B(5)   | 146.3(3)  |
| B(4)-B(9)-B(10)-B(11)  | 100.4(3)  |
| B(3)-B(9)-B(10)-B(11)  | 62.4(4)   |
| B(8)-B(9)-B(10)-B(11)  | -0.8(4)   |
| B(12)-B(9)-B(10)-B(11) | -38.2(3)  |
| I(8)-B(9)-B(10)-B(11)  | -150.9(3) |
| B(4)-B(9)-B(10)-I(9)   | -109.5(4) |
| B(3)-B(9)-B(10)-I(9)   | -147.5(3) |
| B(8)-B(9)-B(10)-I(9)   | 149.3(3)  |
| B(12)-B(9)-B(10)-I(9)  | 111.9(4)  |
| I(8)-B(9)-B(10)-I(9)   | -0.8(5)   |
| C(1)-B(4)-B(10)-B(12)  | 60.9(4)   |
| B(9)-B(4)-B(10)-B(12)  | -37.4(3)  |
| B(3)-B(4)-B(10)-B(12)  | 0.1(4)    |
| B(5)-B(4)-B(10)-B(12)  | 100.8(3)  |
| I(3)-B(4)-B(10)-B(12)  | -151.8(3) |
| C(1)-B(4)-B(10)-B(9)   | 98.3(3)   |
| B(3)-B(4)-B(10)-B(9)   | 37.5(3)   |
| B(5)-B(4)-B(10)-B(9)   | 138.1(3)  |
| I(3)-B(4)-B(10)-B(9)   | -114.4(4) |
| C(1)-B(4)-B(10)-B(5)   | -39.9(3)  |
| B(9)-B(4)-B(10)-B(5)   | -138.1(3) |
| B(3)-B(4)-B(10)-B(5)   | -100.7(3) |
| I(3)-B(4)-B(10)-B(5)   | 107.5(4)  |
| C(1)-B(4)-B(10)-B(11)  | -2.9(4)   |
| B(9)-B(4)-B(10)-B(11)  | -101.2(3) |
| B(3)-B(4)-B(10)-B(11)  | -63.7(4)  |
| B(5)-B(4)-B(10)-B(11)  | 37.0(3)   |
| I(3)-B(4)-B(10)-B(11)  | 144.5(3)  |

|                        |           |
|------------------------|-----------|
| C(1)-B(4)-B(10)-I(9)   | -149.4(3) |
| B(9)-B(4)-B(10)-I(9)   | 112.3(3)  |
| B(3)-B(4)-B(10)-I(9)   | 149.8(3)  |
| B(5)-B(4)-B(10)-I(9)   | -109.5(3) |
| I(3)-B(4)-B(10)-I(9)   | -2.1(5)   |
| C(1)-B(5)-B(10)-B(12)  | -61.6(4)  |
| B(11)-B(5)-B(10)-B(12) | 36.7(3)   |
| B(6)-B(5)-B(10)-B(12)  | -1.4(4)   |
| B(4)-B(5)-B(10)-B(12)  | -101.5(3) |
| I(4)-B(5)-B(10)-B(12)  | 149.4(3)  |
| C(1)-B(5)-B(10)-B(9)   | 2.5(4)    |
| B(11)-B(5)-B(10)-B(9)  | 100.8(3)  |
| B(6)-B(5)-B(10)-B(9)   | 62.7(4)   |
| B(4)-B(5)-B(10)-B(9)   | -37.4(3)  |
| I(4)-B(5)-B(10)-B(9)   | -146.6(3) |
| C(1)-B(5)-B(10)-B(4)   | 39.9(3)   |
| B(11)-B(5)-B(10)-B(4)  | 138.2(3)  |
| B(6)-B(5)-B(10)-B(4)   | 100.1(3)  |
| I(4)-B(5)-B(10)-B(4)   | -109.1(4) |
| C(1)-B(5)-B(10)-B(11)  | -98.3(3)  |
| B(6)-B(5)-B(10)-B(11)  | -38.1(3)  |
| B(4)-B(5)-B(10)-B(11)  | -138.2(3) |
| I(4)-B(5)-B(10)-B(11)  | 112.7(3)  |
| C(1)-B(5)-B(10)-I(9)   | 150.5(3)  |
| B(11)-B(5)-B(10)-I(9)  | -111.2(3) |
| B(6)-B(5)-B(10)-I(9)   | -149.2(3) |
| B(4)-B(5)-B(10)-I(9)   | 110.6(3)  |
| I(4)-B(5)-B(10)-I(9)   | 1.5(5)    |
| C(1)-B(5)-B(11)-B(6)   | -38.7(3)  |
| B(10)-B(5)-B(11)-B(6)  | -137.2(3) |
| B(4)-B(5)-B(11)-B(6)   | -99.9(3)  |
| I(4)-B(5)-B(11)-B(6)   | 109.5(3)  |
| C(1)-B(5)-B(11)-B(7)   | -1.5(4)   |
| B(6)-B(5)-B(11)-B(7)   | 37.2(3)   |
| B(10)-B(5)-B(11)-B(7)  | -100.0(3) |
| B(4)-B(5)-B(11)-B(7)   | -62.7(4)  |



|                        |           |
|------------------------|-----------|
| I(4)-B(5)-B(11)-B(7)   | 146.8(3)  |
| C(1)-B(5)-B(11)-B(12)  | 62.4(4)   |
| B(6)-B(5)-B(11)-B(12)  | 101.1(3)  |
| B(10)-B(5)-B(11)-B(12) | -36.2(3)  |
| B(4)-B(5)-B(11)-B(12)  | 1.1(4)    |
| I(4)-B(5)-B(11)-B(12)  | -149.4(3) |
| C(1)-B(5)-B(11)-B(10)  | 98.6(3)   |
| B(6)-B(5)-B(11)-B(10)  | 137.2(3)  |
| B(4)-B(5)-B(11)-B(10)  | 37.3(3)   |
| I(4)-B(5)-B(11)-B(10)  | -113.2(3) |
| C(1)-B(5)-B(11)-I(10)  | -147.0(3) |
| B(6)-B(5)-B(11)-I(10)  | -108.3(3) |
| B(10)-B(5)-B(11)-I(10) | 114.4(3)  |
| B(4)-B(5)-B(11)-I(10)  | 151.8(3)  |
| I(4)-B(5)-B(11)-I(10)  | 1.2(5)    |
| C(1)-B(6)-B(11)-B(5)   | 39.7(3)   |
| B(7)-B(6)-B(11)-B(5)   | 138.5(3)  |
| B(2)-B(6)-B(11)-B(5)   | 102.0(3)  |
| I(5)-B(6)-B(11)-B(5)   | -106.6(4) |
| C(1)-B(6)-B(11)-B(7)   | -98.8(3)  |
| B(2)-B(6)-B(11)-B(7)   | -36.6(3)  |
| B(5)-B(6)-B(11)-B(7)   | -138.5(3) |
| I(5)-B(6)-B(11)-B(7)   | 114.9(4)  |
| C(1)-B(6)-B(11)-B(12)  | -61.0(4)  |
| B(7)-B(6)-B(11)-B(12)  | 37.8(3)   |
| B(2)-B(6)-B(11)-B(12)  | 1.3(4)    |
| B(5)-B(6)-B(11)-B(12)  | -100.7(3) |
| I(5)-B(6)-B(11)-B(12)  | 152.7(3)  |
| C(1)-B(6)-B(11)-B(10)  | 1.6(4)    |
| B(7)-B(6)-B(11)-B(10)  | 100.4(3)  |
| B(2)-B(6)-B(11)-B(10)  | 63.8(4)   |
| B(5)-B(6)-B(11)-B(10)  | -38.2(3)  |
| I(5)-B(6)-B(11)-B(10)  | -144.8(3) |
| C(1)-B(6)-B(11)-I(10)  | 149.3(3)  |
| B(7)-B(6)-B(11)-I(10)  | -111.9(3) |
| B(2)-B(6)-B(11)-I(10)  | -148.4(3) |

|                        |           |
|------------------------|-----------|
| B(5)-B(6)-B(11)-I(10)  | 109.6(3)  |
| I(5)-B(6)-B(11)-I(10)  | 3.0(5)    |
| B(2)-B(7)-B(11)-B(5)   | -0.6(4)   |
| B(6)-B(7)-B(11)-B(5)   | -37.4(3)  |
| B(8)-B(7)-B(11)-B(5)   | 63.0(4)   |
| B(12)-B(7)-B(11)-B(5)  | 100.5(3)  |
| I(6)-B(7)-B(11)-B(5)   | -147.2(3) |
| B(2)-B(7)-B(11)-B(6)   | 36.8(3)   |
| B(8)-B(7)-B(11)-B(6)   | 100.4(3)  |
| B(12)-B(7)-B(11)-B(6)  | 137.9(3)  |
| I(6)-B(7)-B(11)-B(6)   | -109.8(3) |
| B(2)-B(7)-B(11)-B(12)  | -101.0(3) |
| B(6)-B(7)-B(11)-B(12)  | -137.9(3) |
| B(8)-B(7)-B(11)-B(12)  | -37.5(3)  |
| I(6)-B(7)-B(11)-B(12)  | 112.3(3)  |
| B(2)-B(7)-B(11)-B(10)  | -64.0(4)  |
| B(6)-B(7)-B(11)-B(10)  | -100.9(3) |
| B(8)-B(7)-B(11)-B(10)  | -0.5(4)   |
| B(12)-B(7)-B(11)-B(10) | 37.0(3)   |
| I(6)-B(7)-B(11)-B(10)  | 149.3(3)  |
| B(2)-B(7)-B(11)-I(10)  | 144.1(3)  |
| B(6)-B(7)-B(11)-I(10)  | 107.3(3)  |
| B(8)-B(7)-B(11)-I(10)  | -152.3(3) |
| B(12)-B(7)-B(11)-I(10) | -114.8(4) |
| I(6)-B(7)-B(11)-I(10)  | -2.5(5)   |
| B(12)-B(10)-B(11)-B(5) | -139.1(3) |
| B(9)-B(10)-B(11)-B(5)  | -100.8(3) |
| B(4)-B(10)-B(11)-B(5)  | -37.5(3)  |
| I(9)-B(10)-B(11)-B(5)  | 108.8(3)  |
| B(12)-B(10)-B(11)-B(6) | -100.8(3) |
| B(9)-B(10)-B(11)-B(6)  | -62.5(4)  |
| B(4)-B(10)-B(11)-B(6)  | 0.9(4)    |
| B(5)-B(10)-B(11)-B(6)  | 38.3(3)   |
| I(9)-B(10)-B(11)-B(6)  | 147.1(3)  |
| B(12)-B(10)-B(11)-B(7) | -37.5(3)  |
| B(9)-B(10)-B(11)-B(7)  | 0.8(4)    |

|                         |           |
|-------------------------|-----------|
| B(4)-B(10)-B(11)-B(7)   | 64.2(4)   |
| B(5)-B(10)-B(11)-B(7)   | 101.6(3)  |
| I(9)-B(10)-B(11)-B(7)   | -149.6(3) |
| B(9)-B(10)-B(11)-B(12)  | 38.3(3)   |
| B(4)-B(10)-B(11)-B(12)  | 101.7(3)  |
| B(5)-B(10)-B(11)-B(12)  | 139.1(3)  |
| I(9)-B(10)-B(11)-B(12)  | -112.1(3) |
| B(12)-B(10)-B(11)-I(10) | 113.5(4)  |
| B(9)-B(10)-B(11)-I(10)  | 151.8(3)  |
| B(4)-B(10)-B(11)-I(10)  | -144.9(3) |
| B(5)-B(10)-B(11)-I(10)  | -107.4(4) |
| I(9)-B(10)-B(11)-I(10)  | 1.4(5)    |
| B(4)-B(10)-B(12)-B(9)   | 37.1(3)   |
| B(5)-B(10)-B(12)-B(9)   | 101.1(3)  |
| B(11)-B(10)-B(12)-B(9)  | 137.4(3)  |
| I(9)-B(10)-B(12)-B(9)   | -111.9(3) |
| B(9)-B(10)-B(12)-B(11)  | -137.4(3) |
| B(4)-B(10)-B(12)-B(11)  | -100.3(3) |
| B(5)-B(10)-B(12)-B(11)  | -36.3(3)  |
| I(9)-B(10)-B(12)-B(11)  | 110.6(3)  |
| B(9)-B(10)-B(12)-B(7)   | -100.2(3) |
| B(4)-B(10)-B(12)-B(7)   | -63.0(4)  |
| B(5)-B(10)-B(12)-B(7)   | 0.9(4)    |
| B(11)-B(10)-B(12)-B(7)  | 37.3(3)   |
| I(9)-B(10)-B(12)-B(7)   | 147.9(3)  |
| B(9)-B(10)-B(12)-B(8)   | -37.1(3)  |
| B(4)-B(10)-B(12)-B(8)   | 0.0(4)    |
| B(5)-B(10)-B(12)-B(8)   | 64.0(4)   |
| B(11)-B(10)-B(12)-B(8)  | 100.4(3)  |
| I(9)-B(10)-B(12)-B(8)   | -149.0(3) |
| B(9)-B(10)-B(12)-I(11)  | 112.0(3)  |
| B(4)-B(10)-B(12)-I(11)  | 149.2(3)  |
| B(5)-B(10)-B(12)-I(11)  | -146.9(3) |
| B(11)-B(10)-B(12)-I(11) | -110.5(3) |
| I(9)-B(10)-B(12)-I(11)  | 0.1(5)    |
| B(4)-B(9)-B(12)-B(10)   | -37.1(3)  |

|                         |           |
|-------------------------|-----------|
| B(3)-B(9)-B(12)-B(10)   | -101.2(3) |
| B(8)-B(9)-B(12)-B(10)   | -138.4(3) |
| I(8)-B(9)-B(12)-B(10)   | 111.7(3)  |
| B(10)-B(9)-B(12)-B(11)  | 38.3(3)   |
| B(4)-B(9)-B(12)-B(11)   | 1.1(4)    |
| B(3)-B(9)-B(12)-B(11)   | -63.0(4)  |
| B(8)-B(9)-B(12)-B(11)   | -100.1(3) |
| I(8)-B(9)-B(12)-B(11)   | 149.9(3)  |
| B(10)-B(9)-B(12)-B(7)   | 101.1(3)  |
| B(4)-B(9)-B(12)-B(7)    | 63.9(4)   |
| B(3)-B(9)-B(12)-B(7)    | -0.2(4)   |
| B(8)-B(9)-B(12)-B(7)    | -37.3(3)  |
| I(8)-B(9)-B(12)-B(7)    | -147.3(3) |
| B(10)-B(9)-B(12)-B(8)   | 138.4(3)  |
| B(4)-B(9)-B(12)-B(8)    | 101.2(3)  |
| B(3)-B(9)-B(12)-B(8)    | 37.1(3)   |
| I(8)-B(9)-B(12)-B(8)    | -110.0(4) |
| B(10)-B(9)-B(12)-I(11)  | -110.5(3) |
| B(4)-B(9)-B(12)-I(11)   | -147.6(3) |
| B(3)-B(9)-B(12)-I(11)   | 148.3(3)  |
| B(8)-B(9)-B(12)-I(11)   | 111.2(4)  |
| I(8)-B(9)-B(12)-I(11)   | 1.2(5)    |
| B(5)-B(11)-B(12)-B(10)  | 36.6(3)   |
| B(6)-B(11)-B(12)-B(10)  | 100.4(3)  |
| B(7)-B(11)-B(12)-B(10)  | 138.1(3)  |
| I(10)-B(11)-B(12)-B(10) | -112.2(4) |
| B(5)-B(11)-B(12)-B(9)   | -1.4(4)   |
| B(6)-B(11)-B(12)-B(9)   | 62.5(4)   |
| B(7)-B(11)-B(12)-B(9)   | 100.1(3)  |
| B(10)-B(11)-B(12)-B(9)  | -37.9(3)  |
| I(10)-B(11)-B(12)-B(9)  | -150.1(3) |
| B(5)-B(11)-B(12)-B(7)   | -101.5(3) |
| B(6)-B(11)-B(12)-B(7)   | -37.7(3)  |
| B(10)-B(11)-B(12)-B(7)  | -138.1(3) |
| I(10)-B(11)-B(12)-B(7)  | 109.7(4)  |
| B(5)-B(11)-B(12)-B(8)   | -64.5(4)  |

|                         |           |
|-------------------------|-----------|
| B(6)-B(11)-B(12)-B(8)   | -0.6(4)   |
| B(7)-B(11)-B(12)-B(8)   | 37.1(3)   |
| B(10)-B(11)-B(12)-B(8)  | -101.0(3) |
| I(10)-B(11)-B(12)-B(8)  | 146.8(3)  |
| B(5)-B(11)-B(12)-I(11)  | 147.9(3)  |
| B(6)-B(11)-B(12)-I(11)  | -148.3(3) |
| B(7)-B(11)-B(12)-I(11)  | -110.6(3) |
| B(10)-B(11)-B(12)-I(11) | 111.3(3)  |
| I(10)-B(11)-B(12)-I(11) | -0.9(5)   |
| B(2)-B(7)-B(12)-B(10)   | 63.5(4)   |
| B(6)-B(7)-B(12)-B(10)   | -0.2(4)   |
| B(11)-B(7)-B(12)-B(10)  | -37.7(3)  |
| B(8)-B(7)-B(12)-B(10)   | 100.5(3)  |
| I(6)-B(7)-B(12)-B(10)   | -149.2(3) |
| B(2)-B(7)-B(12)-B(9)    | 0.3(4)    |
| B(6)-B(7)-B(12)-B(9)    | -63.3(4)  |
| B(11)-B(7)-B(12)-B(9)   | -100.9(4) |
| B(8)-B(7)-B(12)-B(9)    | 37.3(3)   |
| I(6)-B(7)-B(12)-B(9)    | 147.6(3)  |
| B(2)-B(7)-B(12)-B(11)   | 101.3(4)  |
| B(6)-B(7)-B(12)-B(11)   | 37.6(3)   |
| B(8)-B(7)-B(12)-B(11)   | 138.3(3)  |
| I(6)-B(7)-B(12)-B(11)   | -111.5(3) |
| B(2)-B(7)-B(12)-B(8)    | -37.0(3)  |
| B(6)-B(7)-B(12)-B(8)    | -100.7(3) |
| B(11)-B(7)-B(12)-B(8)   | -138.3(3) |
| I(6)-B(7)-B(12)-B(8)    | 110.3(4)  |
| B(2)-B(7)-B(12)-I(11)   | -148.6(3) |
| B(6)-B(7)-B(12)-I(11)   | 147.7(3)  |
| B(11)-B(7)-B(12)-I(11)  | 110.2(3)  |
| B(8)-B(7)-B(12)-I(11)   | -111.6(3) |
| I(6)-B(7)-B(12)-I(11)   | -1.3(5)   |
| B(3)-B(8)-B(12)-B(10)   | -0.1(4)   |
| B(2)-B(8)-B(12)-B(10)   | -64.2(4)  |
| B(9)-B(8)-B(12)-B(10)   | 37.1(3)   |
| B(7)-B(8)-B(12)-B(10)   | -100.9(3) |

|                        |           |
|------------------------|-----------|
| I(7)-B(8)-B(12)-B(10)  | 147.8(3)  |
| B(3)-B(8)-B(12)-B(9)   | -37.3(3)  |
| B(2)-B(8)-B(12)-B(9)   | -101.3(3) |
| B(7)-B(8)-B(12)-B(9)   | -138.0(3) |
| I(7)-B(8)-B(12)-B(9)   | 110.7(3)  |
| B(3)-B(8)-B(12)-B(11)  | 63.8(4)   |
| B(2)-B(8)-B(12)-B(11)  | -0.3(4)   |
| B(9)-B(8)-B(12)-B(11)  | 101.0(4)  |
| B(7)-B(8)-B(12)-B(11)  | -37.0(3)  |
| I(7)-B(8)-B(12)-B(11)  | -148.3(3) |
| B(3)-B(8)-B(12)-B(7)   | 100.7(3)  |
| B(2)-B(8)-B(12)-B(7)   | 36.7(3)   |
| B(9)-B(8)-B(12)-B(7)   | 138.0(3)  |
| I(7)-B(8)-B(12)-B(7)   | -111.3(4) |
| B(3)-B(8)-B(12)-I(11)  | -149.0(3) |
| B(2)-B(8)-B(12)-I(11)  | 146.9(3)  |
| B(9)-B(8)-B(12)-I(11)  | -111.8(3) |
| B(7)-B(8)-B(12)-I(11)  | 110.2(3)  |
| I(7)-B(8)-B(12)-I(11)  | -1.1(5)   |
| B(17)-C(2)-B(13)-B(18) | -39.6(3)  |
| B(15)-C(2)-B(13)-B(18) | 66.2(4)   |
| B(14)-C(2)-B(13)-B(18) | 102.9(3)  |
| B(16)-C(2)-B(13)-B(18) | -3.0(4)   |
| B(15)-C(2)-B(13)-B(17) | 105.8(4)  |
| B(14)-C(2)-B(13)-B(17) | 142.5(3)  |
| B(16)-C(2)-B(13)-B(17) | 36.6(3)   |
| B(17)-C(2)-B(13)-B(14) | -142.5(3) |
| B(15)-C(2)-B(13)-B(14) | -36.7(3)  |
| B(16)-C(2)-B(13)-B(14) | -105.8(3) |
| B(17)-C(2)-B(13)-B(19) | -102.6(3) |
| B(15)-C(2)-B(13)-B(19) | 3.2(4)    |
| B(14)-C(2)-B(13)-B(19) | 39.8(3)   |
| B(16)-C(2)-B(13)-B(19) | -66.0(4)  |
| B(17)-C(2)-B(13)-I(12) | 109.6(3)  |
| B(15)-C(2)-B(13)-I(12) | -144.6(3) |
| B(14)-C(2)-B(13)-I(12) | -107.9(3) |

|                         |           |
|-------------------------|-----------|
| B(16)-C(2)-B(13)-I(12)  | 146.3(3)  |
| B(17)-C(2)-B(14)-B(20)  | -66.1(4)  |
| B(15)-C(2)-B(14)-B(20)  | 39.7(3)   |
| B(13)-C(2)-B(14)-B(20)  | -102.6(4) |
| B(16)-C(2)-B(14)-B(20)  | 3.6(5)    |
| B(17)-C(2)-B(14)-B(19)  | -3.6(4)   |
| B(15)-C(2)-B(14)-B(19)  | 102.2(3)  |
| B(13)-C(2)-B(14)-B(19)  | -40.1(3)  |
| B(16)-C(2)-B(14)-B(19)  | 66.1(4)   |
| B(17)-C(2)-B(14)-B(13)  | 36.6(3)   |
| B(15)-C(2)-B(14)-B(13)  | 142.3(3)  |
| B(16)-C(2)-B(14)-B(13)  | 106.2(4)  |
| B(17)-C(2)-B(14)-B(15)  | -105.7(4) |
| B(13)-C(2)-B(14)-B(15)  | -142.3(3) |
| B(16)-C(2)-B(14)-B(15)  | -36.1(4)  |
| B(17)-C(2)-B(14)-I(13)  | 144.1(3)  |
| B(15)-C(2)-B(14)-I(13)  | -110.2(4) |
| B(13)-C(2)-B(14)-I(13)  | 107.5(4)  |
| B(16)-C(2)-B(14)-I(13)  | -146.3(3) |
| B(18)-B(13)-B(14)-C(2)  | -96.0(3)  |
| B(17)-B(13)-B(14)-C(2)  | -33.0(3)  |
| B(19)-B(13)-B(14)-C(2)  | -134.1(3) |
| I(12)-B(13)-B(14)-C(2)  | 111.5(3)  |
| C(2)-B(13)-B(14)-B(20)  | 96.4(3)   |
| B(18)-B(13)-B(14)-B(20) | 0.4(4)    |
| B(17)-B(13)-B(14)-B(20) | 63.4(4)   |
| B(19)-B(13)-B(14)-B(20) | -37.7(3)  |
| I(12)-B(13)-B(14)-B(20) | -152.1(3) |
| C(2)-B(13)-B(14)-B(19)  | 134.1(3)  |
| B(18)-B(13)-B(14)-B(19) | 38.1(3)   |
| B(17)-B(13)-B(14)-B(19) | 101.1(3)  |
| I(12)-B(13)-B(14)-B(19) | -114.4(3) |
| C(2)-B(13)-B(14)-B(15)  | 33.2(3)   |
| B(18)-B(13)-B(14)-B(15) | -62.8(4)  |
| B(17)-B(13)-B(14)-B(15) | 0.2(4)    |
| B(19)-B(13)-B(14)-B(15) | -100.9(3) |

|                         |           |
|-------------------------|-----------|
| I(12)-B(13)-B(14)-B(15) | 144.7(3)  |
| C(2)-B(13)-B(14)-I(13)  | -111.3(3) |
| B(18)-B(13)-B(14)-I(13) | 152.7(3)  |
| B(17)-B(13)-B(14)-I(13) | -144.3(3) |
| B(19)-B(13)-B(14)-I(13) | 114.6(3)  |
| I(12)-B(13)-B(14)-I(13) | 0.2(5)    |
| B(17)-C(2)-B(15)-B(16)  | -36.1(3)  |
| B(13)-C(2)-B(15)-B(16)  | -105.9(4) |
| B(14)-C(2)-B(15)-B(16)  | -142.6(4) |
| B(17)-C(2)-B(15)-B(20)  | 66.7(4)   |
| B(13)-C(2)-B(15)-B(20)  | -3.1(4)   |
| B(14)-C(2)-B(15)-B(20)  | -39.7(3)  |
| B(16)-C(2)-B(15)-B(20)  | 102.9(4)  |
| B(17)-C(2)-B(15)-B(21)  | 4.1(5)    |
| B(13)-C(2)-B(15)-B(21)  | -65.7(4)  |
| B(14)-C(2)-B(15)-B(21)  | -102.4(4) |
| B(16)-C(2)-B(15)-B(21)  | 40.2(3)   |
| B(17)-C(2)-B(15)-B(14)  | 106.4(4)  |
| B(13)-C(2)-B(15)-B(14)  | 36.6(3)   |
| B(16)-C(2)-B(15)-B(14)  | 142.6(4)  |
| B(17)-C(2)-B(15)-I(14)  | -146.1(3) |
| B(13)-C(2)-B(15)-I(14)  | 144.1(3)  |
| B(14)-C(2)-B(15)-I(14)  | 107.5(3)  |
| B(16)-C(2)-B(15)-I(14)  | -110.0(4) |
| B(20)-B(14)-B(15)-C(2)  | -134.3(4) |
| B(19)-B(14)-B(15)-C(2)  | -96.8(3)  |
| B(13)-B(14)-B(15)-C(2)  | -33.2(3)  |
| I(13)-B(14)-B(15)-C(2)  | 110.3(3)  |
| C(2)-B(14)-B(15)-B(16)  | 33.3(3)   |
| B(20)-B(14)-B(15)-B(16) | -101.0(4) |
| B(19)-B(14)-B(15)-B(16) | -63.5(4)  |
| B(13)-B(14)-B(15)-B(16) | 0.1(4)    |
| I(13)-B(14)-B(15)-B(16) | 143.6(3)  |
| C(2)-B(14)-B(15)-B(20)  | 134.3(4)  |
| B(19)-B(14)-B(15)-B(20) | 37.6(3)   |
| B(13)-B(14)-B(15)-B(20) | 101.1(4)  |



|                         |           |
|-------------------------|-----------|
| I(13)-B(14)-B(15)-B(20) | -115.3(4) |
| C(2)-B(14)-B(15)-B(21)  | 96.7(3)   |
| B(20)-B(14)-B(15)-B(21) | -37.6(3)  |
| B(19)-B(14)-B(15)-B(21) | -0.1(4)   |
| B(13)-B(14)-B(15)-B(21) | 63.5(4)   |
| I(13)-B(14)-B(15)-B(21) | -152.9(3) |
| C(2)-B(14)-B(15)-I(14)  | -110.5(3) |
| B(20)-B(14)-B(15)-I(14) | 115.1(3)  |
| B(19)-B(14)-B(15)-I(14) | 152.7(3)  |
| B(13)-B(14)-B(15)-I(14) | -143.7(3) |
| I(13)-B(14)-B(15)-I(14) | -0.2(4)   |
| B(17)-C(2)-B(16)-B(22)  | 39.8(3)   |
| B(15)-C(2)-B(16)-B(22)  | -102.9(4) |
| B(13)-C(2)-B(16)-B(22)  | 3.1(4)    |
| B(14)-C(2)-B(16)-B(22)  | -66.6(4)  |
| B(17)-C(2)-B(16)-B(15)  | 142.7(3)  |
| B(13)-C(2)-B(16)-B(15)  | 106.0(4)  |
| B(14)-C(2)-B(16)-B(15)  | 36.4(4)   |
| B(17)-C(2)-B(16)-B(21)  | 102.3(4)  |
| B(15)-C(2)-B(16)-B(21)  | -40.4(3)  |
| B(13)-C(2)-B(16)-B(21)  | 65.6(4)   |
| B(14)-C(2)-B(16)-B(21)  | -4.0(5)   |
| B(15)-C(2)-B(16)-B(17)  | -142.7(4) |
| B(13)-C(2)-B(16)-B(17)  | -36.7(3)  |
| B(14)-C(2)-B(16)-B(17)  | -106.3(4) |
| B(17)-C(2)-B(16)-I(15)  | -107.2(4) |
| B(15)-C(2)-B(16)-I(15)  | 110.1(4)  |
| B(13)-C(2)-B(16)-I(15)  | -143.9(3) |
| B(14)-C(2)-B(16)-I(15)  | 146.5(3)  |
| B(20)-B(15)-B(16)-C(2)  | -96.5(4)  |
| B(21)-B(15)-B(16)-C(2)  | -133.9(4) |
| B(14)-B(15)-B(16)-C(2)  | -33.2(3)  |
| I(14)-B(15)-B(16)-C(2)  | 109.9(4)  |
| C(2)-B(15)-B(16)-B(22)  | 96.2(4)   |
| B(20)-B(15)-B(16)-B(22) | -0.3(4)   |
| B(21)-B(15)-B(16)-B(22) | -37.7(3)  |

|                         |           |
|-------------------------|-----------|
| B(14)-B(15)-B(16)-B(22) | 63.0(4)   |
| I(14)-B(15)-B(16)-B(22) | -153.9(3) |
| C(2)-B(15)-B(16)-B(21)  | 133.9(4)  |
| B(20)-B(15)-B(16)-B(21) | 37.4(3)   |
| B(14)-B(15)-B(16)-B(21) | 100.7(4)  |
| I(14)-B(15)-B(16)-B(21) | -116.3(4) |
| C(2)-B(15)-B(16)-B(17)  | 32.8(3)   |
| B(20)-B(15)-B(16)-B(17) | -63.7(4)  |
| B(21)-B(15)-B(16)-B(17) | -101.1(4) |
| B(14)-B(15)-B(16)-B(17) | -0.4(4)   |
| I(14)-B(15)-B(16)-B(17) | 142.7(3)  |
| C(2)-B(15)-B(16)-I(15)  | -114.0(3) |
| B(20)-B(15)-B(16)-I(15) | 149.5(3)  |
| B(21)-B(15)-B(16)-I(15) | 112.1(4)  |
| B(14)-B(15)-B(16)-I(15) | -147.2(3) |
| I(14)-B(15)-B(16)-I(15) | -4.1(5)   |
| B(15)-C(2)-B(17)-B(18)  | -66.4(4)  |
| B(13)-C(2)-B(17)-B(18)  | 39.9(3)   |
| B(14)-C(2)-B(17)-B(18)  | 3.3(4)    |
| B(16)-C(2)-B(17)-B(18)  | -102.4(3) |
| B(15)-C(2)-B(17)-B(22)  | -3.8(5)   |
| B(13)-C(2)-B(17)-B(22)  | 102.5(3)  |
| B(14)-C(2)-B(17)-B(22)  | 66.0(4)   |
| B(16)-C(2)-B(17)-B(22)  | -39.8(3)  |
| B(15)-C(2)-B(17)-B(16)  | 36.0(3)   |
| B(13)-C(2)-B(17)-B(16)  | 142.3(3)  |
| B(14)-C(2)-B(17)-B(16)  | 105.8(3)  |
| B(15)-C(2)-B(17)-B(13)  | -106.3(4) |
| B(14)-C(2)-B(17)-B(13)  | -36.6(3)  |
| B(16)-C(2)-B(17)-B(13)  | -142.3(3) |
| B(15)-C(2)-B(17)-I(16)  | 145.1(3)  |
| B(13)-C(2)-B(17)-I(16)  | -108.6(3) |
| B(14)-C(2)-B(17)-I(16)  | -145.1(3) |
| B(16)-C(2)-B(17)-I(16)  | 109.1(3)  |
| B(22)-B(16)-B(17)-C(2)  | -134.3(3) |
| B(15)-B(16)-B(17)-C(2)  | -33.0(3)  |

|                         |           |
|-------------------------|-----------|
| B(21)-B(16)-B(17)-C(2)  | -96.7(3)  |
| I(15)-B(16)-B(17)-C(2)  | 114.6(3)  |
| C(2)-B(16)-B(17)-B(18)  | 97.0(3)   |
| B(22)-B(16)-B(17)-B(18) | -37.4(3)  |
| B(15)-B(16)-B(17)-B(18) | 64.0(4)   |
| B(21)-B(16)-B(17)-B(18) | 0.3(4)    |
| I(15)-B(16)-B(17)-B(18) | -148.4(3) |
| C(2)-B(16)-B(17)-B(22)  | 134.3(3)  |
| B(15)-B(16)-B(17)-B(22) | 101.3(3)  |
| B(21)-B(16)-B(17)-B(22) | 37.7(3)   |
| I(15)-B(16)-B(17)-B(22) | -111.0(3) |
| C(2)-B(16)-B(17)-B(13)  | 33.5(3)   |
| B(22)-B(16)-B(17)-B(13) | -100.9(3) |
| B(15)-B(16)-B(17)-B(13) | 0.5(4)    |
| B(21)-B(16)-B(17)-B(13) | -63.2(4)  |
| I(15)-B(16)-B(17)-B(13) | 148.1(3)  |
| C(2)-B(16)-B(17)-I(16)  | -109.5(3) |
| B(22)-B(16)-B(17)-I(16) | 116.2(3)  |
| B(15)-B(16)-B(17)-I(16) | -142.5(3) |
| B(21)-B(16)-B(17)-I(16) | 153.8(3)  |
| I(15)-B(16)-B(17)-I(16) | 5.1(4)    |
| B(18)-B(13)-B(17)-C(2)  | 134.3(3)  |
| B(14)-B(13)-B(17)-C(2)  | 33.1(3)   |
| B(19)-B(13)-B(17)-C(2)  | 96.2(4)   |
| I(12)-B(13)-B(17)-C(2)  | -110.7(3) |
| C(2)-B(13)-B(17)-B(18)  | -134.3(3) |
| B(14)-B(13)-B(17)-B(18) | -101.2(3) |
| B(19)-B(13)-B(17)-B(18) | -38.1(3)  |
| I(12)-B(13)-B(17)-B(18) | 115.0(4)  |
| C(2)-B(13)-B(17)-B(22)  | -96.9(4)  |
| B(18)-B(13)-B(17)-B(22) | 37.4(3)   |
| B(14)-B(13)-B(17)-B(22) | -63.7(4)  |
| B(19)-B(13)-B(17)-B(22) | -0.6(5)   |
| I(12)-B(13)-B(17)-B(22) | 152.4(3)  |
| C(2)-B(13)-B(17)-B(16)  | -33.6(3)  |
| B(18)-B(13)-B(17)-B(16) | 100.7(3)  |

|                         |           |
|-------------------------|-----------|
| B(14)-B(13)-B(17)-B(16) | -0.4(4)   |
| B(19)-B(13)-B(17)-B(16) | 62.7(4)   |
| I(12)-B(13)-B(17)-B(16) | -144.3(3) |
| C(2)-B(13)-B(17)-I(16)  | 109.6(3)  |
| B(18)-B(13)-B(17)-I(16) | -116.1(4) |
| B(14)-B(13)-B(17)-I(16) | 142.7(3)  |
| B(19)-B(13)-B(17)-I(16) | -154.2(3) |
| I(12)-B(13)-B(17)-I(16) | -1.1(5)   |
| C(2)-B(17)-B(18)-B(13)  | -39.4(3)  |
| B(22)-B(17)-B(18)-B(13) | -138.3(4) |
| B(16)-B(17)-B(18)-B(13) | -101.2(3) |
| I(16)-B(17)-B(18)-B(13) | 107.0(4)  |
| C(2)-B(17)-B(18)-B(22)  | 99.0(3)   |
| B(16)-B(17)-B(18)-B(22) | 37.1(3)   |
| B(13)-B(17)-B(18)-B(22) | 138.3(4)  |
| I(16)-B(17)-B(18)-B(22) | -114.6(4) |
| C(2)-B(17)-B(18)-B(23)  | 61.4(4)   |
| B(22)-B(17)-B(18)-B(23) | -37.6(3)  |
| B(16)-B(17)-B(18)-B(23) | -0.4(4)   |
| B(13)-B(17)-B(18)-B(23) | 100.8(4)  |
| I(16)-B(17)-B(18)-B(23) | -152.2(3) |
| C(2)-B(17)-B(18)-B(19)  | -1.7(4)   |
| B(22)-B(17)-B(18)-B(19) | -100.6(4) |
| B(16)-B(17)-B(18)-B(19) | -63.5(4)  |
| B(13)-B(17)-B(18)-B(19) | 37.7(3)   |
| I(16)-B(17)-B(18)-B(19) | 144.7(3)  |
| C(2)-B(17)-B(18)-I(17)  | -148.6(3) |
| B(22)-B(17)-B(18)-I(17) | 112.5(3)  |
| B(16)-B(17)-B(18)-I(17) | 149.6(3)  |
| B(13)-B(17)-B(18)-I(17) | -109.2(3) |
| I(16)-B(17)-B(18)-I(17) | -2.2(5)   |
| C(2)-B(13)-B(18)-B(17)  | 39.0(3)   |
| B(14)-B(13)-B(18)-B(17) | 100.2(4)  |
| B(19)-B(13)-B(18)-B(17) | 137.8(4)  |
| I(12)-B(13)-B(18)-B(17) | -109.1(4) |
| C(2)-B(13)-B(18)-B(22)  | 1.6(4)    |

|                         |           |
|-------------------------|-----------|
| B(17)-B(13)-B(18)-B(22) | -37.3(3)  |
| B(14)-B(13)-B(18)-B(22) | 62.9(4)   |
| B(19)-B(13)-B(18)-B(22) | 100.5(4)  |
| I(12)-B(13)-B(18)-B(22) | -146.4(3) |
| C(2)-B(13)-B(18)-B(23)  | -61.9(4)  |
| B(17)-B(13)-B(18)-B(23) | -100.9(4) |
| B(14)-B(13)-B(18)-B(23) | -0.6(4)   |
| B(19)-B(13)-B(18)-B(23) | 37.0(3)   |
| I(12)-B(13)-B(18)-B(23) | 150.1(3)  |
| C(2)-B(13)-B(18)-B(19)  | -98.9(3)  |
| B(17)-B(13)-B(18)-B(19) | -137.8(4) |
| B(14)-B(13)-B(18)-B(19) | -37.6(3)  |
| I(12)-B(13)-B(18)-B(19) | 113.1(4)  |
| C(2)-B(13)-B(18)-I(17)  | 149.6(3)  |
| B(17)-B(13)-B(18)-I(17) | 110.7(3)  |
| B(14)-B(13)-B(18)-I(17) | -149.1(3) |
| B(19)-B(13)-B(18)-I(17) | -111.5(3) |
| I(12)-B(13)-B(18)-I(17) | 1.6(5)    |
| C(2)-B(14)-B(19)-B(20)  | -98.6(3)  |
| B(13)-B(14)-B(19)-B(20) | -138.0(3) |
| B(15)-B(14)-B(19)-B(20) | -37.4(3)  |
| I(13)-B(14)-B(19)-B(20) | 114.7(4)  |
| C(2)-B(14)-B(19)-B(23)  | -60.7(4)  |
| B(20)-B(14)-B(19)-B(23) | 37.9(3)   |
| B(13)-B(14)-B(19)-B(23) | -100.1(3) |
| B(15)-B(14)-B(19)-B(23) | 0.5(4)    |
| I(13)-B(14)-B(19)-B(23) | 152.6(3)  |
| C(2)-B(14)-B(19)-B(13)  | 39.4(3)   |
| B(20)-B(14)-B(19)-B(13) | 138.0(3)  |
| B(15)-B(14)-B(19)-B(13) | 100.6(3)  |
| I(13)-B(14)-B(19)-B(13) | -107.3(4) |
| C(2)-B(14)-B(19)-B(18)  | 2.2(4)    |
| B(20)-B(14)-B(19)-B(18) | 100.8(3)  |
| B(13)-B(14)-B(19)-B(18) | -37.2(3)  |
| B(15)-B(14)-B(19)-B(18) | 63.4(4)   |
| I(13)-B(14)-B(19)-B(18) | -144.5(3) |

|                         |           |
|-------------------------|-----------|
| C(2)-B(14)-B(19)-I(18)  | 149.9(3)  |
| B(20)-B(14)-B(19)-I(18) | -111.5(3) |
| B(13)-B(14)-B(19)-I(18) | 110.5(3)  |
| B(15)-B(14)-B(19)-I(18) | -148.9(3) |
| I(13)-B(14)-B(19)-I(18) | 3.2(5)    |
| C(2)-B(13)-B(19)-B(14)  | -39.4(3)  |
| B(18)-B(13)-B(19)-B(14) | -137.8(3) |
| B(17)-B(13)-B(19)-B(14) | -100.3(4) |
| I(12)-B(13)-B(19)-B(14) | 107.6(4)  |
| C(2)-B(13)-B(19)-B(20)  | -1.9(4)   |
| B(18)-B(13)-B(19)-B(20) | -100.4(4) |
| B(17)-B(13)-B(19)-B(20) | -62.9(4)  |
| B(14)-B(13)-B(19)-B(20) | 37.4(3)   |
| I(12)-B(13)-B(19)-B(20) | 145.0(3)  |
| C(2)-B(13)-B(19)-B(23)  | 61.6(4)   |
| B(18)-B(13)-B(19)-B(23) | -36.9(3)  |
| B(17)-B(13)-B(19)-B(23) | 0.7(5)    |
| B(14)-B(13)-B(19)-B(23) | 101.0(4)  |
| I(12)-B(13)-B(19)-B(23) | -151.5(3) |
| C(2)-B(13)-B(19)-B(18)  | 98.5(3)   |
| B(17)-B(13)-B(19)-B(18) | 37.6(3)   |
| B(14)-B(13)-B(19)-B(18) | 137.8(3)  |
| I(12)-B(13)-B(19)-B(18) | -114.6(4) |
| C(2)-B(13)-B(19)-I(18)  | -148.2(3) |
| B(18)-B(13)-B(19)-I(18) | 113.3(4)  |
| B(17)-B(13)-B(19)-I(18) | 150.9(3)  |
| B(14)-B(13)-B(19)-I(18) | -108.8(4) |
| I(12)-B(13)-B(19)-I(18) | -1.3(5)   |
| B(17)-B(18)-B(19)-B(14) | -0.3(4)   |
| B(13)-B(18)-B(19)-B(14) | 37.5(3)   |
| B(22)-B(18)-B(19)-B(14) | -63.8(4)  |
| B(23)-B(18)-B(19)-B(14) | -100.9(4) |
| I(17)-B(18)-B(19)-B(14) | 146.2(3)  |
| B(17)-B(18)-B(19)-B(20) | 62.7(4)   |
| B(13)-B(18)-B(19)-B(20) | 100.5(4)  |
| B(22)-B(18)-B(19)-B(20) | -0.8(4)   |

|                         |           |
|-------------------------|-----------|
| B(23)-B(18)-B(19)-B(20) | -37.9(3)  |
| I(17)-B(18)-B(19)-B(20) | -150.8(3) |
| B(17)-B(18)-B(19)-B(23) | 100.6(4)  |
| B(13)-B(18)-B(19)-B(23) | 138.4(4)  |
| B(22)-B(18)-B(19)-B(23) | 37.1(3)   |
| I(17)-B(18)-B(19)-B(23) | -112.9(4) |
| B(17)-B(18)-B(19)-B(13) | -37.9(3)  |
| B(22)-B(18)-B(19)-B(13) | -101.3(4) |
| B(23)-B(18)-B(19)-B(13) | -138.4(4) |
| I(17)-B(18)-B(19)-B(13) | 108.7(4)  |
| B(17)-B(18)-B(19)-I(18) | -146.4(3) |
| B(13)-B(18)-B(19)-I(18) | -108.5(4) |
| B(22)-B(18)-B(19)-I(18) | 150.2(3)  |
| B(23)-B(18)-B(19)-I(18) | 113.0(4)  |
| I(17)-B(18)-B(19)-I(18) | 0.1(5)    |
| C(2)-B(14)-B(20)-B(15)  | -39.1(3)  |
| B(19)-B(14)-B(20)-B(15) | -138.1(3) |
| B(13)-B(14)-B(20)-B(15) | -100.4(4) |
| I(13)-B(14)-B(20)-B(15) | 109.4(4)  |
| C(2)-B(14)-B(20)-B(19)  | 99.0(3)   |
| B(13)-B(14)-B(20)-B(19) | 37.7(3)   |
| B(15)-B(14)-B(20)-B(19) | 138.1(3)  |
| I(13)-B(14)-B(20)-B(19) | -112.6(4) |
| C(2)-B(14)-B(20)-B(21)  | -1.6(5)   |
| B(19)-B(14)-B(20)-B(21) | -100.6(4) |
| B(13)-B(14)-B(20)-B(21) | -62.8(4)  |
| B(15)-B(14)-B(20)-B(21) | 37.5(3)   |
| I(13)-B(14)-B(20)-B(21) | 146.9(3)  |
| C(2)-B(14)-B(20)-B(23)  | 61.3(4)   |
| B(19)-B(14)-B(20)-B(23) | -37.7(3)  |
| B(13)-B(14)-B(20)-B(23) | 0.0(4)    |
| B(15)-B(14)-B(20)-B(23) | 100.4(4)  |
| I(13)-B(14)-B(20)-B(23) | -150.2(3) |
| C(2)-B(14)-B(20)-I(19)  | -149.3(3) |
| B(19)-B(14)-B(20)-I(19) | 111.7(4)  |
| B(13)-B(14)-B(20)-I(19) | 149.4(3)  |

|                         |           |
|-------------------------|-----------|
| B(15)-B(14)-B(20)-I(19) | -110.3(4) |
| I(13)-B(14)-B(20)-I(19) | -0.9(6)   |
| C(2)-B(15)-B(20)-B(14)  | 39.2(3)   |
| B(16)-B(15)-B(20)-B(14) | 100.9(4)  |
| B(21)-B(15)-B(20)-B(14) | 138.1(4)  |
| I(14)-B(15)-B(20)-B(14) | -106.5(4) |
| C(2)-B(15)-B(20)-B(19)  | 1.6(4)    |
| B(16)-B(15)-B(20)-B(19) | 63.4(4)   |
| B(21)-B(15)-B(20)-B(19) | 100.6(4)  |
| B(14)-B(15)-B(20)-B(19) | -37.6(3)  |
| I(14)-B(15)-B(20)-B(19) | -144.1(3) |
| C(2)-B(15)-B(20)-B(21)  | -98.9(4)  |
| B(16)-B(15)-B(20)-B(21) | -37.2(3)  |
| B(14)-B(15)-B(20)-B(21) | -138.1(4) |
| I(14)-B(15)-B(20)-B(21) | 115.4(4)  |
| C(2)-B(15)-B(20)-B(23)  | -61.7(4)  |
| B(16)-B(15)-B(20)-B(23) | 0.1(4)    |
| B(21)-B(15)-B(20)-B(23) | 37.2(3)   |
| B(14)-B(15)-B(20)-B(23) | -100.9(4) |
| I(14)-B(15)-B(20)-B(23) | 152.6(3)  |
| C(2)-B(15)-B(20)-I(19)  | 150.9(3)  |
| B(16)-B(15)-B(20)-I(19) | -147.4(3) |
| B(21)-B(15)-B(20)-I(19) | -110.2(4) |
| B(14)-B(15)-B(20)-I(19) | 111.7(4)  |
| I(14)-B(15)-B(20)-I(19) | 5.2(5)    |
| B(23)-B(19)-B(20)-B(14) | -137.7(3) |
| B(13)-B(19)-B(20)-B(14) | -37.6(3)  |
| B(18)-B(19)-B(20)-B(14) | -100.1(3) |
| I(18)-B(19)-B(20)-B(14) | 108.3(3)  |
| B(14)-B(19)-B(20)-B(15) | 37.8(3)   |
| B(23)-B(19)-B(20)-B(15) | -100.0(4) |
| B(13)-B(19)-B(20)-B(15) | 0.2(4)    |
| B(18)-B(19)-B(20)-B(15) | -62.3(4)  |
| I(18)-B(19)-B(20)-B(15) | 146.1(3)  |
| B(14)-B(19)-B(20)-B(21) | 101.2(4)  |
| B(23)-B(19)-B(20)-B(21) | -36.5(3)  |



|                         |           |
|-------------------------|-----------|
| B(13)-B(19)-B(20)-B(21) | 63.6(4)   |
| B(18)-B(19)-B(20)-B(21) | 1.1(4)    |
| I(18)-B(19)-B(20)-B(21) | -150.5(3) |
| B(14)-B(19)-B(20)-B(23) | 137.7(3)  |
| B(13)-B(19)-B(20)-B(23) | 100.2(3)  |
| B(18)-B(19)-B(20)-B(23) | 37.6(3)   |
| I(18)-B(19)-B(20)-B(23) | -114.0(4) |
| B(14)-B(19)-B(20)-I(19) | -111.0(4) |
| B(23)-B(19)-B(20)-I(19) | 111.3(4)  |
| B(13)-B(19)-B(20)-I(19) | -148.6(3) |
| B(18)-B(19)-B(20)-I(19) | 148.9(3)  |
| I(18)-B(19)-B(20)-I(19) | -2.7(5)   |
| C(2)-B(16)-B(21)-B(23)  | -61.0(4)  |
| B(22)-B(16)-B(21)-B(23) | 37.5(3)   |
| B(15)-B(16)-B(21)-B(23) | -100.7(4) |
| B(17)-B(16)-B(21)-B(23) | 0.0(4)    |
| I(15)-B(16)-B(21)-B(23) | 147.7(3)  |
| C(2)-B(16)-B(21)-B(22)  | -98.5(4)  |
| B(15)-B(16)-B(21)-B(22) | -138.1(4) |
| B(17)-B(16)-B(21)-B(22) | -37.5(3)  |
| I(15)-B(16)-B(21)-B(22) | 110.3(4)  |
| C(2)-B(16)-B(21)-B(15)  | 39.6(3)   |
| B(22)-B(16)-B(21)-B(15) | 138.1(4)  |
| B(17)-B(16)-B(21)-B(15) | 100.6(4)  |
| I(15)-B(16)-B(21)-B(15) | -111.6(4) |
| C(2)-B(16)-B(21)-B(20)  | 2.7(5)    |
| B(22)-B(16)-B(21)-B(20) | 101.2(4)  |
| B(15)-B(16)-B(21)-B(20) | -36.9(3)  |
| B(17)-B(16)-B(21)-B(20) | 63.7(4)   |
| I(15)-B(16)-B(21)-B(20) | -148.5(3) |
| C(2)-B(16)-B(21)-I(20)  | 149.2(3)  |
| B(22)-B(16)-B(21)-I(20) | -112.3(4) |
| B(15)-B(16)-B(21)-I(20) | 109.6(4)  |
| B(17)-B(16)-B(21)-I(20) | -149.8(3) |
| I(15)-B(16)-B(21)-I(20) | -2.0(5)   |
| C(2)-B(15)-B(21)-B(16)  | -39.8(3)  |

|                         |           |
|-------------------------|-----------|
| B(20)-B(15)-B(21)-B(16) | -138.5(4) |
| B(14)-B(15)-B(21)-B(16) | -101.1(4) |
| I(14)-B(15)-B(21)-B(16) | 108.5(4)  |
| C(2)-B(15)-B(21)-B(23)  | 61.0(4)   |
| B(16)-B(15)-B(21)-B(23) | 100.7(4)  |
| B(20)-B(15)-B(21)-B(23) | -37.7(3)  |
| B(14)-B(15)-B(21)-B(23) | -0.4(4)   |
| I(14)-B(15)-B(21)-B(23) | -150.8(3) |
| C(2)-B(15)-B(21)-B(22)  | -2.6(4)   |
| B(16)-B(15)-B(21)-B(22) | 37.2(3)   |
| B(20)-B(15)-B(21)-B(22) | -101.3(4) |
| B(14)-B(15)-B(21)-B(22) | -63.9(4)  |
| I(14)-B(15)-B(21)-B(22) | 145.7(3)  |
| C(2)-B(15)-B(21)-B(20)  | 98.7(4)   |
| B(16)-B(15)-B(21)-B(20) | 138.5(4)  |
| B(14)-B(15)-B(21)-B(20) | 37.3(3)   |
| I(14)-B(15)-B(21)-B(20) | -113.0(4) |
| C(2)-B(15)-B(21)-I(20)  | -150.0(3) |
| B(16)-B(15)-B(21)-I(20) | -110.2(4) |
| B(20)-B(15)-B(21)-I(20) | 111.3(4)  |
| B(14)-B(15)-B(21)-I(20) | 148.6(3)  |
| I(14)-B(15)-B(21)-I(20) | -1.7(5)   |
| B(14)-B(20)-B(21)-B(16) | -0.7(5)   |
| B(15)-B(20)-B(21)-B(16) | 37.0(3)   |
| B(19)-B(20)-B(21)-B(16) | -64.2(4)  |
| B(23)-B(20)-B(21)-B(16) | -100.9(4) |
| I(19)-B(20)-B(21)-B(16) | 147.4(3)  |
| B(14)-B(20)-B(21)-B(23) | 100.2(4)  |
| B(15)-B(20)-B(21)-B(23) | 137.9(3)  |
| B(19)-B(20)-B(21)-B(23) | 36.7(3)   |
| I(19)-B(20)-B(21)-B(23) | -111.6(4) |
| B(14)-B(20)-B(21)-B(22) | 62.4(4)   |
| B(15)-B(20)-B(21)-B(22) | 100.1(4)  |
| B(19)-B(20)-B(21)-B(22) | -1.1(4)   |
| B(23)-B(20)-B(21)-B(22) | -37.8(3)  |
| I(19)-B(20)-B(21)-B(22) | -149.4(3) |

|                         |           |
|-------------------------|-----------|
| B(14)-B(20)-B(21)-B(15) | -37.7(3)  |
| B(19)-B(20)-B(21)-B(15) | -101.2(4) |
| B(23)-B(20)-B(21)-B(15) | -137.9(3) |
| I(19)-B(20)-B(21)-B(15) | 110.4(4)  |
| B(14)-B(20)-B(21)-I(20) | -146.8(3) |
| B(15)-B(20)-B(21)-I(20) | -109.1(4) |
| B(19)-B(20)-B(21)-I(20) | 149.7(3)  |
| B(23)-B(20)-B(21)-I(20) | 113.0(4)  |
| I(19)-B(20)-B(21)-I(20) | 1.3(5)    |
| C(2)-B(16)-B(22)-B(17)  | -39.0(3)  |
| B(15)-B(16)-B(22)-B(17) | -100.4(3) |
| B(21)-B(16)-B(22)-B(17) | -138.1(3) |
| I(15)-B(16)-B(22)-B(17) | 109.4(4)  |
| C(2)-B(16)-B(22)-B(18)  | -1.8(4)   |
| B(15)-B(16)-B(22)-B(18) | -63.3(4)  |
| B(21)-B(16)-B(22)-B(18) | -100.9(4) |
| B(17)-B(16)-B(22)-B(18) | 37.1(3)   |
| I(15)-B(16)-B(22)-B(18) | 146.6(3)  |
| C(2)-B(16)-B(22)-B(21)  | 99.1(3)   |
| B(15)-B(16)-B(22)-B(21) | 37.6(3)   |
| B(17)-B(16)-B(22)-B(21) | 138.1(3)  |
| I(15)-B(16)-B(22)-B(21) | -112.5(4) |
| C(2)-B(16)-B(22)-B(23)  | 61.8(4)   |
| B(15)-B(16)-B(22)-B(23) | 0.4(4)    |
| B(21)-B(16)-B(22)-B(23) | -37.3(3)  |
| B(17)-B(16)-B(22)-B(23) | 100.8(3)  |
| I(15)-B(16)-B(22)-B(23) | -149.8(3) |
| C(2)-B(16)-B(22)-I(21)  | -149.2(3) |
| B(15)-B(16)-B(22)-I(21) | 149.4(3)  |
| B(21)-B(16)-B(22)-I(21) | 111.8(4)  |
| B(17)-B(16)-B(22)-I(21) | -110.2(3) |
| I(15)-B(16)-B(22)-I(21) | -0.8(5)   |
| C(2)-B(17)-B(22)-B(16)  | 39.4(3)   |
| B(18)-B(17)-B(22)-B(16) | 138.4(3)  |
| B(13)-B(17)-B(22)-B(16) | 101.1(4)  |
| I(16)-B(17)-B(22)-B(16) | -107.3(4) |

|                         |           |
|-------------------------|-----------|
| C(2)-B(17)-B(22)-B(18)  | -98.9(3)  |
| B(16)-B(17)-B(22)-B(18) | -138.4(3) |
| B(13)-B(17)-B(22)-B(18) | -37.3(3)  |
| I(16)-B(17)-B(22)-B(18) | 114.3(4)  |
| C(2)-B(17)-B(22)-B(21)  | 1.9(4)    |
| B(18)-B(17)-B(22)-B(21) | 100.8(4)  |
| B(16)-B(17)-B(22)-B(21) | -37.5(3)  |
| B(13)-B(17)-B(22)-B(21) | 63.5(4)   |
| I(16)-B(17)-B(22)-B(21) | -144.9(3) |
| C(2)-B(17)-B(22)-B(23)  | -61.3(4)  |
| B(18)-B(17)-B(22)-B(23) | 37.6(3)   |
| B(16)-B(17)-B(22)-B(23) | -100.8(4) |
| B(13)-B(17)-B(22)-B(23) | 0.3(5)    |
| I(16)-B(17)-B(22)-B(23) | 151.9(3)  |
| C(2)-B(17)-B(22)-I(21)  | 149.3(3)  |
| B(18)-B(17)-B(22)-I(21) | -111.8(4) |
| B(16)-B(17)-B(22)-I(21) | 109.8(4)  |
| B(13)-B(17)-B(22)-I(21) | -149.1(3) |
| I(16)-B(17)-B(22)-I(21) | 2.5(5)    |
| B(17)-B(18)-B(22)-B(16) | -37.4(3)  |
| B(13)-B(18)-B(22)-B(16) | 0.1(4)    |
| B(23)-B(18)-B(22)-B(16) | 100.6(4)  |
| B(19)-B(18)-B(22)-B(16) | 63.6(4)   |
| I(17)-B(18)-B(22)-B(16) | -146.8(3) |
| B(13)-B(18)-B(22)-B(17) | 37.5(3)   |
| B(23)-B(18)-B(22)-B(17) | 138.0(4)  |
| B(19)-B(18)-B(22)-B(17) | 101.0(4)  |
| I(17)-B(18)-B(22)-B(17) | -109.4(4) |
| B(17)-B(18)-B(22)-B(21) | -100.9(4) |
| B(13)-B(18)-B(22)-B(21) | -63.4(4)  |
| B(23)-B(18)-B(22)-B(21) | 37.1(3)   |
| B(19)-B(18)-B(22)-B(21) | 0.1(4)    |
| I(17)-B(18)-B(22)-B(21) | 149.7(3)  |
| B(17)-B(18)-B(22)-B(23) | -138.0(4) |
| B(13)-B(18)-B(22)-B(23) | -100.4(4) |
| B(19)-B(18)-B(22)-B(23) | -37.0(3)  |

|                         |           |
|-------------------------|-----------|
| I(17)-B(18)-B(22)-B(23) | 112.6(4)  |
| B(17)-B(18)-B(22)-I(21) | 109.2(4)  |
| B(13)-B(18)-B(22)-I(21) | 146.8(3)  |
| B(23)-B(18)-B(22)-I(21) | -112.8(4) |
| B(19)-B(18)-B(22)-I(21) | -149.8(3) |
| I(17)-B(18)-B(22)-I(21) | -0.1(5)   |
| B(23)-B(21)-B(22)-B(16) | -138.2(3) |
| B(15)-B(21)-B(22)-B(16) | -37.3(3)  |
| B(20)-B(21)-B(22)-B(16) | -100.3(4) |
| I(20)-B(21)-B(22)-B(16) | 109.3(4)  |
| B(16)-B(21)-B(22)-B(17) | 37.7(3)   |
| B(23)-B(21)-B(22)-B(17) | -100.5(4) |
| B(15)-B(21)-B(22)-B(17) | 0.4(5)    |
| B(20)-B(21)-B(22)-B(17) | -62.6(4)  |
| I(20)-B(21)-B(22)-B(17) | 147.0(3)  |
| B(16)-B(21)-B(22)-B(18) | 100.9(3)  |
| B(23)-B(21)-B(22)-B(18) | -37.3(3)  |
| B(15)-B(21)-B(22)-B(18) | 63.7(4)   |
| B(20)-B(21)-B(22)-B(18) | 0.6(4)    |
| I(20)-B(21)-B(22)-B(18) | -149.8(3) |
| B(16)-B(21)-B(22)-B(23) | 138.2(3)  |
| B(15)-B(21)-B(22)-B(23) | 100.9(4)  |
| B(20)-B(21)-B(22)-B(23) | 37.9(3)   |
| I(20)-B(21)-B(22)-B(23) | -112.6(4) |
| B(16)-B(21)-B(22)-I(21) | -109.2(4) |
| B(23)-B(21)-B(22)-I(21) | 112.7(4)  |
| B(15)-B(21)-B(22)-I(21) | -146.4(3) |
| B(20)-B(21)-B(22)-I(21) | 150.5(3)  |
| I(20)-B(21)-B(22)-I(21) | 0.1(5)    |
| B(16)-B(21)-B(23)-B(22) | -37.2(3)  |
| B(15)-B(21)-B(23)-B(22) | -100.4(3) |
| B(20)-B(21)-B(23)-B(22) | -137.9(3) |
| I(20)-B(21)-B(23)-B(22) | 111.6(4)  |
| B(16)-B(21)-B(23)-B(19) | 63.9(4)   |
| B(22)-B(21)-B(23)-B(19) | 101.1(3)  |
| B(15)-B(21)-B(23)-B(19) | 0.7(4)    |

|                         |           |
|-------------------------|-----------|
| B(20)-B(21)-B(23)-B(19) | -36.7(3)  |
| I(20)-B(21)-B(23)-B(19) | -147.3(3) |
| B(16)-B(21)-B(23)-B(18) | -0.2(4)   |
| B(22)-B(21)-B(23)-B(18) | 37.0(3)   |
| B(15)-B(21)-B(23)-B(18) | -63.4(4)  |
| B(20)-B(21)-B(23)-B(18) | -100.9(3) |
| I(20)-B(21)-B(23)-B(18) | 148.6(3)  |
| B(16)-B(21)-B(23)-B(20) | 100.6(3)  |
| B(22)-B(21)-B(23)-B(20) | 137.9(3)  |
| B(15)-B(21)-B(23)-B(20) | 37.4(3)   |
| I(20)-B(21)-B(23)-B(20) | -110.5(4) |
| B(16)-B(21)-B(23)-I(22) | -149.2(3) |
| B(22)-B(21)-B(23)-I(22) | -112.0(3) |
| B(15)-B(21)-B(23)-I(22) | 147.6(3)  |
| B(20)-B(21)-B(23)-I(22) | 110.1(4)  |
| I(20)-B(21)-B(23)-I(22) | -0.4(5)   |
| B(16)-B(22)-B(23)-B(21) | 37.4(3)   |
| B(17)-B(22)-B(23)-B(21) | 101.1(4)  |
| B(18)-B(22)-B(23)-B(21) | 138.5(3)  |
| I(21)-B(22)-B(23)-B(21) | -110.5(4) |
| B(16)-B(22)-B(23)-B(19) | -63.6(4)  |
| B(17)-B(22)-B(23)-B(19) | 0.1(5)    |
| B(18)-B(22)-B(23)-B(19) | 37.5(3)   |
| B(21)-B(22)-B(23)-B(19) | -101.0(4) |
| I(21)-B(22)-B(23)-B(19) | 148.5(3)  |
| B(16)-B(22)-B(23)-B(18) | -101.1(4) |
| B(17)-B(22)-B(23)-B(18) | -37.4(3)  |
| B(21)-B(22)-B(23)-B(18) | -138.5(3) |
| I(21)-B(22)-B(23)-B(18) | 111.0(4)  |
| B(16)-B(22)-B(23)-B(20) | -0.3(4)   |
| B(17)-B(22)-B(23)-B(20) | 63.4(4)   |
| B(18)-B(22)-B(23)-B(20) | 100.8(4)  |
| B(21)-B(22)-B(23)-B(20) | -37.7(3)  |
| I(21)-B(22)-B(23)-B(20) | -148.3(3) |
| B(16)-B(22)-B(23)-I(22) | 147.9(3)  |
| B(17)-B(22)-B(23)-I(22) | -148.4(3) |

|                         |           |
|-------------------------|-----------|
| B(18)-B(22)-B(23)-I(22) | -111.0(4) |
| B(21)-B(22)-B(23)-I(22) | 110.6(4)  |
| I(21)-B(22)-B(23)-I(22) | 0.0(5)    |
| B(14)-B(19)-B(23)-B(21) | -0.7(4)   |
| B(20)-B(19)-B(23)-B(21) | 36.9(3)   |
| B(13)-B(19)-B(23)-B(21) | -64.1(4)  |
| B(18)-B(19)-B(23)-B(21) | -100.7(4) |
| I(18)-B(19)-B(23)-B(21) | 147.0(3)  |
| B(14)-B(19)-B(23)-B(22) | 62.9(4)   |
| B(20)-B(19)-B(23)-B(22) | 100.5(4)  |
| B(13)-B(19)-B(23)-B(22) | -0.5(5)   |
| B(18)-B(19)-B(23)-B(22) | -37.1(3)  |
| I(18)-B(19)-B(23)-B(22) | -149.4(3) |
| B(14)-B(19)-B(23)-B(18) | 100.0(4)  |
| B(20)-B(19)-B(23)-B(18) | 137.6(4)  |
| B(13)-B(19)-B(23)-B(18) | 36.7(3)   |
| I(18)-B(19)-B(23)-B(18) | -112.3(4) |
| B(14)-B(19)-B(23)-B(20) | -37.6(3)  |
| B(13)-B(19)-B(23)-B(20) | -101.0(4) |
| B(18)-B(19)-B(23)-B(20) | -137.6(4) |
| I(18)-B(19)-B(23)-B(20) | 110.1(4)  |
| B(14)-B(19)-B(23)-I(22) | -148.0(3) |
| B(20)-B(19)-B(23)-I(22) | -110.3(4) |
| B(13)-B(19)-B(23)-I(22) | 148.7(3)  |
| B(18)-B(19)-B(23)-I(22) | 112.0(4)  |
| I(18)-B(19)-B(23)-I(22) | -0.3(5)   |
| B(17)-B(18)-B(23)-B(21) | 0.4(4)    |
| B(13)-B(18)-B(23)-B(21) | 64.2(4)   |
| B(22)-B(18)-B(23)-B(21) | -37.1(3)  |
| B(19)-B(18)-B(23)-B(21) | 101.3(4)  |
| I(17)-B(18)-B(23)-B(21) | -148.7(3) |
| B(17)-B(18)-B(23)-B(22) | 37.5(3)   |
| B(13)-B(18)-B(23)-B(22) | 101.3(4)  |
| B(19)-B(18)-B(23)-B(22) | 138.5(4)  |
| I(17)-B(18)-B(23)-B(22) | -111.6(4) |
| B(17)-B(18)-B(23)-B(19) | -100.9(4) |

|                         |           |
|-------------------------|-----------|
| B(13)-B(18)-B(23)-B(19) | -37.1(3)  |
| B(22)-B(18)-B(23)-B(19) | -138.5(4) |
| I(17)-B(18)-B(23)-B(19) | 110.0(4)  |
| B(17)-B(18)-B(23)-B(20) | -63.2(4)  |
| B(13)-B(18)-B(23)-B(20) | 0.6(4)    |
| B(22)-B(18)-B(23)-B(20) | -100.7(4) |
| B(19)-B(18)-B(23)-B(20) | 37.7(3)   |
| I(17)-B(18)-B(23)-B(20) | 147.7(3)  |
| B(17)-B(18)-B(23)-I(22) | 149.2(3)  |
| B(13)-B(18)-B(23)-I(22) | -146.9(3) |
| B(22)-B(18)-B(23)-I(22) | 111.7(4)  |
| B(19)-B(18)-B(23)-I(22) | -109.8(4) |
| I(17)-B(18)-B(23)-I(22) | 0.1(5)    |
| B(14)-B(20)-B(23)-B(21) | -101.2(4) |
| B(15)-B(20)-B(23)-B(21) | -37.5(3)  |
| B(19)-B(20)-B(23)-B(21) | -138.9(3) |
| I(19)-B(20)-B(23)-B(21) | 109.5(4)  |
| B(14)-B(20)-B(23)-B(22) | -63.6(4)  |
| B(15)-B(20)-B(23)-B(22) | 0.2(4)    |
| B(19)-B(20)-B(23)-B(22) | -101.3(4) |
| B(21)-B(20)-B(23)-B(22) | 37.6(3)   |
| I(19)-B(20)-B(23)-B(22) | 147.2(3)  |
| B(14)-B(20)-B(23)-B(19) | 37.7(3)   |
| B(15)-B(20)-B(23)-B(19) | 101.5(4)  |
| B(21)-B(20)-B(23)-B(19) | 138.9(3)  |
| I(19)-B(20)-B(23)-B(19) | -111.6(4) |
| B(14)-B(20)-B(23)-B(18) | -0.4(5)   |
| B(15)-B(20)-B(23)-B(18) | 63.3(4)   |
| B(19)-B(20)-B(23)-B(18) | -38.1(3)  |
| B(21)-B(20)-B(23)-B(18) | 100.8(4)  |
| I(19)-B(20)-B(23)-B(18) | -149.7(3) |
| B(14)-B(20)-B(23)-I(22) | 147.6(3)  |
| B(15)-B(20)-B(23)-I(22) | -148.7(3) |
| B(19)-B(20)-B(23)-I(22) | 109.9(4)  |
| B(21)-B(20)-B(23)-I(22) | -111.2(4) |
| I(19)-B(20)-B(23)-I(22) | -1.7(5)   |



|                        |           |
|------------------------|-----------|
| B(25)-C(3)-B(24)-B(30) | -40.5(3)  |
| B(28)-C(3)-B(24)-B(30) | 102.8(3)  |
| B(27)-C(3)-B(24)-B(30) | 66.1(4)   |
| B(26)-C(3)-B(24)-B(30) | -3.5(4)   |
| B(25)-C(3)-B(24)-B(29) | -102.9(3) |
| B(28)-C(3)-B(24)-B(29) | 40.4(3)   |
| B(27)-C(3)-B(24)-B(29) | 3.8(4)    |
| B(26)-C(3)-B(24)-B(29) | -65.9(4)  |
| B(28)-C(3)-B(24)-B(25) | 143.3(3)  |
| B(27)-C(3)-B(24)-B(25) | 106.6(3)  |
| B(26)-C(3)-B(24)-B(25) | 37.0(3)   |
| B(25)-C(3)-B(24)-B(28) | -143.3(3) |
| B(27)-C(3)-B(24)-B(28) | -36.6(3)  |
| B(26)-C(3)-B(24)-B(28) | -106.3(3) |
| B(25)-C(3)-B(24)-I(23) | 107.5(3)  |
| B(28)-C(3)-B(24)-I(23) | -109.2(3) |
| B(27)-C(3)-B(24)-I(23) | -145.9(3) |
| B(26)-C(3)-B(24)-I(23) | 144.5(3)  |
| B(24)-C(3)-B(25)-B(31) | 102.6(3)  |
| B(28)-C(3)-B(25)-B(31) | 66.7(4)   |
| B(27)-C(3)-B(25)-B(31) | -3.4(4)   |
| B(26)-C(3)-B(25)-B(31) | -39.6(3)  |
| B(28)-C(3)-B(25)-B(24) | -35.8(3)  |
| B(27)-C(3)-B(25)-B(24) | -105.9(3) |
| B(26)-C(3)-B(25)-B(24) | -142.2(3) |
| B(24)-C(3)-B(25)-B(30) | 40.0(3)   |
| B(28)-C(3)-B(25)-B(30) | 4.2(4)    |
| B(27)-C(3)-B(25)-B(30) | -65.9(4)  |
| B(26)-C(3)-B(25)-B(30) | -102.2(3) |
| B(24)-C(3)-B(25)-B(26) | 142.2(3)  |
| B(28)-C(3)-B(25)-B(26) | 106.4(3)  |
| B(27)-C(3)-B(25)-B(26) | 36.3(3)   |
| B(24)-C(3)-B(25)-I(24) | -108.0(3) |
| B(28)-C(3)-B(25)-I(24) | -143.8(3) |
| B(27)-C(3)-B(25)-I(24) | 146.1(3)  |
| B(26)-C(3)-B(25)-I(24) | 109.8(3)  |

|                         |           |
|-------------------------|-----------|
| B(30)-B(24)-B(25)-C(3)  | 133.8(3)  |
| B(29)-B(24)-B(25)-C(3)  | 96.4(3)   |
| B(28)-B(24)-B(25)-C(3)  | 32.6(3)   |
| I(23)-B(24)-B(25)-C(3)  | -112.7(3) |
| C(3)-B(24)-B(25)-B(31)  | -96.3(3)  |
| B(30)-B(24)-B(25)-B(31) | 37.5(3)   |
| B(29)-B(24)-B(25)-B(31) | 0.1(4)    |
| B(28)-B(24)-B(25)-B(31) | -63.7(4)  |
| I(23)-B(24)-B(25)-B(31) | 151.0(3)  |
| C(3)-B(24)-B(25)-B(30)  | -133.8(3) |
| B(29)-B(24)-B(25)-B(30) | -37.4(3)  |
| B(28)-B(24)-B(25)-B(30) | -101.2(3) |
| I(23)-B(24)-B(25)-B(30) | 113.5(3)  |
| C(3)-B(24)-B(25)-B(26)  | -33.4(3)  |
| B(30)-B(24)-B(25)-B(26) | 100.5(3)  |
| B(29)-B(24)-B(25)-B(26) | 63.1(4)   |
| B(28)-B(24)-B(25)-B(26) | -0.7(4)   |
| I(23)-B(24)-B(25)-B(26) | -146.1(3) |
| C(3)-B(24)-B(25)-I(24)  | 109.7(3)  |
| B(30)-B(24)-B(25)-I(24) | -116.5(3) |
| B(29)-B(24)-B(25)-I(24) | -153.9(3) |
| B(28)-B(24)-B(25)-I(24) | 142.3(3)  |
| I(23)-B(24)-B(25)-I(24) | -3.0(4)   |
| B(24)-C(3)-B(26)-B(32)  | 65.9(4)   |
| B(25)-C(3)-B(26)-B(32)  | 102.7(3)  |
| B(28)-C(3)-B(26)-B(32)  | -3.9(4)   |
| B(27)-C(3)-B(26)-B(32)  | -40.1(3)  |
| B(24)-C(3)-B(26)-B(31)  | 2.8(4)    |
| B(25)-C(3)-B(26)-B(31)  | 39.6(3)   |
| B(28)-C(3)-B(26)-B(31)  | -67.0(4)  |
| B(27)-C(3)-B(26)-B(31)  | -103.2(3) |
| B(24)-C(3)-B(26)-B(27)  | 106.1(3)  |
| B(25)-C(3)-B(26)-B(27)  | 142.8(3)  |
| B(28)-C(3)-B(26)-B(27)  | 36.2(3)   |
| B(24)-C(3)-B(26)-B(25)  | -36.8(3)  |
| B(28)-C(3)-B(26)-B(25)  | -106.6(3) |

|                         |           |
|-------------------------|-----------|
| B(27)-C(3)-B(26)-B(25)  | -142.8(3) |
| B(24)-C(3)-B(26)-I(25)  | -145.6(3) |
| B(25)-C(3)-B(26)-I(25)  | -108.8(3) |
| B(28)-C(3)-B(26)-I(25)  | 144.6(3)  |
| B(27)-C(3)-B(26)-I(25)  | 108.4(3)  |
| B(31)-B(25)-B(26)-C(3)  | 134.3(3)  |
| B(24)-B(25)-B(26)-C(3)  | 33.3(3)   |
| B(30)-B(25)-B(26)-C(3)  | 96.4(3)   |
| I(24)-B(25)-B(26)-C(3)  | -109.1(3) |
| C(3)-B(25)-B(26)-B(32)  | -96.5(3)  |
| B(31)-B(25)-B(26)-B(32) | 37.7(3)   |
| B(24)-B(25)-B(26)-B(32) | -63.2(4)  |
| B(30)-B(25)-B(26)-B(32) | -0.2(4)   |
| I(24)-B(25)-B(26)-B(32) | 154.4(3)  |
| C(3)-B(25)-B(26)-B(31)  | -134.3(3) |
| B(24)-B(25)-B(26)-B(31) | -100.9(3) |
| B(30)-B(25)-B(26)-B(31) | -37.9(3)  |
| I(24)-B(25)-B(26)-B(31) | 116.7(3)  |
| C(3)-B(25)-B(26)-B(27)  | -32.7(3)  |
| B(31)-B(25)-B(26)-B(27) | 101.5(3)  |
| B(24)-B(25)-B(26)-B(27) | 0.6(4)    |
| B(30)-B(25)-B(26)-B(27) | 63.6(4)   |
| I(24)-B(25)-B(26)-B(27) | -141.8(3) |
| C(3)-B(25)-B(26)-I(25)  | 111.8(3)  |
| B(31)-B(25)-B(26)-I(25) | -113.9(3) |
| B(24)-B(25)-B(26)-I(25) | 145.1(3)  |
| B(30)-B(25)-B(26)-I(25) | -151.8(3) |
| I(24)-B(25)-B(26)-I(25) | 2.7(4)    |
| B(24)-C(3)-B(27)-B(33)  | -3.9(4)   |
| B(25)-C(3)-B(27)-B(33)  | 65.9(4)   |
| B(28)-C(3)-B(27)-B(33)  | -40.5(3)  |
| B(26)-C(3)-B(27)-B(33)  | 102.4(3)  |
| B(24)-C(3)-B(27)-B(32)  | -66.8(4)  |
| B(25)-C(3)-B(27)-B(32)  | 3.1(4)    |
| B(28)-C(3)-B(27)-B(32)  | -103.3(3) |
| B(26)-C(3)-B(27)-B(32)  | 39.5(3)   |

|                         |           |
|-------------------------|-----------|
| B(24)-C(3)-B(27)-B(26)  | -106.3(3) |
| B(25)-C(3)-B(27)-B(26)  | -36.5(3)  |
| B(28)-C(3)-B(27)-B(26)  | -142.9(3) |
| B(24)-C(3)-B(27)-B(28)  | 36.6(3)   |
| B(25)-C(3)-B(27)-B(28)  | 106.4(3)  |
| B(26)-C(3)-B(27)-B(28)  | 142.9(3)  |
| B(24)-C(3)-B(27)-I(26)  | 144.3(3)  |
| B(25)-C(3)-B(27)-I(26)  | -145.9(3) |
| B(28)-C(3)-B(27)-I(26)  | 107.7(3)  |
| B(26)-C(3)-B(27)-I(26)  | -109.4(3) |
| B(32)-B(26)-B(27)-C(3)  | 134.2(3)  |
| B(31)-B(26)-B(27)-C(3)  | 95.7(3)   |
| B(25)-B(26)-B(27)-C(3)  | 32.6(3)   |
| I(25)-B(26)-B(27)-C(3)  | -112.1(3) |
| C(3)-B(26)-B(27)-B(33)  | -96.5(3)  |
| B(32)-B(26)-B(27)-B(33) | 37.7(3)   |
| B(31)-B(26)-B(27)-B(33) | -0.8(4)   |
| B(25)-B(26)-B(27)-B(33) | -63.9(4)  |
| I(25)-B(26)-B(27)-B(33) | 151.3(3)  |
| C(3)-B(26)-B(27)-B(32)  | -134.2(3) |
| B(31)-B(26)-B(27)-B(32) | -38.5(3)  |
| B(25)-B(26)-B(27)-B(32) | -101.6(3) |
| I(25)-B(26)-B(27)-B(32) | 113.6(3)  |
| C(3)-B(26)-B(27)-B(28)  | -32.8(3)  |
| B(32)-B(26)-B(27)-B(28) | 101.4(3)  |
| B(31)-B(26)-B(27)-B(28) | 62.9(4)   |
| B(25)-B(26)-B(27)-B(28) | -0.2(4)   |
| I(25)-B(26)-B(27)-B(28) | -144.9(3) |
| C(3)-B(26)-B(27)-I(26)  | 110.2(3)  |
| B(32)-B(26)-B(27)-I(26) | -115.5(3) |
| B(31)-B(26)-B(27)-I(26) | -154.1(3) |
| B(25)-B(26)-B(27)-I(26) | 142.8(3)  |
| I(25)-B(26)-B(27)-I(26) | -1.9(4)   |
| B(25)-C(3)-B(28)-B(24)  | 35.8(3)   |
| B(27)-C(3)-B(28)-B(24)  | 142.4(3)  |
| B(26)-C(3)-B(28)-B(24)  | 106.2(4)  |

|                         |           |
|-------------------------|-----------|
| B(24)-C(3)-B(28)-B(29)  | -40.1(3)  |
| B(25)-C(3)-B(28)-B(29)  | -4.3(4)   |
| B(27)-C(3)-B(28)-B(29)  | 102.2(3)  |
| B(26)-C(3)-B(28)-B(29)  | 66.1(4)   |
| B(24)-C(3)-B(28)-B(33)  | -102.4(3) |
| B(25)-C(3)-B(28)-B(33)  | -66.6(4)  |
| B(27)-C(3)-B(28)-B(33)  | 40.0(3)   |
| B(26)-C(3)-B(28)-B(33)  | 3.8(4)    |
| B(24)-C(3)-B(28)-B(27)  | -142.4(3) |
| B(25)-C(3)-B(28)-B(27)  | -106.6(3) |
| B(26)-C(3)-B(28)-B(27)  | -36.2(3)  |
| B(24)-C(3)-B(28)-I(27)  | 108.7(3)  |
| B(25)-C(3)-B(28)-I(27)  | 144.5(3)  |
| B(27)-C(3)-B(28)-I(27)  | -108.9(3) |
| B(26)-C(3)-B(28)-I(27)  | -145.1(3) |
| B(30)-B(24)-B(28)-C(3)  | -96.7(3)  |
| B(29)-B(24)-B(28)-C(3)  | -133.7(3) |
| B(25)-B(24)-B(28)-C(3)  | -32.6(3)  |
| I(23)-B(24)-B(28)-C(3)  | 112.1(3)  |
| C(3)-B(24)-B(28)-B(29)  | 133.7(3)  |
| B(30)-B(24)-B(28)-B(29) | 37.0(3)   |
| B(25)-B(24)-B(28)-B(29) | 101.1(3)  |
| I(23)-B(24)-B(28)-B(29) | -114.2(3) |
| C(3)-B(24)-B(28)-B(33)  | 96.0(3)   |
| B(30)-B(24)-B(28)-B(33) | -0.7(4)   |
| B(29)-B(24)-B(28)-B(33) | -37.7(3)  |
| B(25)-B(24)-B(28)-B(33) | 63.4(4)   |
| I(23)-B(24)-B(28)-B(33) | -151.9(3) |
| C(3)-B(24)-B(28)-B(27)  | 33.2(3)   |
| B(30)-B(24)-B(28)-B(27) | -63.4(4)  |
| B(29)-B(24)-B(28)-B(27) | -100.5(3) |
| B(25)-B(24)-B(28)-B(27) | 0.6(4)    |
| I(23)-B(24)-B(28)-B(27) | 145.4(3)  |
| C(3)-B(24)-B(28)-I(27)  | -111.0(3) |
| B(30)-B(24)-B(28)-I(27) | 152.4(3)  |
| B(29)-B(24)-B(28)-I(27) | 115.3(3)  |

|                         |           |
|-------------------------|-----------|
| B(25)-B(24)-B(28)-I(27) | -143.6(3) |
| I(23)-B(24)-B(28)-I(27) | 1.2(4)    |
| B(33)-B(27)-B(28)-C(3)  | 133.6(3)  |
| B(32)-B(27)-B(28)-C(3)  | 95.8(3)   |
| B(26)-B(27)-B(28)-C(3)  | 32.9(3)   |
| I(26)-B(27)-B(28)-C(3)  | -110.6(3) |
| C(3)-B(27)-B(28)-B(24)  | -33.2(3)  |
| B(33)-B(27)-B(28)-B(24) | 100.4(3)  |
| B(32)-B(27)-B(28)-B(24) | 62.6(4)   |
| B(26)-B(27)-B(28)-B(24) | -0.2(4)   |
| I(26)-B(27)-B(28)-B(24) | -143.8(3) |
| C(3)-B(27)-B(28)-B(29)  | -96.3(3)  |
| B(33)-B(27)-B(28)-B(29) | 37.3(3)   |
| B(32)-B(27)-B(28)-B(29) | -0.5(4)   |
| B(26)-B(27)-B(28)-B(29) | -63.4(4)  |
| I(26)-B(27)-B(28)-B(29) | 153.1(3)  |
| C(3)-B(27)-B(28)-B(33)  | -133.6(3) |
| B(32)-B(27)-B(28)-B(33) | -37.8(3)  |
| B(26)-B(27)-B(28)-B(33) | -100.7(3) |
| I(26)-B(27)-B(28)-B(33) | 115.8(3)  |
| C(3)-B(27)-B(28)-I(27)  | 110.9(3)  |
| B(33)-B(27)-B(28)-I(27) | -115.4(3) |
| B(32)-B(27)-B(28)-I(27) | -153.2(3) |
| B(26)-B(27)-B(28)-I(27) | 143.9(3)  |
| I(26)-B(27)-B(28)-I(27) | 0.3(4)    |
| C(3)-B(24)-B(29)-B(30)  | 99.0(3)   |
| B(25)-B(24)-B(29)-B(30) | 37.6(3)   |
| B(28)-B(24)-B(29)-B(30) | 138.8(3)  |
| I(23)-B(24)-B(29)-B(30) | -111.8(4) |
| C(3)-B(24)-B(29)-B(28)  | -39.7(3)  |
| B(30)-B(24)-B(29)-B(28) | -138.8(3) |
| B(25)-B(24)-B(29)-B(28) | -101.2(3) |
| I(23)-B(24)-B(29)-B(28) | 109.5(4)  |
| C(3)-B(24)-B(29)-B(33)  | -2.0(4)   |
| B(30)-B(24)-B(29)-B(33) | -101.1(3) |
| B(25)-B(24)-B(29)-B(33) | -63.5(4)  |

|                         |           |
|-------------------------|-----------|
| B(28)-B(24)-B(29)-B(33) | 37.7(3)   |
| I(23)-B(24)-B(29)-B(33) | 147.2(3)  |
| C(3)-B(24)-B(29)-B(34)  | 61.0(4)   |
| B(30)-B(24)-B(29)-B(34) | -38.1(3)  |
| B(25)-B(24)-B(29)-B(34) | -0.5(4)   |
| B(28)-B(24)-B(29)-B(34) | 100.7(3)  |
| I(23)-B(24)-B(29)-B(34) | -149.8(3) |
| C(3)-B(24)-B(29)-I(28)  | -148.8(3) |
| B(30)-B(24)-B(29)-I(28) | 112.1(3)  |
| B(25)-B(24)-B(29)-I(28) | 149.7(3)  |
| B(28)-B(24)-B(29)-I(28) | -109.1(3) |
| I(23)-B(24)-B(29)-I(28) | 0.3(5)    |
| C(3)-B(28)-B(29)-B(24)  | 39.5(3)   |
| B(33)-B(28)-B(29)-B(24) | 137.8(3)  |
| B(27)-B(28)-B(29)-B(24) | 100.8(3)  |
| I(27)-B(28)-B(29)-B(24) | -108.0(4) |
| C(3)-B(28)-B(29)-B(30)  | 2.6(4)    |
| B(24)-B(28)-B(29)-B(30) | -36.9(3)  |
| B(33)-B(28)-B(29)-B(30) | 100.8(3)  |
| B(27)-B(28)-B(29)-B(30) | 63.8(4)   |
| I(27)-B(28)-B(29)-B(30) | -144.9(3) |
| C(3)-B(28)-B(29)-B(33)  | -98.2(3)  |
| B(24)-B(28)-B(29)-B(33) | -137.8(3) |
| B(27)-B(28)-B(29)-B(33) | -37.0(3)  |
| I(27)-B(28)-B(29)-B(33) | 114.2(4)  |
| C(3)-B(28)-B(29)-B(34)  | -61.2(4)  |
| B(24)-B(28)-B(29)-B(34) | -100.7(3) |
| B(33)-B(28)-B(29)-B(34) | 37.1(3)   |
| B(27)-B(28)-B(29)-B(34) | 0.1(4)    |
| I(27)-B(28)-B(29)-B(34) | 151.3(3)  |
| C(3)-B(28)-B(29)-I(28)  | 150.3(3)  |
| B(24)-B(28)-B(29)-I(28) | 110.8(3)  |
| B(33)-B(28)-B(29)-I(28) | -111.4(3) |
| B(27)-B(28)-B(29)-I(28) | -148.4(3) |
| I(27)-B(28)-B(29)-I(28) | 2.8(5)    |
| C(3)-B(24)-B(30)-B(29)  | -98.6(3)  |

|                         |           |
|-------------------------|-----------|
| B(25)-B(24)-B(30)-B(29) | -138.3(3) |
| B(28)-B(24)-B(30)-B(29) | -37.1(3)  |
| I(23)-B(24)-B(30)-B(29) | 113.5(3)  |
| C(3)-B(24)-B(30)-B(25)  | 39.7(3)   |
| B(29)-B(24)-B(30)-B(25) | 138.3(3)  |
| B(28)-B(24)-B(30)-B(25) | 101.2(3)  |
| I(23)-B(24)-B(30)-B(25) | -108.2(3) |
| C(3)-B(24)-B(30)-B(34)  | -60.6(4)  |
| B(29)-B(24)-B(30)-B(34) | 38.0(3)   |
| B(25)-B(24)-B(30)-B(34) | -100.3(3) |
| B(28)-B(24)-B(30)-B(34) | 0.9(4)    |
| I(23)-B(24)-B(30)-B(34) | 151.4(3)  |
| C(3)-B(24)-B(30)-B(31)  | 2.7(4)    |
| B(29)-B(24)-B(30)-B(31) | 101.3(3)  |
| B(25)-B(24)-B(30)-B(31) | -37.0(3)  |
| B(28)-B(24)-B(30)-B(31) | 64.2(4)   |
| I(23)-B(24)-B(30)-B(31) | -145.2(3) |
| C(3)-B(24)-B(30)-I(29)  | 149.3(3)  |
| B(29)-B(24)-B(30)-I(29) | -112.1(3) |
| B(25)-B(24)-B(30)-I(29) | 109.6(3)  |
| B(28)-B(24)-B(30)-I(29) | -149.2(3) |
| I(23)-B(24)-B(30)-I(29) | 1.4(5)    |
| B(28)-B(29)-B(30)-B(24) | 37.0(3)   |
| B(33)-B(29)-B(30)-B(24) | 100.5(3)  |
| B(34)-B(29)-B(30)-B(24) | 137.5(3)  |
| I(28)-B(29)-B(30)-B(24) | -109.8(3) |
| B(24)-B(29)-B(30)-B(25) | -37.2(3)  |
| B(28)-B(29)-B(30)-B(25) | -0.2(4)   |
| B(33)-B(29)-B(30)-B(25) | 63.3(4)   |
| B(34)-B(29)-B(30)-B(25) | 100.3(3)  |
| I(28)-B(29)-B(30)-B(25) | -147.0(3) |
| B(24)-B(29)-B(30)-B(34) | -137.5(3) |
| B(28)-B(29)-B(30)-B(34) | -100.5(3) |
| B(33)-B(29)-B(30)-B(34) | -37.0(3)  |
| I(28)-B(29)-B(30)-B(34) | 112.7(3)  |
| B(24)-B(29)-B(30)-B(31) | -100.2(3) |



|                         |           |
|-------------------------|-----------|
| B(28)-B(29)-B(30)-B(31) | -63.2(4)  |
| B(33)-B(29)-B(30)-B(31) | 0.3(4)    |
| B(34)-B(29)-B(30)-B(31) | 37.3(3)   |
| I(28)-B(29)-B(30)-B(31) | 150.0(3)  |
| B(24)-B(29)-B(30)-I(29) | 110.2(3)  |
| B(28)-B(29)-B(30)-I(29) | 147.1(3)  |
| B(33)-B(29)-B(30)-I(29) | -149.3(3) |
| B(34)-B(29)-B(30)-I(29) | -112.4(3) |
| I(28)-B(29)-B(30)-I(29) | 0.4(5)    |
| C(3)-B(25)-B(30)-B(24)  | -39.5(3)  |
| B(31)-B(25)-B(30)-B(24) | -138.2(3) |
| B(26)-B(25)-B(30)-B(24) | -100.7(3) |
| I(24)-B(25)-B(30)-B(24) | 106.3(3)  |
| C(3)-B(25)-B(30)-B(29)  | -2.2(4)   |
| B(31)-B(25)-B(30)-B(29) | -101.0(3) |
| B(24)-B(25)-B(30)-B(29) | 37.3(3)   |
| B(26)-B(25)-B(30)-B(29) | -63.4(4)  |
| I(24)-B(25)-B(30)-B(29) | 143.6(3)  |
| C(3)-B(25)-B(30)-B(34)  | 61.3(4)   |
| B(31)-B(25)-B(30)-B(34) | -37.5(3)  |
| B(24)-B(25)-B(30)-B(34) | 100.8(3)  |
| B(26)-B(25)-B(30)-B(34) | 0.1(4)    |
| I(24)-B(25)-B(30)-B(34) | -152.9(3) |
| C(3)-B(25)-B(30)-B(31)  | 98.8(3)   |
| B(24)-B(25)-B(30)-B(31) | 138.2(3)  |
| B(26)-B(25)-B(30)-B(31) | 37.5(3)   |
| I(24)-B(25)-B(30)-B(31) | -115.5(4) |
| C(3)-B(25)-B(30)-I(29)  | -150.4(3) |
| B(31)-B(25)-B(30)-I(29) | 110.9(3)  |
| B(24)-B(25)-B(30)-I(29) | -110.9(3) |
| B(26)-B(25)-B(30)-I(29) | 148.4(3)  |
| I(24)-B(25)-B(30)-I(29) | -4.6(5)   |
| C(3)-B(26)-B(31)-B(25)  | -38.9(3)  |
| B(32)-B(26)-B(31)-B(25) | -138.4(3) |
| B(27)-B(26)-B(31)-B(25) | -100.1(3) |
| I(25)-B(26)-B(31)-B(25) | 109.0(3)  |

|                         |           |
|-------------------------|-----------|
| C(3)-B(26)-B(31)-B(34)  | 62.4(4)   |
| B(32)-B(26)-B(31)-B(34) | -37.1(3)  |
| B(27)-B(26)-B(31)-B(34) | 1.2(4)    |
| B(25)-B(26)-B(31)-B(34) | 101.3(3)  |
| I(25)-B(26)-B(31)-B(34) | -149.8(3) |
| C(3)-B(26)-B(31)-B(30)  | -0.9(4)   |
| B(32)-B(26)-B(31)-B(30) | -100.4(3) |
| B(27)-B(26)-B(31)-B(30) | -62.1(4)  |
| B(25)-B(26)-B(31)-B(30) | 38.0(3)   |
| I(25)-B(26)-B(31)-B(30) | 146.9(3)  |
| C(3)-B(26)-B(31)-B(32)  | 99.5(3)   |
| B(27)-B(26)-B(31)-B(32) | 38.3(3)   |
| B(25)-B(26)-B(31)-B(32) | 138.4(3)  |
| I(25)-B(26)-B(31)-B(32) | -112.7(3) |
| C(3)-B(26)-B(31)-I(30)  | -147.6(3) |
| B(32)-B(26)-B(31)-I(30) | 112.9(3)  |
| B(27)-B(26)-B(31)-I(30) | 151.2(3)  |
| B(25)-B(26)-B(31)-I(30) | -108.7(3) |
| I(25)-B(26)-B(31)-I(30) | 0.3(5)    |
| C(3)-B(25)-B(31)-B(26)  | 39.2(3)   |
| B(24)-B(25)-B(31)-B(26) | 100.4(3)  |
| B(30)-B(25)-B(31)-B(26) | 137.7(3)  |
| I(24)-B(25)-B(31)-B(26) | -107.8(4) |
| C(3)-B(25)-B(31)-B(34)  | -60.9(4)  |
| B(24)-B(25)-B(31)-B(34) | 0.3(4)    |
| B(30)-B(25)-B(31)-B(34) | 37.5(3)   |
| B(26)-B(25)-B(31)-B(34) | -100.1(3) |
| I(24)-B(25)-B(31)-B(34) | 152.1(3)  |
| C(3)-B(25)-B(31)-B(30)  | -98.5(3)  |
| B(24)-B(25)-B(31)-B(30) | -37.2(3)  |
| B(26)-B(25)-B(31)-B(30) | -137.7(3) |
| I(24)-B(25)-B(31)-B(30) | 114.5(4)  |
| C(3)-B(25)-B(31)-B(32)  | 2.2(4)    |
| B(24)-B(25)-B(31)-B(32) | 63.4(4)   |
| B(30)-B(25)-B(31)-B(32) | 100.7(3)  |
| B(26)-B(25)-B(31)-B(32) | -37.0(3)  |

|                         |           |
|-------------------------|-----------|
| I(24)-B(25)-B(31)-B(32) | -144.8(3) |
| C(3)-B(25)-B(31)-I(30)  | 150.3(3)  |
| B(24)-B(25)-B(31)-I(30) | -148.4(3) |
| B(30)-B(25)-B(31)-I(30) | -111.2(3) |
| B(26)-B(25)-B(31)-I(30) | 111.1(3)  |
| I(24)-B(25)-B(31)-I(30) | 3.3(5)    |
| B(24)-B(30)-B(31)-B(26) | -1.1(4)   |
| B(29)-B(30)-B(31)-B(26) | 62.3(4)   |
| B(25)-B(30)-B(31)-B(26) | -38.3(3)  |
| B(34)-B(30)-B(31)-B(26) | 99.6(3)   |
| I(29)-B(30)-B(31)-B(26) | -147.7(3) |
| B(24)-B(30)-B(31)-B(25) | 37.2(3)   |
| B(29)-B(30)-B(31)-B(25) | 100.5(3)  |
| B(34)-B(30)-B(31)-B(25) | 137.9(3)  |
| I(29)-B(30)-B(31)-B(25) | -109.4(3) |
| B(24)-B(30)-B(31)-B(34) | -100.8(3) |
| B(29)-B(30)-B(31)-B(34) | -37.4(3)  |
| B(25)-B(30)-B(31)-B(34) | -137.9(3) |
| I(29)-B(30)-B(31)-B(34) | 112.7(3)  |
| B(24)-B(30)-B(31)-B(32) | -63.9(4)  |
| B(29)-B(30)-B(31)-B(32) | -0.6(4)   |
| B(25)-B(30)-B(31)-B(32) | -101.1(3) |
| B(34)-B(30)-B(31)-B(32) | 36.8(3)   |
| I(29)-B(30)-B(31)-B(32) | 149.5(3)  |
| B(24)-B(30)-B(31)-I(30) | 145.4(3)  |
| B(29)-B(30)-B(31)-I(30) | -151.2(3) |
| B(25)-B(30)-B(31)-I(30) | 108.3(3)  |
| B(34)-B(30)-B(31)-I(30) | -113.8(3) |
| I(29)-B(30)-B(31)-I(30) | -1.1(5)   |
| C(3)-B(26)-B(32)-B(34)  | -60.7(4)  |
| B(31)-B(26)-B(32)-B(34) | 37.4(3)   |
| B(27)-B(26)-B(32)-B(34) | -100.0(3) |
| B(25)-B(26)-B(32)-B(34) | 0.2(4)    |
| I(25)-B(26)-B(32)-B(34) | 151.0(3)  |
| C(3)-B(26)-B(32)-B(27)  | 39.3(3)   |
| B(31)-B(26)-B(32)-B(27) | 137.4(3)  |

|                         |           |
|-------------------------|-----------|
| B(25)-B(26)-B(32)-B(27) | 100.2(3)  |
| I(25)-B(26)-B(32)-B(27) | -109.0(3) |
| C(3)-B(26)-B(32)-B(31)  | -98.2(3)  |
| B(27)-B(26)-B(32)-B(31) | -137.4(3) |
| B(25)-B(26)-B(32)-B(31) | -37.2(3)  |
| I(25)-B(26)-B(32)-B(31) | 113.6(3)  |
| C(3)-B(26)-B(32)-B(33)  | 2.2(4)    |
| B(31)-B(26)-B(32)-B(33) | 100.4(3)  |
| B(27)-B(26)-B(32)-B(33) | -37.1(3)  |
| B(25)-B(26)-B(32)-B(33) | 63.2(4)   |
| I(25)-B(26)-B(32)-B(33) | -146.0(3) |
| C(3)-B(26)-B(32)-I(31)  | 149.8(3)  |
| B(31)-B(26)-B(32)-I(31) | -112.1(3) |
| B(27)-B(26)-B(32)-I(31) | 110.5(3)  |
| B(25)-B(26)-B(32)-I(31) | -149.3(3) |
| I(25)-B(26)-B(32)-I(31) | 1.5(5)    |
| C(3)-B(27)-B(32)-B(26)  | -39.3(3)  |
| B(33)-B(27)-B(32)-B(26) | -138.1(3) |
| B(28)-B(27)-B(32)-B(26) | -100.5(3) |
| I(26)-B(27)-B(32)-B(26) | 107.9(4)  |
| C(3)-B(27)-B(32)-B(34)  | 61.9(4)   |
| B(33)-B(27)-B(32)-B(34) | -36.9(3)  |
| B(26)-B(27)-B(32)-B(34) | 101.2(3)  |
| B(28)-B(27)-B(32)-B(34) | 0.7(4)    |
| I(26)-B(27)-B(32)-B(34) | -150.9(3) |
| C(3)-B(27)-B(32)-B(31)  | -1.4(4)   |
| B(33)-B(27)-B(32)-B(31) | -100.2(3) |
| B(26)-B(27)-B(32)-B(31) | 37.9(3)   |
| B(28)-B(27)-B(32)-B(31) | -62.6(4)  |
| I(26)-B(27)-B(32)-B(31) | 145.8(3)  |
| C(3)-B(27)-B(32)-B(33)  | 98.8(3)   |
| B(26)-B(27)-B(32)-B(33) | 138.1(3)  |
| B(28)-B(27)-B(32)-B(33) | 37.6(3)   |
| I(26)-B(27)-B(32)-B(33) | -114.0(4) |
| C(3)-B(27)-B(32)-I(31)  | -150.4(3) |
| B(33)-B(27)-B(32)-I(31) | 110.8(3)  |

|                         |           |
|-------------------------|-----------|
| B(26)-B(27)-B(32)-I(31) | -111.1(3) |
| B(28)-B(27)-B(32)-I(31) | 148.4(3)  |
| I(26)-B(27)-B(32)-I(31) | -3.2(5)   |
| B(25)-B(31)-B(32)-B(26) | 37.6(3)   |
| B(34)-B(31)-B(32)-B(26) | 138.2(3)  |
| B(30)-B(31)-B(32)-B(26) | 101.2(3)  |
| I(30)-B(31)-B(32)-B(26) | -108.9(3) |
| B(26)-B(31)-B(32)-B(34) | -138.2(3) |
| B(25)-B(31)-B(32)-B(34) | -100.5(3) |
| B(30)-B(31)-B(32)-B(34) | -36.9(3)  |
| I(30)-B(31)-B(32)-B(34) | 112.9(4)  |
| B(26)-B(31)-B(32)-B(27) | -38.1(3)  |
| B(25)-B(31)-B(32)-B(27) | -0.5(4)   |
| B(34)-B(31)-B(32)-B(27) | 100.0(3)  |
| B(30)-B(31)-B(32)-B(27) | 63.1(4)   |
| I(30)-B(31)-B(32)-B(27) | -147.1(3) |
| B(26)-B(31)-B(32)-B(33) | -100.6(3) |
| B(25)-B(31)-B(32)-B(33) | -63.0(4)  |
| B(34)-B(31)-B(32)-B(33) | 37.5(3)   |
| B(30)-B(31)-B(32)-B(33) | 0.6(4)    |
| I(30)-B(31)-B(32)-B(33) | 150.4(3)  |
| B(26)-B(31)-B(32)-I(31) | 110.3(3)  |
| B(25)-B(31)-B(32)-I(31) | 147.9(3)  |
| B(34)-B(31)-B(32)-I(31) | -111.6(3) |
| B(30)-B(31)-B(32)-I(31) | -148.5(3) |
| I(30)-B(31)-B(32)-I(31) | 1.3(5)    |
| C(3)-B(27)-B(33)-B(34)  | -61.4(4)  |
| B(32)-B(27)-B(33)-B(34) | 37.2(3)   |
| B(26)-B(27)-B(33)-B(34) | 0.1(4)    |
| B(28)-B(27)-B(33)-B(34) | -101.0(3) |
| I(26)-B(27)-B(33)-B(34) | 151.9(3)  |
| C(3)-B(27)-B(33)-B(28)  | 39.6(3)   |
| B(32)-B(27)-B(33)-B(28) | 138.2(3)  |
| B(26)-B(27)-B(33)-B(28) | 101.1(3)  |
| I(26)-B(27)-B(33)-B(28) | -107.1(4) |
| C(3)-B(27)-B(33)-B(29)  | 2.3(4)    |

|                         |           |
|-------------------------|-----------|
| B(32)-B(27)-B(33)-B(29) | 100.9(3)  |
| B(26)-B(27)-B(33)-B(29) | 63.8(4)   |
| B(28)-B(27)-B(33)-B(29) | -37.3(3)  |
| I(26)-B(27)-B(33)-B(29) | -144.4(3) |
| C(3)-B(27)-B(33)-B(32)  | -98.6(3)  |
| B(26)-B(27)-B(33)-B(32) | -37.1(3)  |
| B(28)-B(27)-B(33)-B(32) | -138.2(3) |
| I(26)-B(27)-B(33)-B(32) | 114.7(4)  |
| C(3)-B(27)-B(33)-I(32)  | 150.6(3)  |
| B(32)-B(27)-B(33)-I(32) | -110.8(3) |
| B(26)-B(27)-B(33)-I(32) | -148.0(3) |
| B(28)-B(27)-B(33)-I(32) | 110.9(3)  |
| I(26)-B(27)-B(33)-I(32) | 3.9(5)    |
| C(3)-B(28)-B(33)-B(27)  | -39.6(3)  |
| B(24)-B(28)-B(33)-B(27) | -100.7(3) |
| B(29)-B(28)-B(33)-B(27) | -138.3(3) |
| I(27)-B(28)-B(33)-B(27) | 107.9(4)  |
| C(3)-B(28)-B(33)-B(34)  | 61.3(4)   |
| B(24)-B(28)-B(33)-B(34) | 0.2(4)    |
| B(29)-B(28)-B(33)-B(34) | -37.4(3)  |
| B(27)-B(28)-B(33)-B(34) | 100.9(3)  |
| I(27)-B(28)-B(33)-B(34) | -151.2(3) |
| C(3)-B(28)-B(33)-B(29)  | 98.6(3)   |
| B(24)-B(28)-B(33)-B(29) | 37.6(3)   |
| B(27)-B(28)-B(33)-B(29) | 138.3(3)  |
| I(27)-B(28)-B(33)-B(29) | -113.8(3) |
| C(3)-B(28)-B(33)-B(32)  | -2.2(4)   |
| B(24)-B(28)-B(33)-B(32) | -63.2(4)  |
| B(29)-B(28)-B(33)-B(32) | -100.8(3) |
| B(27)-B(28)-B(33)-B(32) | 37.5(3)   |
| I(27)-B(28)-B(33)-B(32) | 145.3(3)  |
| C(3)-B(28)-B(33)-I(32)  | -147.6(3) |
| B(24)-B(28)-B(33)-I(32) | 151.4(3)  |
| B(29)-B(28)-B(33)-I(32) | 113.8(3)  |
| B(27)-B(28)-B(33)-I(32) | -107.9(3) |
| I(27)-B(28)-B(33)-I(32) | -0.1(5)   |

|                         |           |
|-------------------------|-----------|
| B(24)-B(29)-B(33)-B(27) | -0.2(4)   |
| B(30)-B(29)-B(33)-B(27) | -63.6(4)  |
| B(28)-B(29)-B(33)-B(27) | 37.5(3)   |
| B(34)-B(29)-B(33)-B(27) | -100.8(3) |
| I(28)-B(29)-B(33)-B(27) | 146.4(3)  |
| B(24)-B(29)-B(33)-B(34) | 100.6(3)  |
| B(30)-B(29)-B(33)-B(34) | 37.2(3)   |
| B(28)-B(29)-B(33)-B(34) | 138.3(3)  |
| I(28)-B(29)-B(33)-B(34) | -112.8(3) |
| B(24)-B(29)-B(33)-B(28) | -37.7(3)  |
| B(30)-B(29)-B(33)-B(28) | -101.1(3) |
| B(34)-B(29)-B(33)-B(28) | -138.3(3) |
| I(28)-B(29)-B(33)-B(28) | 108.9(3)  |
| B(24)-B(29)-B(33)-B(32) | 63.4(4)   |
| B(30)-B(29)-B(33)-B(32) | 0.0(4)    |
| B(28)-B(29)-B(33)-B(32) | 101.1(3)  |
| B(34)-B(29)-B(33)-B(32) | -37.2(3)  |
| I(28)-B(29)-B(33)-B(32) | -150.0(3) |
| B(24)-B(29)-B(33)-I(32) | -146.5(3) |
| B(30)-B(29)-B(33)-I(32) | 150.1(3)  |
| B(28)-B(29)-B(33)-I(32) | -108.8(3) |
| B(34)-B(29)-B(33)-I(32) | 112.9(4)  |
| I(28)-B(29)-B(33)-I(32) | 0.1(5)    |
| B(26)-B(32)-B(33)-B(27) | 37.6(3)   |
| B(34)-B(32)-B(33)-B(27) | 138.3(3)  |
| B(31)-B(32)-B(33)-B(27) | 100.6(3)  |
| I(31)-B(32)-B(33)-B(27) | -110.0(3) |
| B(26)-B(32)-B(33)-B(34) | -100.8(3) |
| B(27)-B(32)-B(33)-B(34) | -138.3(3) |
| B(31)-B(32)-B(33)-B(34) | -37.7(3)  |
| I(31)-B(32)-B(33)-B(34) | 111.7(3)  |
| B(26)-B(32)-B(33)-B(28) | 0.0(4)    |
| B(34)-B(32)-B(33)-B(28) | 100.8(3)  |
| B(27)-B(32)-B(33)-B(28) | -37.6(3)  |
| B(31)-B(32)-B(33)-B(28) | 63.0(4)   |
| I(31)-B(32)-B(33)-B(28) | -147.5(3) |

|                         |           |
|-------------------------|-----------|
| B(26)-B(32)-B(33)-B(29) | -63.4(4)  |
| B(34)-B(32)-B(33)-B(29) | 37.4(3)   |
| B(27)-B(32)-B(33)-B(29) | -101.0(3) |
| B(31)-B(32)-B(33)-B(29) | -0.4(4)   |
| I(31)-B(32)-B(33)-B(29) | 149.1(3)  |
| B(26)-B(32)-B(33)-I(32) | 145.4(3)  |
| B(34)-B(32)-B(33)-I(32) | -113.8(3) |
| B(27)-B(32)-B(33)-I(32) | 107.9(3)  |
| B(31)-B(32)-B(33)-I(32) | -151.5(3) |
| I(31)-B(32)-B(33)-I(32) | -2.1(5)   |
| B(27)-B(33)-B(34)-B(32) | -37.3(3)  |
| B(28)-B(33)-B(34)-B(32) | -101.1(3) |
| B(29)-B(33)-B(34)-B(32) | -138.4(3) |
| I(32)-B(33)-B(34)-B(32) | 108.8(3)  |
| B(27)-B(33)-B(34)-B(29) | 101.0(3)  |
| B(28)-B(33)-B(34)-B(29) | 37.2(3)   |
| B(32)-B(33)-B(34)-B(29) | 138.4(3)  |
| I(32)-B(33)-B(34)-B(29) | -112.8(3) |
| B(27)-B(33)-B(34)-B(30) | 64.2(4)   |
| B(28)-B(33)-B(34)-B(30) | 0.4(4)    |
| B(29)-B(33)-B(34)-B(30) | -36.9(3)  |
| B(32)-B(33)-B(34)-B(30) | 101.5(3)  |
| I(32)-B(33)-B(34)-B(30) | -149.7(3) |
| B(27)-B(33)-B(34)-B(31) | 0.7(4)    |
| B(28)-B(33)-B(34)-B(31) | -63.2(4)  |
| B(29)-B(33)-B(34)-B(31) | -100.4(3) |
| B(32)-B(33)-B(34)-B(31) | 38.0(3)   |
| I(32)-B(33)-B(34)-B(31) | 146.8(3)  |
| B(27)-B(33)-B(34)-I(33) | -148.4(3) |
| B(28)-B(33)-B(34)-I(33) | 147.8(3)  |
| B(29)-B(33)-B(34)-I(33) | 110.6(3)  |
| B(32)-B(33)-B(34)-I(33) | -111.1(3) |
| I(32)-B(33)-B(34)-I(33) | -2.3(4)   |
| B(26)-B(32)-B(34)-B(33) | 100.4(3)  |
| B(27)-B(32)-B(34)-B(33) | 36.8(3)   |
| B(31)-B(32)-B(34)-B(33) | 137.7(3)  |



|                         |           |
|-------------------------|-----------|
| I(31)-B(32)-B(34)-B(33) | -110.4(3) |
| B(26)-B(32)-B(34)-B(29) | 63.0(4)   |
| B(27)-B(32)-B(34)-B(29) | -0.7(4)   |
| B(31)-B(32)-B(34)-B(29) | 100.3(3)  |
| B(33)-B(32)-B(34)-B(29) | -37.4(3)  |
| I(31)-B(32)-B(34)-B(29) | -147.9(3) |
| B(26)-B(32)-B(34)-B(30) | -0.2(4)   |
| B(27)-B(32)-B(34)-B(30) | -63.8(4)  |
| B(31)-B(32)-B(34)-B(30) | 37.1(3)   |
| B(33)-B(32)-B(34)-B(30) | -100.6(3) |
| I(31)-B(32)-B(34)-B(30) | 149.0(3)  |
| B(26)-B(32)-B(34)-B(31) | -37.3(3)  |
| B(27)-B(32)-B(34)-B(31) | -100.9(3) |
| B(33)-B(32)-B(34)-B(31) | -137.7(3) |
| I(31)-B(32)-B(34)-B(31) | 111.9(3)  |
| B(26)-B(32)-B(34)-I(33) | -150.2(3) |
| B(27)-B(32)-B(34)-I(33) | 146.1(3)  |
| B(31)-B(32)-B(34)-I(33) | -113.0(3) |
| B(33)-B(32)-B(34)-I(33) | 109.4(3)  |
| I(31)-B(32)-B(34)-I(33) | -1.1(5)   |
| B(24)-B(29)-B(34)-B(33) | -100.6(3) |
| B(30)-B(29)-B(34)-B(33) | -138.5(3) |
| B(28)-B(29)-B(34)-B(33) | -37.2(3)  |
| I(28)-B(29)-B(34)-B(33) | 110.0(3)  |
| B(24)-B(29)-B(34)-B(32) | -63.0(4)  |
| B(30)-B(29)-B(34)-B(32) | -100.9(3) |
| B(28)-B(29)-B(34)-B(32) | 0.4(4)    |
| B(33)-B(29)-B(34)-B(32) | 37.6(3)   |
| I(28)-B(29)-B(34)-B(32) | 147.6(3)  |
| B(24)-B(29)-B(34)-B(30) | 37.9(3)   |
| B(28)-B(29)-B(34)-B(30) | 101.3(3)  |
| B(33)-B(29)-B(34)-B(30) | 138.5(3)  |
| I(28)-B(29)-B(34)-B(30) | -111.4(3) |
| B(24)-B(29)-B(34)-B(31) | 0.7(4)    |
| B(30)-B(29)-B(34)-B(31) | -37.2(3)  |
| B(28)-B(29)-B(34)-B(31) | 64.1(4)   |

|                         |           |
|-------------------------|-----------|
| B(33)-B(29)-B(34)-B(31) | 101.3(3)  |
| I(28)-B(29)-B(34)-B(31) | -148.7(3) |
| B(24)-B(29)-B(34)-I(33) | 150.1(3)  |
| B(30)-B(29)-B(34)-I(33) | 112.2(3)  |
| B(28)-B(29)-B(34)-I(33) | -146.5(3) |
| B(33)-B(29)-B(34)-I(33) | -109.3(3) |
| I(28)-B(29)-B(34)-I(33) | 0.7(5)    |
| B(24)-B(30)-B(34)-B(33) | -0.8(4)   |
| B(29)-B(30)-B(34)-B(33) | 37.1(3)   |
| B(25)-B(30)-B(34)-B(33) | -63.9(4)  |
| B(31)-B(30)-B(34)-B(33) | -101.2(3) |
| I(29)-B(30)-B(34)-B(33) | 148.7(3)  |
| B(24)-B(30)-B(34)-B(32) | 63.2(4)   |
| B(29)-B(30)-B(34)-B(32) | 101.1(3)  |
| B(25)-B(30)-B(34)-B(32) | 0.1(4)    |
| B(31)-B(30)-B(34)-B(32) | -37.2(3)  |
| I(29)-B(30)-B(34)-B(32) | -147.3(3) |
| B(24)-B(30)-B(34)-B(29) | -37.9(3)  |
| B(25)-B(30)-B(34)-B(29) | -101.1(3) |
| B(31)-B(30)-B(34)-B(29) | -138.3(3) |
| I(29)-B(30)-B(34)-B(29) | 111.6(3)  |
| B(24)-B(30)-B(34)-B(31) | 100.4(3)  |
| B(29)-B(30)-B(34)-B(31) | 138.3(3)  |
| B(25)-B(30)-B(34)-B(31) | 37.3(3)   |
| I(29)-B(30)-B(34)-B(31) | -110.1(4) |
| B(24)-B(30)-B(34)-I(33) | -147.2(3) |
| B(29)-B(30)-B(34)-I(33) | -109.3(3) |
| B(25)-B(30)-B(34)-I(33) | 149.6(3)  |
| B(31)-B(30)-B(34)-I(33) | 112.4(3)  |
| I(29)-B(30)-B(34)-I(33) | 2.2(5)    |
| B(26)-B(31)-B(34)-B(33) | -1.2(4)   |
| B(25)-B(31)-B(34)-B(33) | 62.9(4)   |
| B(30)-B(31)-B(34)-B(33) | 100.6(3)  |
| B(32)-B(31)-B(34)-B(33) | -38.1(3)  |
| I(30)-B(31)-B(34)-B(33) | -150.1(3) |
| B(26)-B(31)-B(34)-B(32) | 36.9(3)   |

|                         |           |
|-------------------------|-----------|
| B(25)-B(31)-B(34)-B(32) | 101.0(3)  |
| B(30)-B(31)-B(34)-B(32) | 138.7(3)  |
| I(30)-B(31)-B(34)-B(32) | -112.0(4) |
| B(26)-B(31)-B(34)-B(29) | -64.7(4)  |
| B(25)-B(31)-B(34)-B(29) | -0.6(4)   |
| B(30)-B(31)-B(34)-B(29) | 37.0(3)   |
| B(32)-B(31)-B(34)-B(29) | -101.7(3) |
| I(30)-B(31)-B(34)-B(29) | 146.4(3)  |
| B(26)-B(31)-B(34)-B(30) | -101.7(3) |
| B(25)-B(31)-B(34)-B(30) | -37.6(3)  |
| B(32)-B(31)-B(34)-B(30) | -138.7(3) |
| I(30)-B(31)-B(34)-B(30) | 109.4(4)  |
| B(26)-B(31)-B(34)-I(33) | 146.8(3)  |
| B(25)-B(31)-B(34)-I(33) | -149.1(3) |
| B(30)-B(31)-B(34)-I(33) | -111.5(4) |
| B(32)-B(31)-B(34)-I(33) | 109.8(3)  |
| I(30)-B(31)-B(34)-I(33) | -2.1(5)   |

---

Symmetry transformations used to generate equivalent atoms:

**Table 7.** Hydrogen bonds for cr301r\_0m-6 [ $\text{\AA}$  and  $^\circ$ ].

| D-H...A                | d(D-H)    | d(H...A)  | d(D...A)  | <(DHA)    |
|------------------------|-----------|-----------|-----------|-----------|
| O(1)-H(1WA)...O(7)     | 1.001(9)  | 1.804(19) | 2.766(7)  | 160(5)    |
| O(1)-H(1WB)...I(25)    | 0.997(10) | 3.022(17) | 3.836(5)  | 139.5(19) |
| O(2)-H(2WA)...I(10)#1  | 1.000(10) | 2.77(3)   | 3.433(5)  | 124(3)    |
| O(2)-H(2WB)...I(30)    | 0.999(10) | 2.84(4)   | 3.549(5)  | 128(3)    |
| O(2)-H(2WB)...I(7)     | 0.999(10) | 3.13(5)   | 3.831(5)  | 128(4)    |
| O(3)-H(3WA)...O(9)#2   | 1.001(9)  | 2.03(2)   | 2.778(7)  | 129(2)    |
| O(3)-H(3WB)...O(2)     | 0.999(9)  | 2.123(15) | 3.015(8)  | 148(2)    |
| O(3)-H(3WB)...I(10)#1  | 0.999(9)  | 2.97(2)   | 3.686(5)  | 129.4(18) |
| O(4)-H(4WA)...O(8)     | 1.001(10) | 1.879(19) | 2.864(7)  | 167(5)    |
| O(4)-H(4WB)...O(1)     | 1.001(10) | 1.977(17) | 2.819(8)  | 140(2)    |
| O(5)-H(5WA)...O(3)     | 1.000(9)  | 1.791(15) | 2.728(7)  | 154(3)    |
| O(5)-H(5WB)...O(12)#3  | 0.997(9)  | 1.711(12) | 2.668(8)  | 160(3)    |
| O(6)-H(6WA)...O(2)     | 1.004(9)  | 1.702(14) | 2.692(7)  | 168(3)    |
| O(6)-H(6WB)...O(11)    | 1.002(10) | 1.623(12) | 2.623(8)  | 175(4)    |
| O(6)-H(6WC)...O(1)     | 1.000(10) | 1.638(16) | 2.618(7)  | 165(4)    |
| O(7)-H(7WA)...O(12)    | 1.002(10) | 1.83(3)   | 2.721(8)  | 146(3)    |
| O(7)-H(7WB)...I(5)#2   | 1.000(10) | 2.787(19) | 3.752(5)  | 162(5)    |
| O(8)-H(8WA)...I(24)    | 0.999(10) | 2.82(2)   | 3.658(4)  | 142(2)    |
| O(8)-H(8WA)...I(30)    | 0.999(10) | 3.12(3)   | 3.798(4)  | 126(2)    |
| O(8)-H(8WB)...I(19)#4  | 0.998(10) | 2.98(3)   | 3.782(5)  | 138(4)    |
| O(8)-H(8WB)...I(14)#4  | 0.998(10) | 3.27(3)   | 3.876(4)  | 121(2)    |
| O(8)-H(8WB)...I(20)#4  | 0.998(10) | 3.31(4)   | 4.081(4)  | 135(4)    |
| O(9)-H(9WA)...O(4)     | 1.000(10) | 1.855(18) | 2.786(6)  | 153(3)    |
| O(9)-H(9WB)...I(13)#4  | 0.999(10) | 2.76(2)   | 3.717(4)  | 161(5)    |
| O(10)-H(10A)...O(3)    | 1.003(9)  | 1.779(17) | 2.697(8)  | 150(2)    |
| O(10)-H(10B)...O(4)    | 0.999(9)  | 1.708(13) | 2.698(8)  | 170(3)    |
| O(10)-H(10C)...O(10)#2 | 1.283(6)  | 1.283(6)  | 2.567(12) | 180.0(3)  |
| O(11)-H(11A)...O(8)#1  | 1.002(10) | 1.778(15) | 2.773(8)  | 171(4)    |
| O(11)-H(11B)...I(6)#1  | 1.003(10) | 2.70(3)   | 3.634(6)  | 155(5)    |
| O(12)-H(12A)...O(5)    | 1.006(10) | 2.01(3)   | 2.636(8)  | 118(2)    |
| O(12)-H(12B)...O(11)#3 | 1.007(10) | 2.13(2)   | 3.026(9)  | 148(3)    |
| O(13)-H(13A)...I(7)    | 0.998(10) | 2.728(15) | 3.625(4)  | 150(2)    |

|                         |           |         |           |           |
|-------------------------|-----------|---------|-----------|-----------|
| O(13)-H(13A)...I(2)     | 0.998(10) | 3.28(3) | 3.923(4)  | 124.1(19) |
| O(13)-H(13B)...I(16)#5  | 0.998(10) | 2.89(3) | 3.804(4)  | 153(5)    |
| O(13)-H(13B)...I(12)#5  | 0.998(10) | 3.11(5) | 3.755(4)  | 124(4)    |
| O(14)-H(14A)...O(13)    | 0.996(10) | 2.16(3) | 2.828(6)  | 123(2)    |
| O(14)-H(14A)...I(9)#1   | 0.996(10) | 3.15(2) | 3.771(4)  | 122(2)    |
| O(14)-H(14A)...I(12)#5  | 0.996(10) | 3.24(3) | 3.959(4)  | 131(2)    |
| O(14)-H(14B)...O(22D)#6 | 0.995(10) | 1.87(3) | 2.492(10) | 117(2)    |
| O(14)-H(14B)...O(22)    | 0.995(10) | 1.93(3) | 2.678(17) | 130(2)    |
| O(15)-H(15A)...I(22)#5  | 0.997(10) | 2.96(2) | 3.841(5)  | 148(3)    |
| O(15)-H(15A)...I(17)#5  | 0.997(10) | 3.28(3) | 3.916(4)  | 123(2)    |
| O(15)-H(15B)...I(29)#7  | 0.996(10) | 3.07(2) | 3.905(4)  | 143(3)    |
| O(15)-H(15B)...I(23)#7  | 0.996(10) | 3.05(3) | 3.798(4)  | 133(3)    |
| O(16)-H(16A)...O(15)    | 1.002(10) | 1.92(2) | 2.728(8)  | 136(3)    |
| O(16)-H(16B)...O(19)    | 1.000(10) | 1.62(2) | 2.582(13) | 160(4)    |
| O(16)-H(16C)...O(18)    | 1.001(10) | 2.05(3) | 2.573(9)  | 110(2)    |
| O(16)-H(16C)...I(17)#5  | 1.001(10) | 2.86(2) | 3.739(6)  | 147(3)    |
| O(17)-H(17B)...O(23)    | 0.999(10) | 2.37(3) | 3.012(14) | 121(3)    |
| O(18)-H(18A)...O(22)    | 1.000(10) | 1.99(3) | 2.86(2)   | 145(2)    |
| O(19)-H(19A)...O(23)    | 1.005(10) | 1.93(2) | 2.829(13) | 147(3)    |
| O(20)-H(20B)...I(32)#6  | 1.000(10) | 2.96(2) | 3.575(6)  | 121(2)    |
| O(21)-H(21A)...I(28)    | 1.002(10) | 2.83(2) | 3.767(8)  | 156(4)    |
| O(22)-H(22B)...O(20)#6  | 1.001(10) | 1.71(2) | 2.551(14) | 138(2)    |
| O(22D)-H(22D)...O(20)   | 1.004(10) | 2.24(3) | 2.845(12) | 117(3)    |
| O(23)-H(23A)...I(8)     | 1.000(10) | 2.72(4) | 3.495(13) | 135(4)    |
| O(23D)-H(23D)...O(16)#7 | 1.002(10) | 2.41(5) | 3.310(18) | 149(7)    |
| O(24)-H(24A)...I(29)#1  | 1.000(10) | 2.90(5) | 3.472(15) | 117(4)    |
| O(24)-H(24A)...I(32)    | 1.000(10) | 3.14(5) | 3.950(13) | 139(5)    |
| O(24)-H(24B)...O(20)#6  | 1.000(10) | 1.95(6) | 2.84(2)   | 146(8)    |
| O(24)-H(24B)...O(22)    | 1.000(10) | 2.09(6) | 2.87(2)   | 134(7)    |

---

Symmetry transformations used to generate equivalent atoms:

#1  $x-1, y, z$  #2  $-x+1, -y+1, -z+1$  #3  $-x, -y+1, -z+1$

#4  $x+1, y, z$  #5  $x, y+1, z$  #6  $-x, -y+2, -z$  #7  $-x+1, -y+2, -z$
